# Supplementary material for: Mono- and Dimeric Xanthones with Anti-Glioma and Anti-Inflammatory Activities from the Ascidian-Derived Fungus Diaporthe sp. SYSU-MS4722
Source: MDPI journal article supplement (doi:10.3390/md20010051), 2022-01-05
Supplement: s1 [file s1]

## Supporting Information

# Mono- and dimeric xanthonones with anti-glioma and anti-inflammatory from the ascidian-derived fungus *Diaporthe* sp. SYSU-MS4722

Senhua Chen <sup>1,2</sup>, Heng Guo <sup>1,2</sup>, Minghua Jiang <sup>1,2</sup>, Qilin Wu <sup>1,2</sup>, Jing Li <sup>1,2</sup>, Hongjie Shen <sup>1,2,\*</sup> and Lan Liu <sup>1,2,3,4,\*</sup>

<sup>1</sup> School of Marine Sciences, Sun Yat-sen University, Zhuhai 519082, China; [chensenh@mail.sysu.edu.cn](mailto:chensenh@mail.sysu.edu.cn); [hengguo163@163.com](mailto:hengguo163@163.com); [jiangmh23@mail2.sysu.edu.cn](mailto:jiangmh23@mail2.sysu.edu.cn); [wuqlin3@mail2.sysu.edu.cn](mailto:wuqlin3@mail2.sysu.edu.cn); [lijing356@mail.sysu.edu.cn](mailto:lijing356@mail.sysu.edu.cn)

<sup>2</sup> Southern Laboratory of Ocean Science and Engineering, Zhuhai 519082, China

<sup>3</sup> Guangdong Provincial Key Laboratory of Marine Resources and Coastal Engineering, Zhuhai 519082, China.

<sup>4</sup> Pearl River Estuary Marine Ecosystem Research Station, Ministry of Education, Zhuhai 519082, China.

\* Correspondence: [shenhj5@mail2.sysu.edu.cn](mailto:shenhj5@mail2.sysu.edu.cn); [cesllan@mail.sysu.edu.cn](mailto:cesllan@mail.sysu.edu.cn); Tel.: (optional; include country code; if there are multiple corresponding authors, add author initials)

|                                                                                                               |    |
|---------------------------------------------------------------------------------------------------------------|----|
| Figure S1. The HRESIMS spectrum of compound <b>1</b> .....                                                    | 4  |
| Figure S2. The <sup>1</sup> H NMR (600MHz) spectrum of compound <b>1</b> in CD <sub>3</sub> OD.....           | 4  |
| Figure S3. The <sup>13</sup> C NMR (150MHz) spectrum of compound <b>1</b> in CD <sub>3</sub> OD.....          | 5  |
| Figure S4. The HSQC spectrum of compound <b>1</b> in CD <sub>3</sub> OD. ....                                 | 5  |
| Figure S5. The <sup>1</sup> H- <sup>1</sup> H COSY spectrum of compound <b>1</b> in CD <sub>3</sub> OD. ....  | 6  |
| Figure S6. The HMBC spectrum of compound <b>1</b> in CD <sub>3</sub> OD. ....                                 | 6  |
| Figure S7. The NOESY spectrum of compound <b>1</b> in CD <sub>3</sub> OD.....                                 | 7  |
| Figure S8. The IR spectrum of compound <b>1</b> .....                                                         | 7  |
| Figure S9. The HRESIMS spectrum of compound <b>2</b> .....                                                    | 8  |
| Figure S10. The <sup>1</sup> H NMR (400MHz) spectrum of compound <b>2</b> in CD <sub>3</sub> OD.....          | 8  |
| Figure S11. The <sup>13</sup> C NMR (100MHz) spectrum of compound <b>2</b> in CD <sub>3</sub> OD.....         | 9  |
| Figure S12. The HSQC spectrum of compound <b>2</b> in CD <sub>3</sub> OD. ....                                | 9  |
| Figure S13. The <sup>1</sup> H- <sup>1</sup> H COSY spectrum of compound <b>2</b> in CD <sub>3</sub> OD. .... | 10 |
| Figure S14. The HMBC spectrum of compound <b>2</b> in CD <sub>3</sub> OD. ....                                | 10 |
| Figure S15. The NOESY spectrum of compound <b>2</b> in CD <sub>3</sub> OD.....                                | 11 |

|                                                                                                                        |    |
|------------------------------------------------------------------------------------------------------------------------|----|
| <b>Figure S16.</b> The IR spectrum of compound <b>2</b> .....                                                          | 11 |
| <b>Figure S17.</b> The HRESIMS spectrum of compound <b>3</b> .....                                                     | 12 |
| <b>Figure S18.</b> The $^1\text{H}$ NMR (400MHz) spectrum of compound <b>3</b> in acetone- $d_6$ . ....                | 12 |
| <b>Figure S19.</b> The $^{13}\text{C}$ NMR (100MHz) spectrum of compound <b>3</b> in acetone- $d_6$ . ....             | 13 |
| <b>Figure S20.</b> The HSQC spectrum of compound <b>3</b> in acetone- $d_6$ .....                                      | 13 |
| <b>Figure S21.</b> The $^1\text{H}$ - $^1\text{H}$ COSY spectrum of compound <b>3</b> in acetone- $d_6$ .....          | 14 |
| <b>Figure S22.</b> The HMBC spectrum of compound <b>3</b> in acetone- $d_6$ .....                                      | 14 |
| <b>Figure S23.</b> The NOESY spectrum of compound <b>3</b> in acetone- $d_6$ . ....                                    | 15 |
| <b>Figure S24.</b> IR spectrum of compound <b>3</b> . ....                                                             | 15 |
| <b>Figure S25.</b> The HRESIMS spectrum of compound <b>4</b> .....                                                     | 16 |
| <b>Figure S26.</b> The $^1\text{H}$ NMR (400MHz) spectrum of compound <b>4</b> in $\text{CD}_3\text{OD}$ . ....        | 16 |
| <b>Figure S27.</b> The $^{13}\text{C}$ NMR (100MHz) spectrum of compound <b>4</b> in $\text{CD}_3\text{OD}$ . ....     | 17 |
| <b>Figure S28.</b> The HSQC spectrum of compound <b>4</b> in $\text{CD}_3\text{OD}$ . ....                             | 17 |
| <b>Figure S29.</b> The $^1\text{H}$ - $^1\text{H}$ COSY spectrum of compound <b>4</b> in $\text{CD}_3\text{OD}$ . .... | 18 |
| <b>Figure S30.</b> The HMBC spectrum of compound <b>4</b> in $\text{CD}_3\text{OD}$ . ....                             | 18 |
| <b>Figure S31.</b> The NOESY spectrum of compound <b>4</b> in $\text{CD}_3\text{OD}$ .....                             | 19 |
| <b>Figure S32.</b> IR spectrum of compound <b>4</b> . ....                                                             | 19 |
| <b>Figure S33.</b> The HRESIMS spectrum of compound <b>5</b> .....                                                     | 20 |
| <b>Figure S34.</b> The $^1\text{H}$ NMR (400MHz) spectrum of compound <b>5</b> in $\text{CDCl}_3$ . ....               | 20 |
| <b>Figure S35.</b> The $^{13}\text{C}$ NMR (100MHz) spectrum of compound <b>5</b> in $\text{CDCl}_3$ . ....            | 21 |
| <b>Figure S36.</b> The HSQC spectrum of compound <b>5</b> in $\text{CDCl}_3$ . ....                                    | 21 |
| <b>Figure S37.</b> The $^1\text{H}$ - $^1\text{H}$ COSY spectrum of compound <b>5</b> in $\text{CDCl}_3$ . ....        | 22 |
| <b>Figure S38.</b> The HMBC spectrum of compound <b>5</b> in $\text{CDCl}_3$ . ....                                    | 22 |
| <b>Figure S39.</b> The NOESY spectrum of compound <b>5</b> in $\text{CDCl}_3$ .....                                    | 23 |
| <b>Figure S40.</b> IR spectrum of compound <b>5</b> . ....                                                             | 23 |
| <b>Figure S41.</b> The HRESIMS spectrum of compound <b>6</b> .....                                                     | 24 |
| <b>Figure S44.</b> The HSQC spectrum of compound <b>6</b> in $\text{CDCl}_3$ . ....                                    | 25 |
| <b>Figure S45.</b> The $^1\text{H}$ - $^1\text{H}$ COSY spectrum of compound <b>6</b> in $\text{CDCl}_3$ . ....        | 26 |
| <b>Figure S46.</b> The HMBC spectrum of compound <b>6</b> in $\text{CDCl}_3$ . ....                                    | 26 |
| <b>Figure S47.</b> The NOESY spectrum of compound <b>6</b> in $\text{CDCl}_3$ .....                                    | 27 |
| <b>Figure S48.</b> IR spectrum of compound <b>6</b> . ....                                                             | 27 |
| <b>Figure S49.</b> The HRESIMS spectrum of compound <b>7</b> $\text{CD}_3\text{OD}$ .....                              | 28 |

|                                                                                                                                                                     |    |
|---------------------------------------------------------------------------------------------------------------------------------------------------------------------|----|
| <b>Figure S50.</b> The $^1\text{H}$ NMR (400MHz) spectrum of compound <b>7</b> in $\text{CD}_3\text{OD}$ .....                                                      | 28 |
| <b>Figure S51.</b> The $^{13}\text{C}$ NMR (100MHz) spectrum of compound <b>7</b> in $\text{CD}_3\text{OD}$ .....                                                   | 29 |
| <b>Figure S52.</b> The HSQC spectrum of compound <b>7</b> in $\text{CD}_3\text{OD}$ . ....                                                                          | 29 |
| <b>Figure S53.</b> The $^1\text{H}$ - $^1\text{H}$ COSY spectrum of compound <b>7</b> in $\text{CD}_3\text{OD}$ . ....                                              | 30 |
| <b>Figure S54.</b> The HMBC spectrum of compound <b>7</b> in $\text{CD}_3\text{OD}$ . ....                                                                          | 30 |
| <b>Figure S55.</b> The NOESY spectrum of compound <b>7</b> in $\text{CD}_3\text{OD}$ .....                                                                          | 31 |
| <b>Figure S56.</b> IR spectrum of compound <b>7</b> . ....                                                                                                          | 31 |
| <b>Experimental section:</b> .....                                                                                                                                  | 32 |
| <b>Table S1.</b> Energy of all conformers of diaporthone A ( <b>1</b> ).....                                                                                        | 32 |
| <b>Figure S57.</b> B3LYP/6-311g** optimized low-energy conformers of diaporthone A ( <b>1</b> ).....                                                                | 32 |
| <b>Table S2.</b> Cartesian coordinates of the low-energy reoptimized conformers of <b>1</b> calculated at b3lyp/6-311g** level of theory in PCM for methanol. ....  | 32 |
| <b>Table S3.</b> Energy of all conformers of diaporthone C ( <b>3</b> ).....                                                                                        | 36 |
| <b>Figure S58.</b> B3LYP/6-311g** optimized low-energy conformers of diaporthone C ( <b>3</b> ).....                                                                | 36 |
| <b>Table S4.</b> Cartesian coordinates of the low-energy reoptimized conformers of <b>3</b> calculated at b3lyp/6-311g** level of theory in PCM for methanol. ....  | 36 |
| <b>Table S5.</b> Energy of all conformers of diaporthone D ( <b>4</b> ).....                                                                                        | 38 |
| <b>Figure S59.</b> B3LYP/6-311g** optimized low-energy conformers of diaporthone D ( <b>4</b> ).....                                                                | 39 |
| <b>Table S6.</b> Cartesian coordinates of the low-energy reoptimized conformers of <b>4</b> calculated at b3lyp/6-311g** level of theory in PCM for methanol. ....  | 39 |
| <b>Table S7.</b> Energy of all conformers of diaporthone E ( <b>5</b> ). ....                                                                                       | 51 |
| <b>Figure S60.</b> B3LYP/6-311g** optimized low-energy conformers of diaporthone E ( <b>5</b> ). ....                                                               | 51 |
| <b>Table S8.</b> Cartesian coordinates of the low-energy reoptimized conformers of <b>5</b> calculated at b3lyp/6-311g** level of theory in PCM for methanol. ....  | 51 |
| <b>Table S9.</b> Energy of all conformers of compound <b>7</b> . ....                                                                                               | 54 |
| <b>Figure S61.</b> B3LYP/6-311g** optimized low-energy conformers of compound <b>7</b> . ....                                                                       | 55 |
| <b>Table S10.</b> Cartesian coordinates of the low-energy reoptimized conformers of <b>7</b> calculated at b3lyp/6-311g** level of theory in PCM for methanol. .... | 55 |
| <b>Figure S62.</b> Plausible biogenetic pathway leading to a formation of <b>2</b> and ( $\pm$ )- <b>7</b> . ....                                                   | 70 |
| <b>Figure S63.</b> Experimental ECD spectra of <b>2</b> , <b>3</b> , (+) and (-)- <b>7</b> (in MeOH). ....                                                          | 70 |

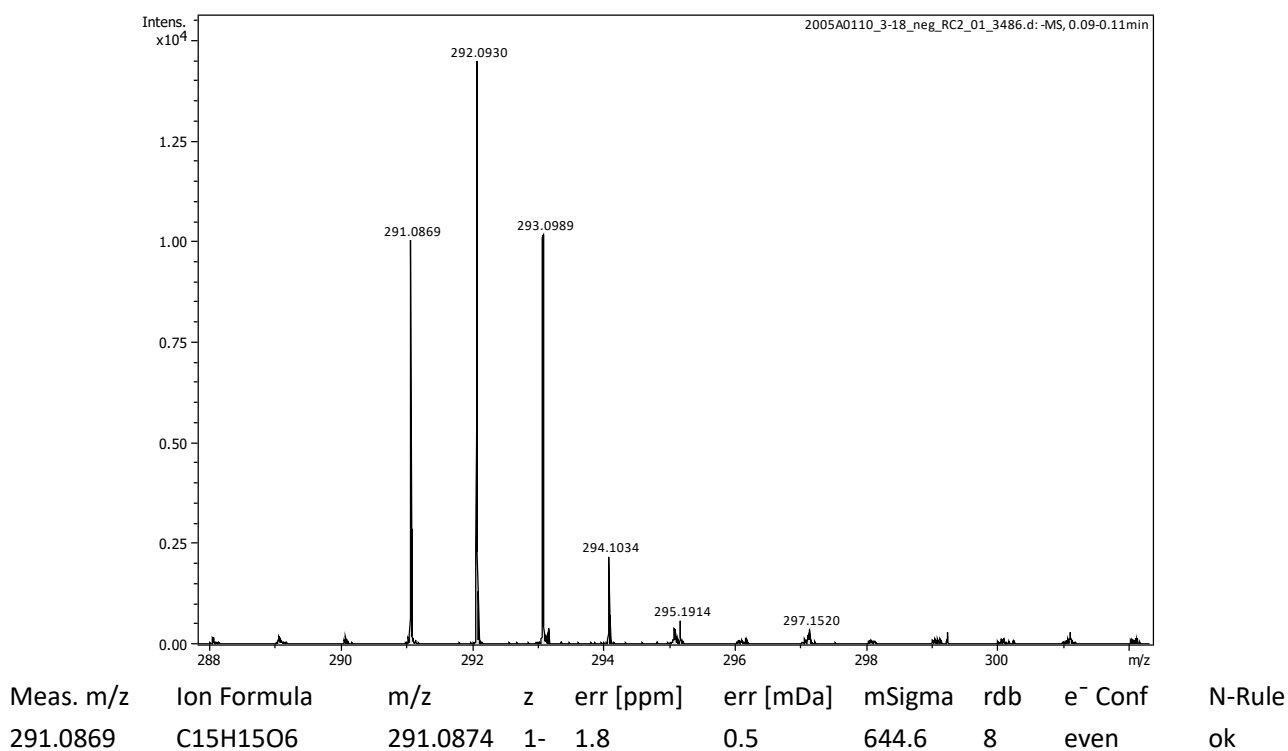

**Figure S1.** The HRESIMS spectrum of compound **1**.

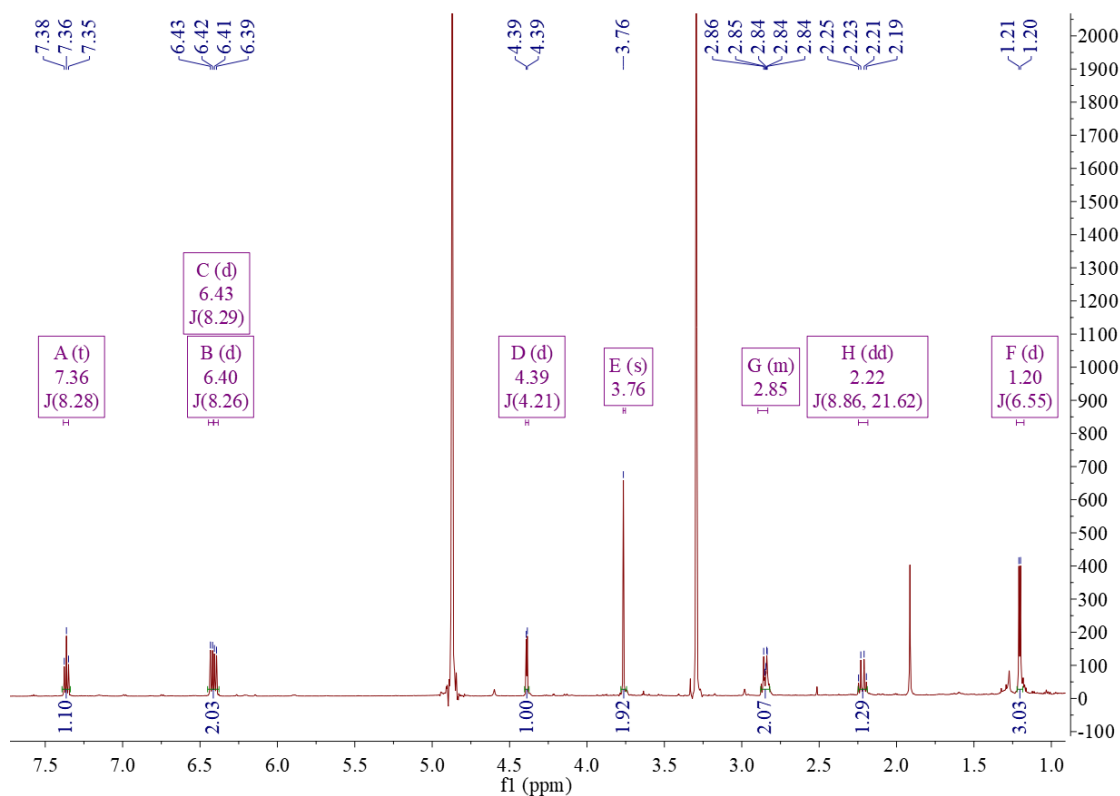

**Figure S2.** The <sup>1</sup>H NMR (600MHz) spectrum of compound **1** in CD<sub>3</sub>OD.

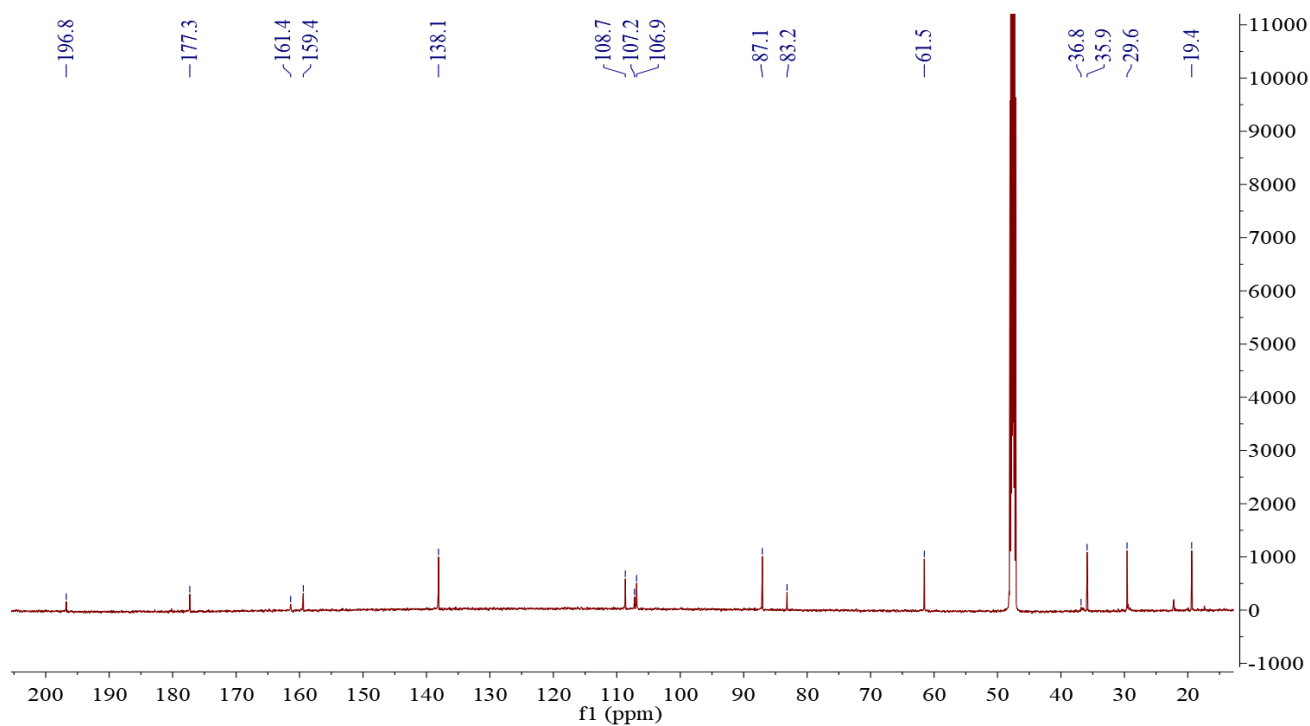

**Figure S3.** The  $^{13}\text{C}$  NMR (150MHz) spectrum of compound **1** in  $\text{CD}_3\text{OD}$ .

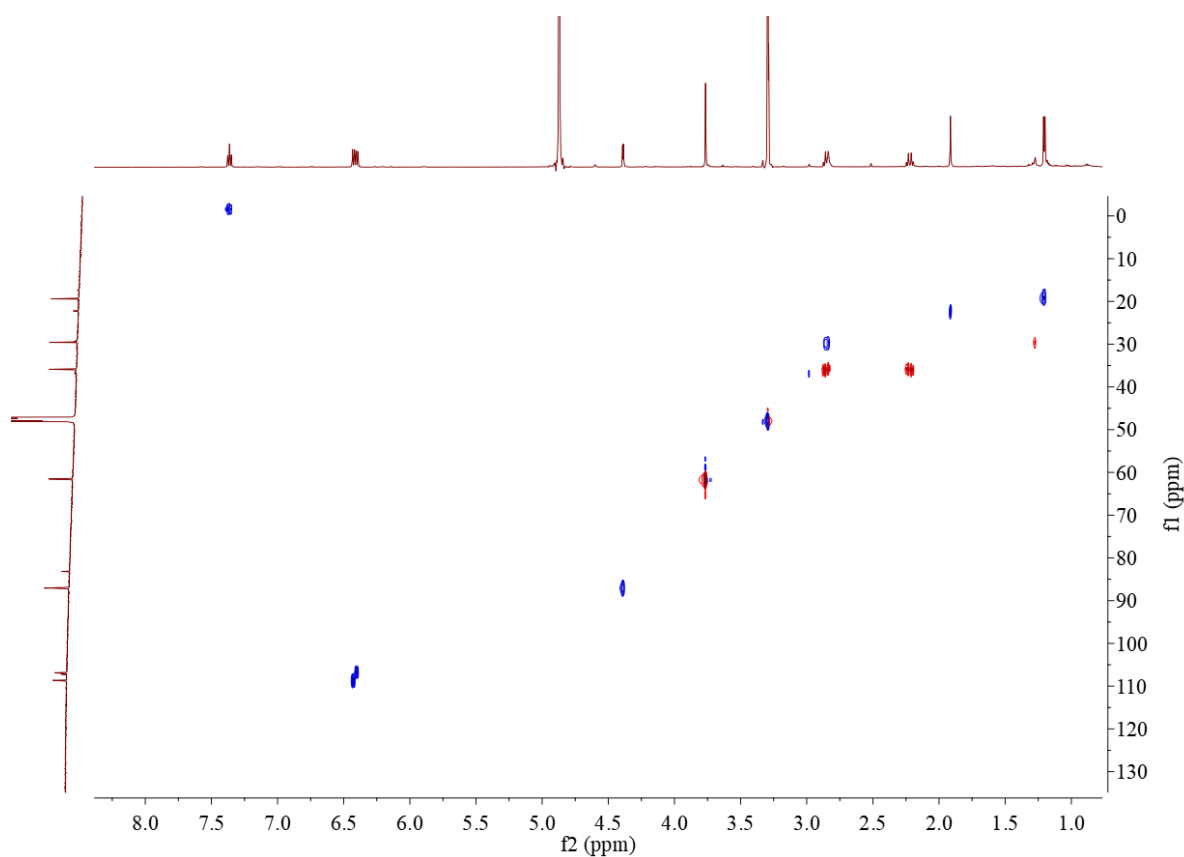

**Figure S4.** The HSQC spectrum of compound **1** in  $\text{CD}_3\text{OD}$ .

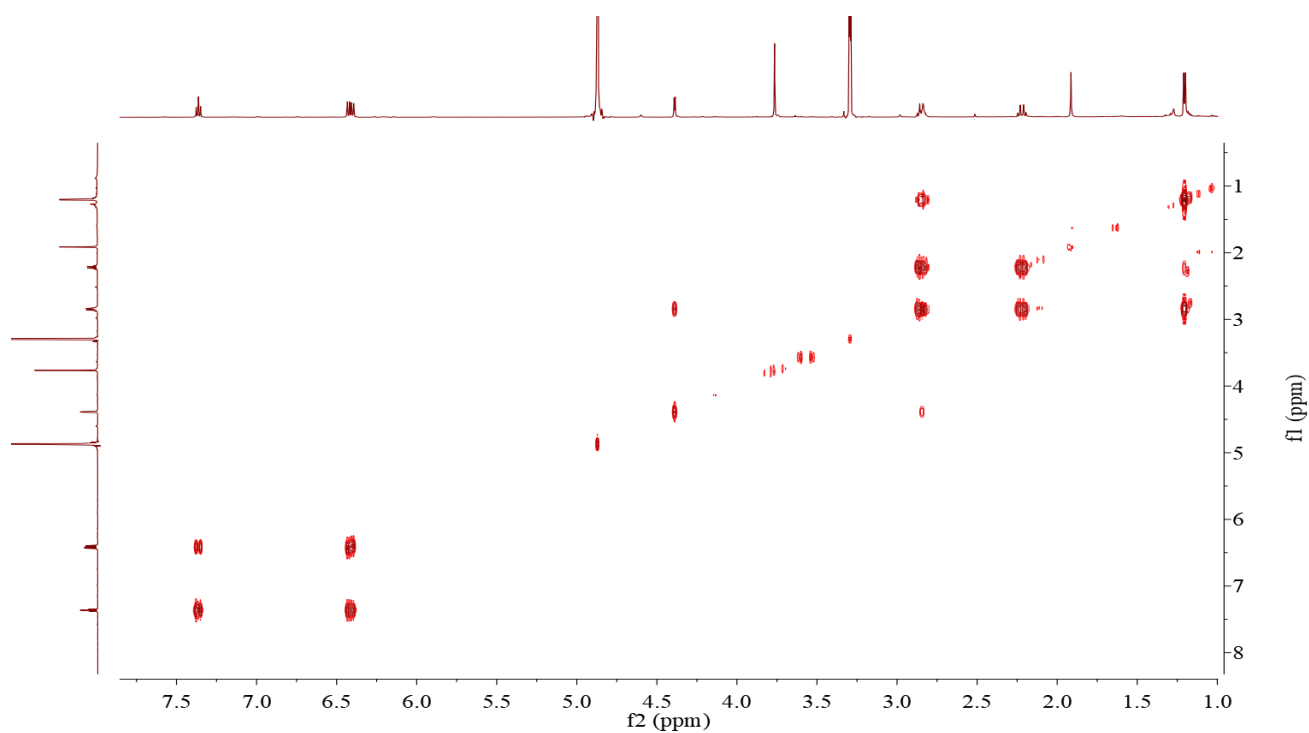

**Figure S5.** The  $^1\text{H}$ - $^1\text{H}$  COSY spectrum of compound **1** in  $\text{CD}_3\text{OD}$ .

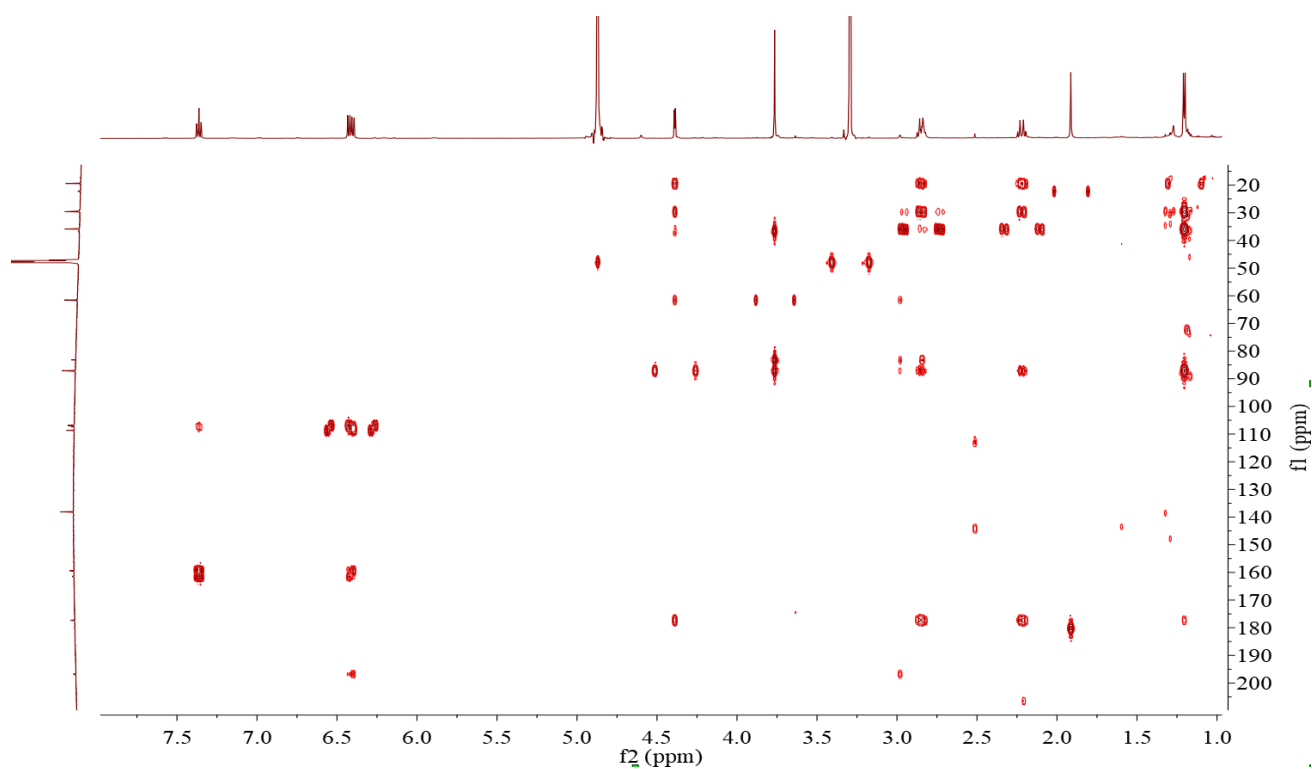

**Figure S6.** The HMBC spectrum of compound **1** in  $\text{CD}_3\text{OD}$ .

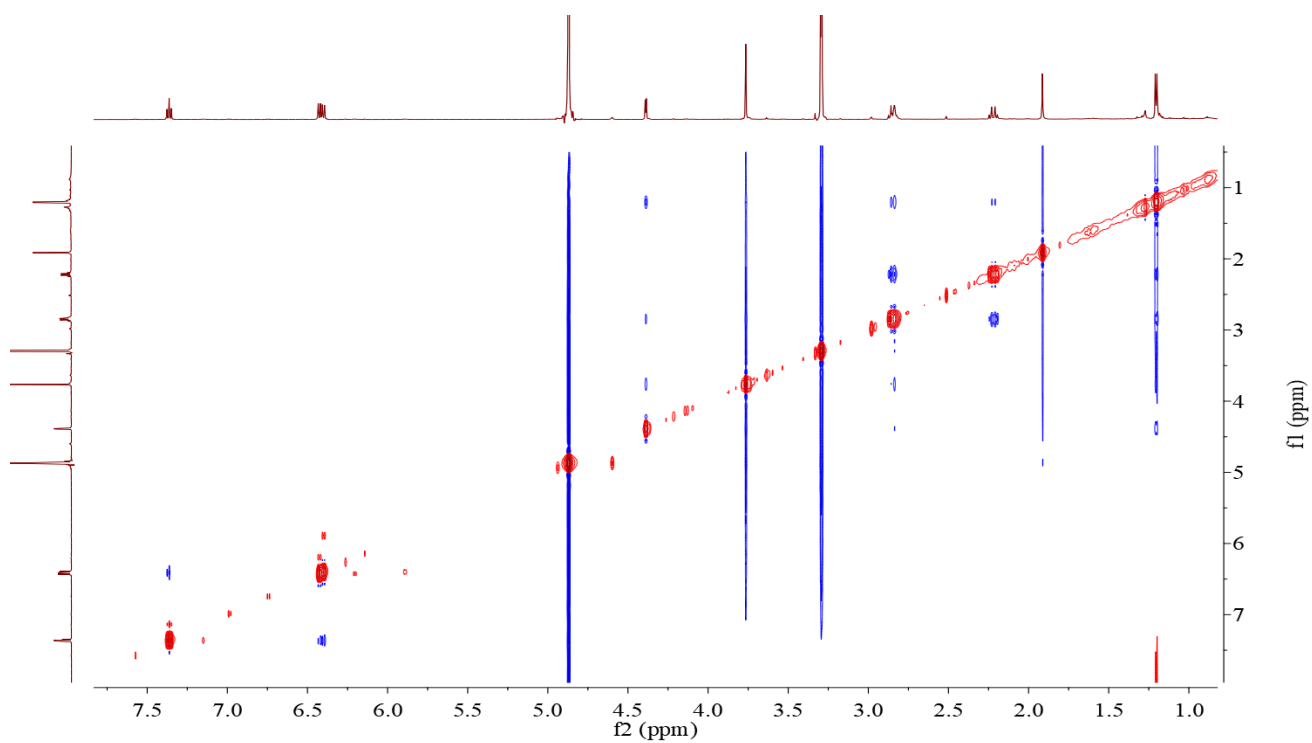

**Figure S7.** The NOESY spectrum of compound **1** in CD<sub>3</sub>OD

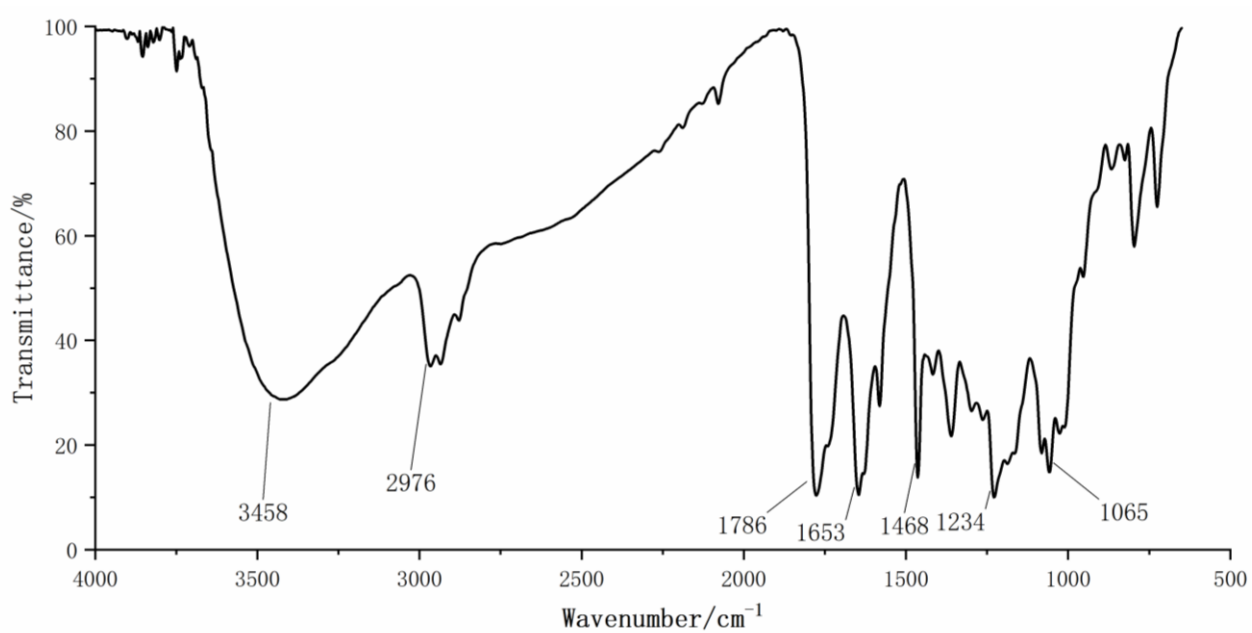

**Figure S8.** The IR spectrum of compound **1**

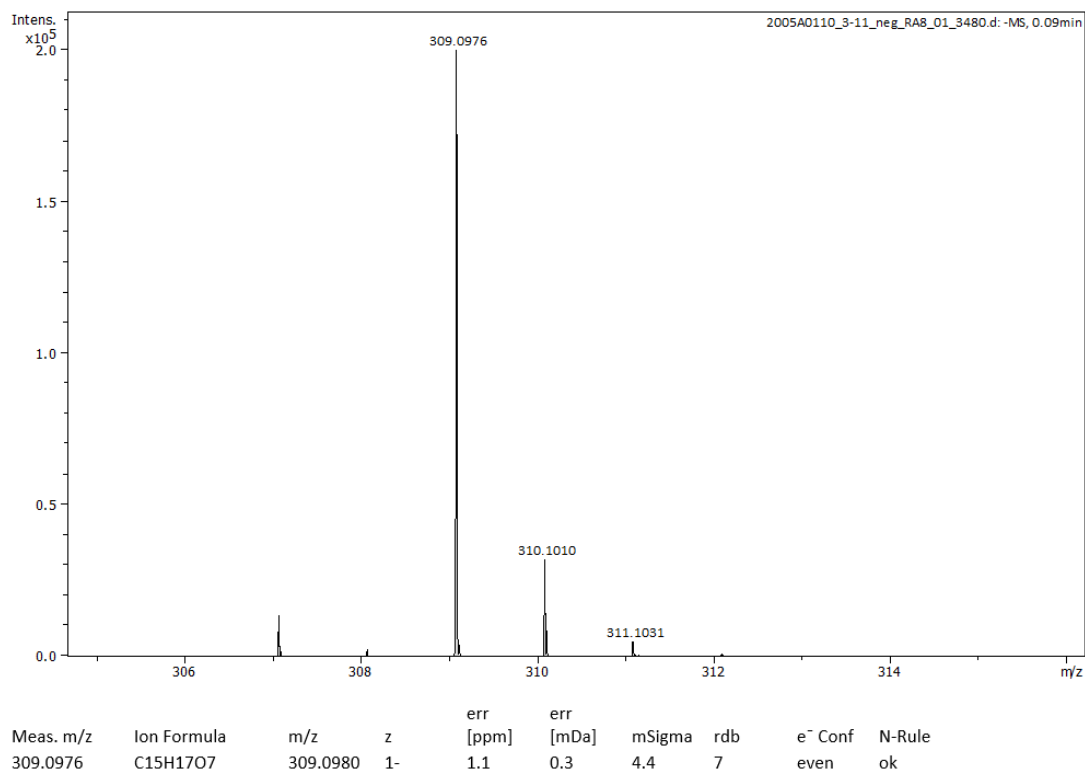

**Figure S9.** The HRESIMS spectrum of compound **2**.

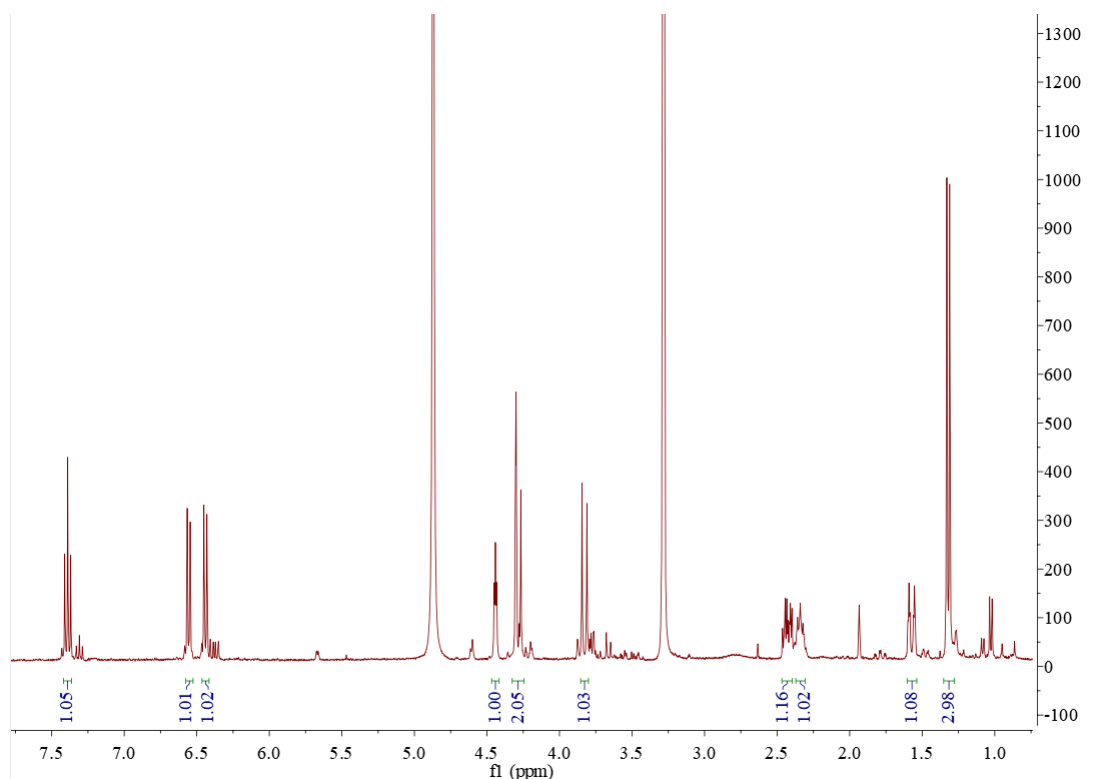

**Figure S10.** The <sup>1</sup>H NMR (400MHz) spectrum of compound **2** in CD<sub>3</sub>OD.



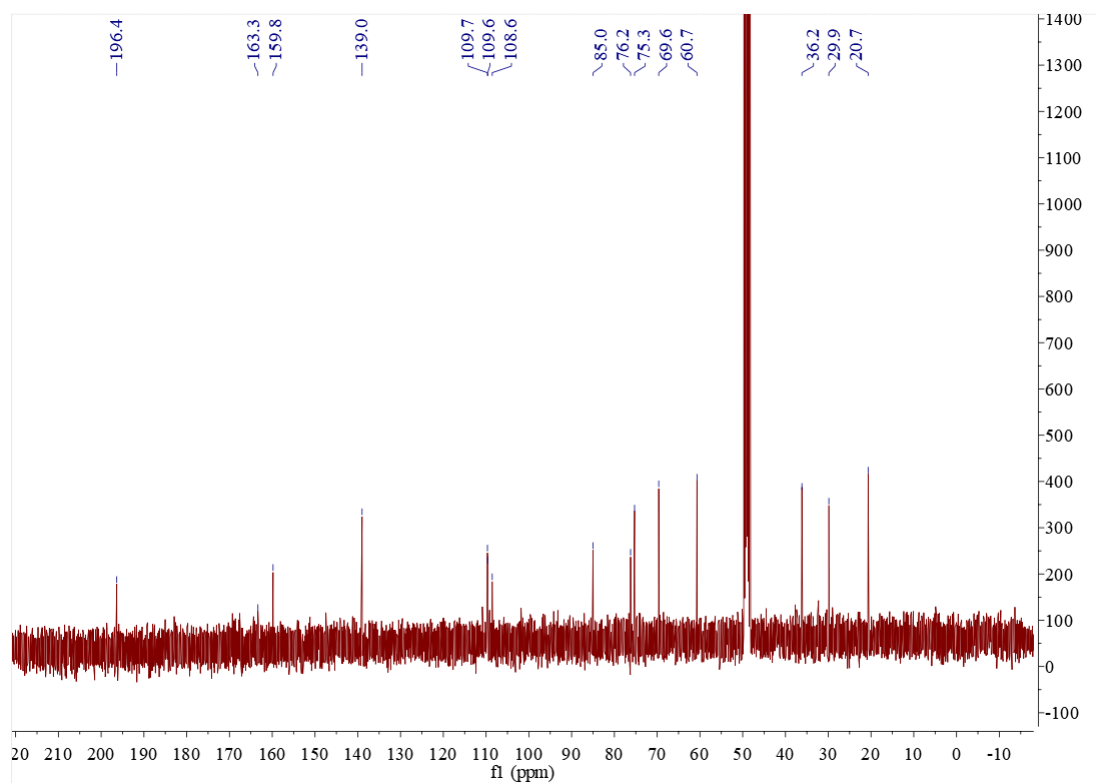

**Figure S11.** The <sup>13</sup>C NMR (100MHz) spectrum of compound **2** in CD<sub>3</sub>OD.

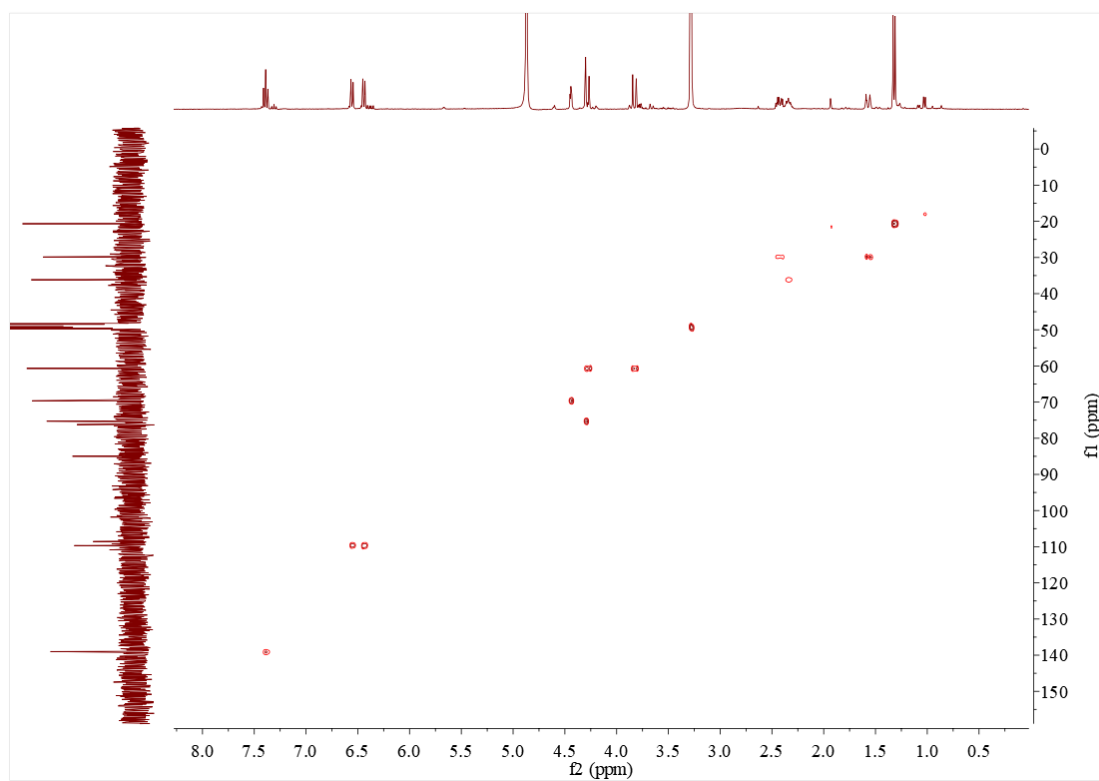

**Figure S12.** The HSQC spectrum of compound **2** in CD<sub>3</sub>OD.

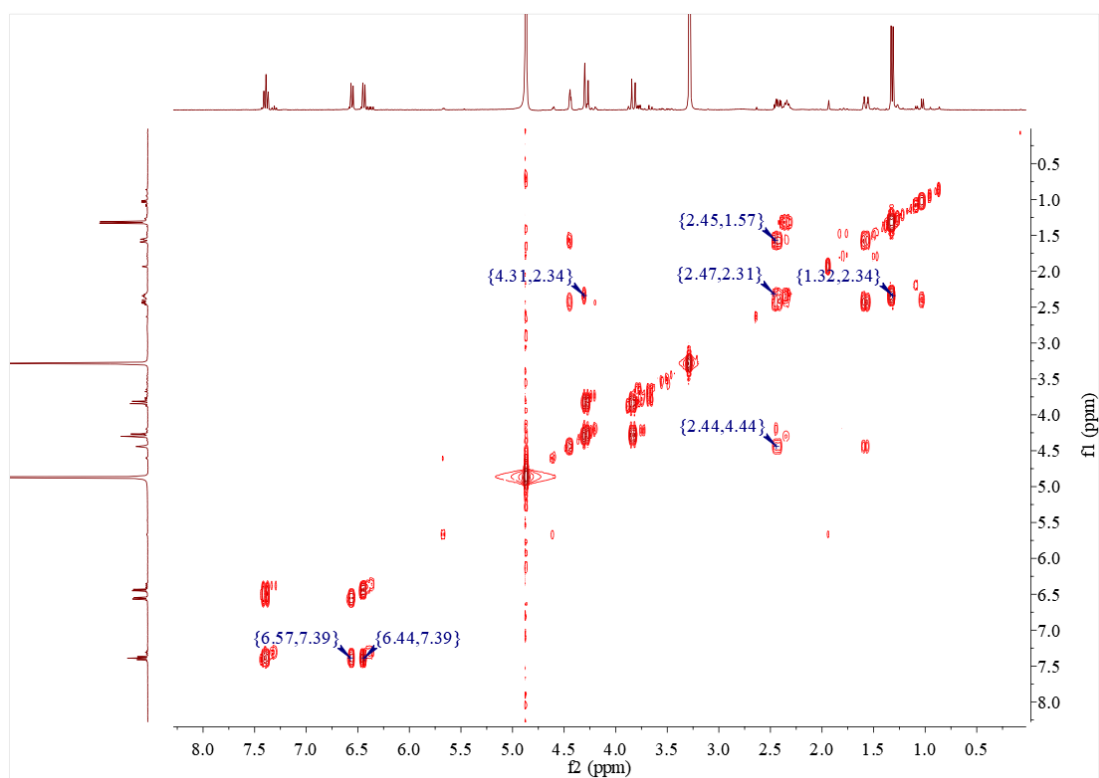

**Figure S13.** The  $^1\text{H}$ - $^1\text{H}$  COSY spectrum of compound **2** in  $\text{CD}_3\text{OD}$ .

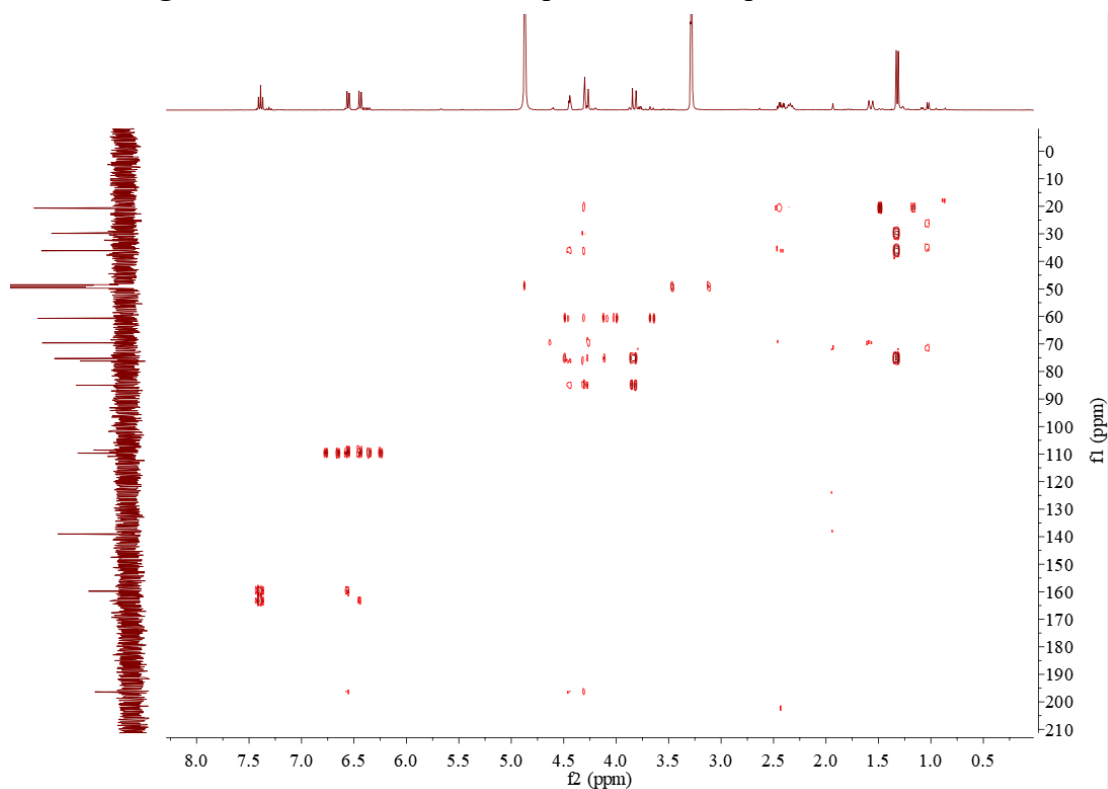

**Figure S14.** The HMBC spectrum of compound **2** in  $\text{CD}_3\text{OD}$ .

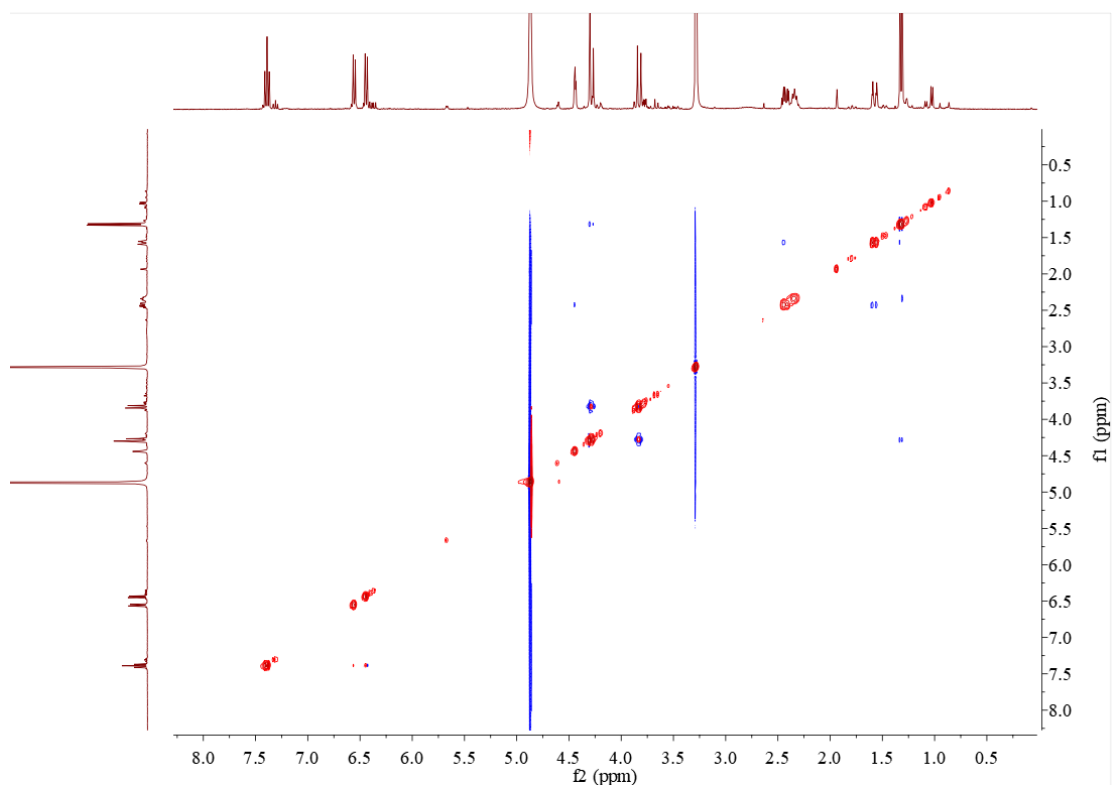

**Figure S15.** The NOESY spectrum of compound **2** in CD<sub>3</sub>OD.

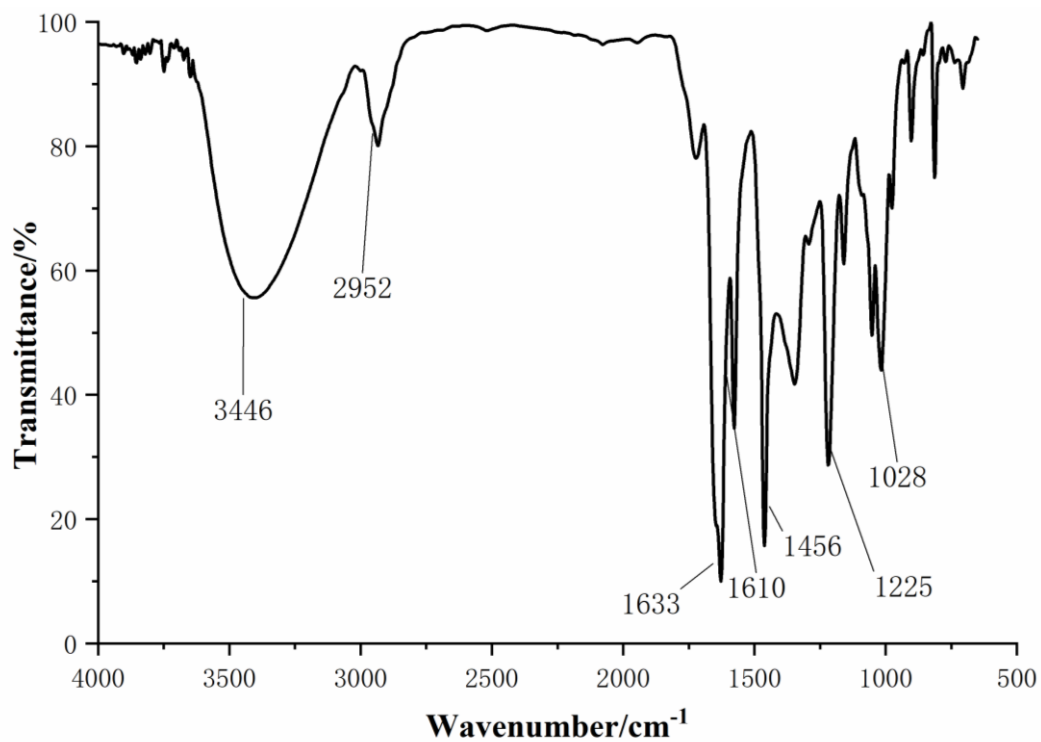

**Figure S16.** The IR spectrum of compound **2**

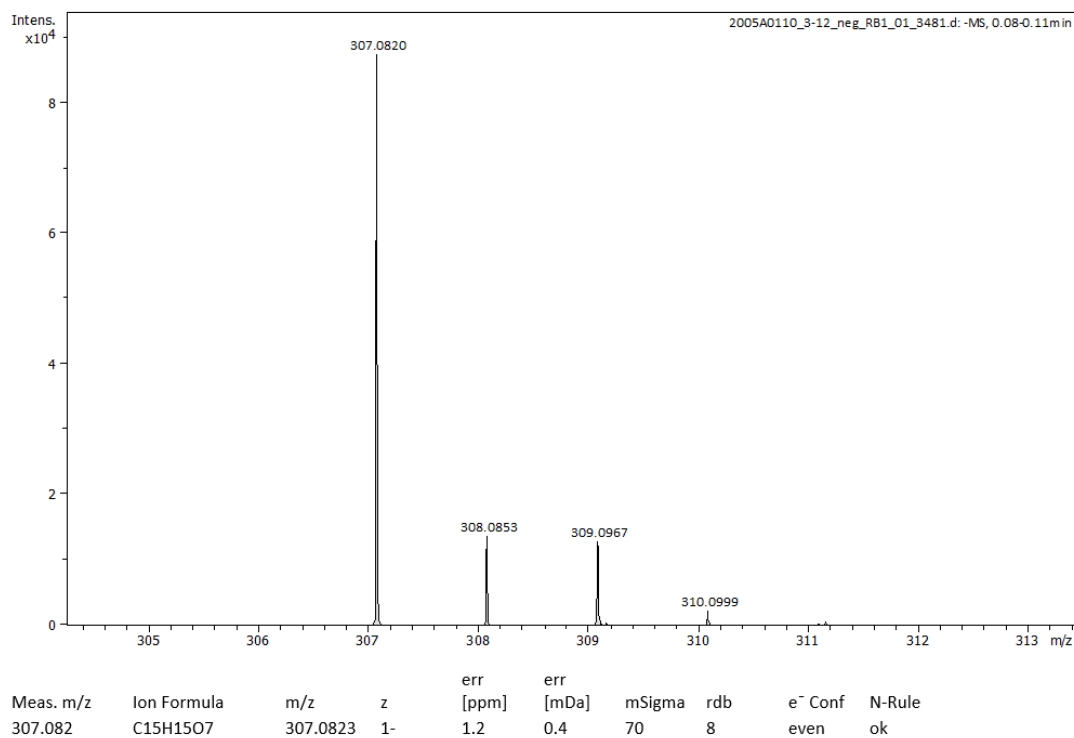

**Figure S17.** The HRESIMS spectrum of compound **3**.

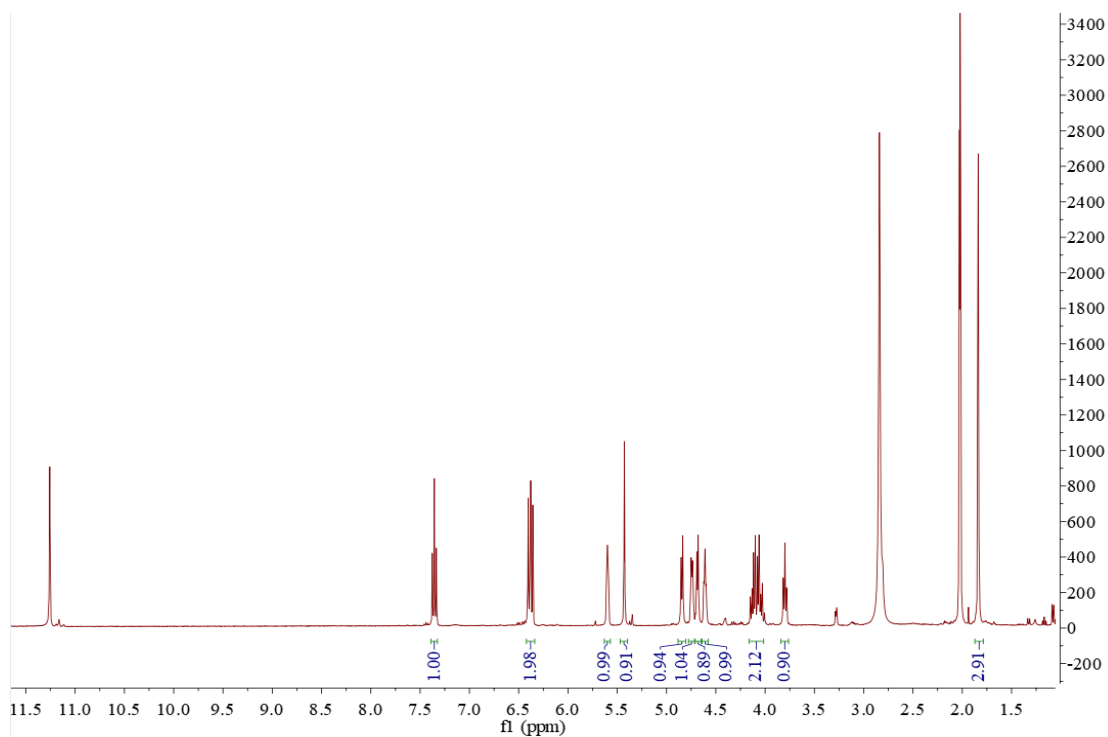

**Figure S18.** The <sup>1</sup>H NMR (400MHz) spectrum of compound **3** in acetone-*d*<sub>6</sub>.

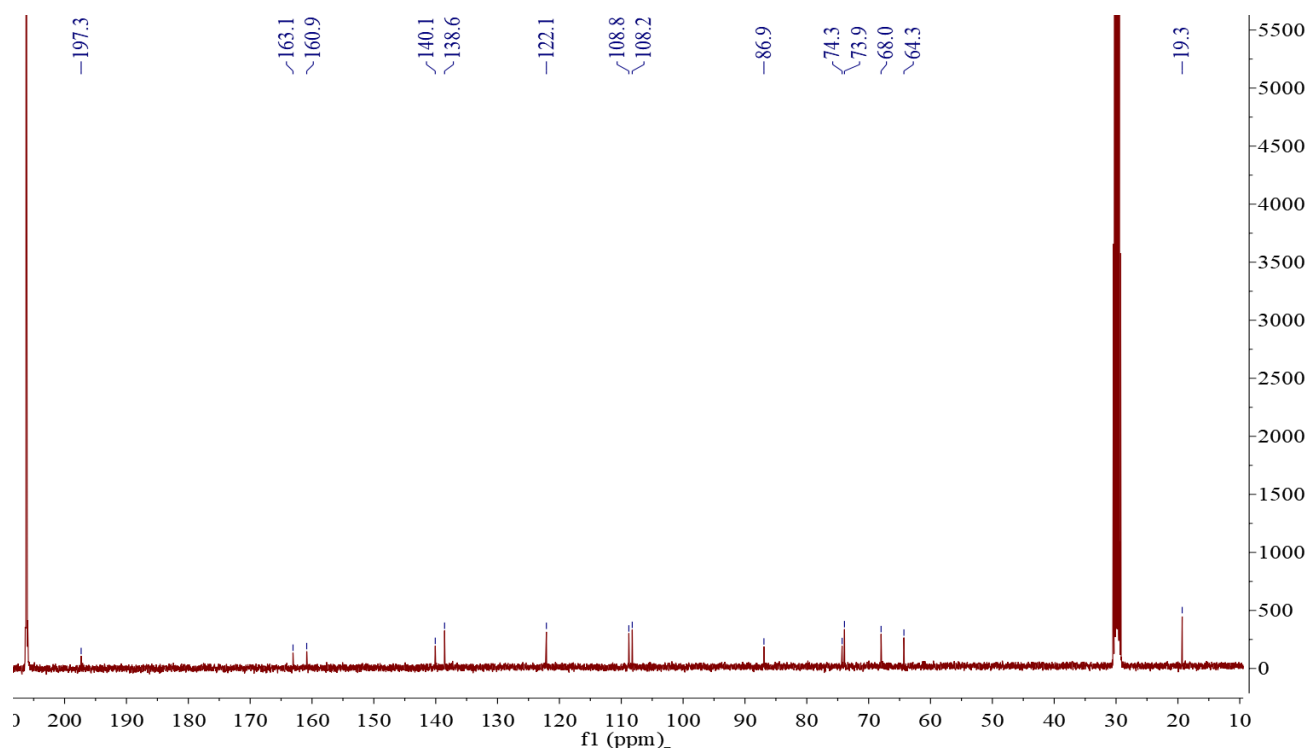

**Figure S19.** The <sup>13</sup>C NMR (100MHz) spectrum of compound **3** in acetone-*d*<sub>6</sub>.

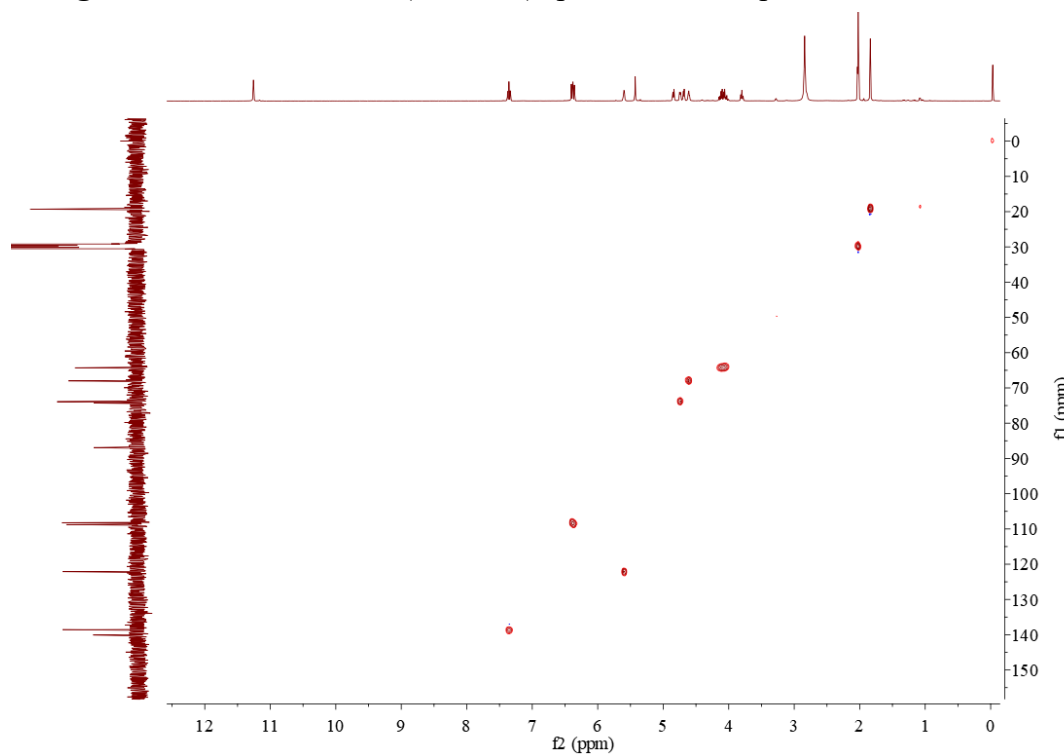

**Figure S20.** The HSQC spectrum of compound **3** in acetone-*d*<sub>6</sub>.

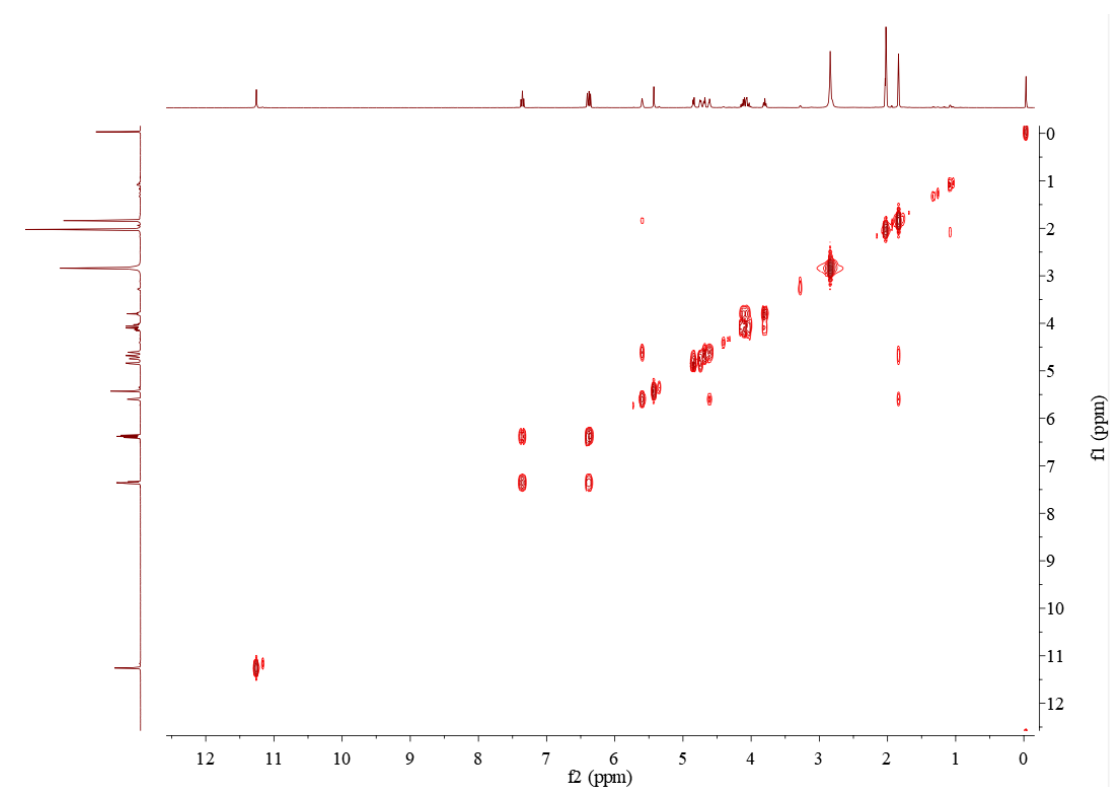

**Figure S21.** The  $^1\text{H}$ - $^1\text{H}$  COSY spectrum of compound **3** in acetone- $d_6$ .

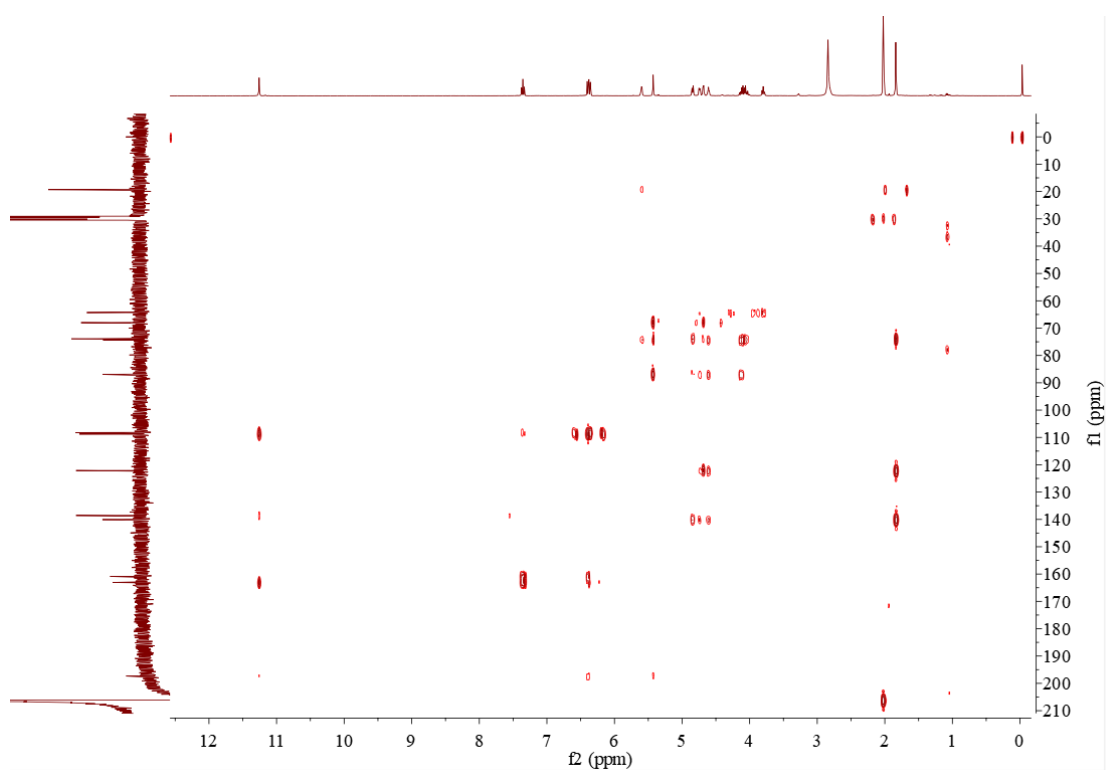

**Figure S22.** The HMBC spectrum of compound **3** in acetone- $d_6$ .

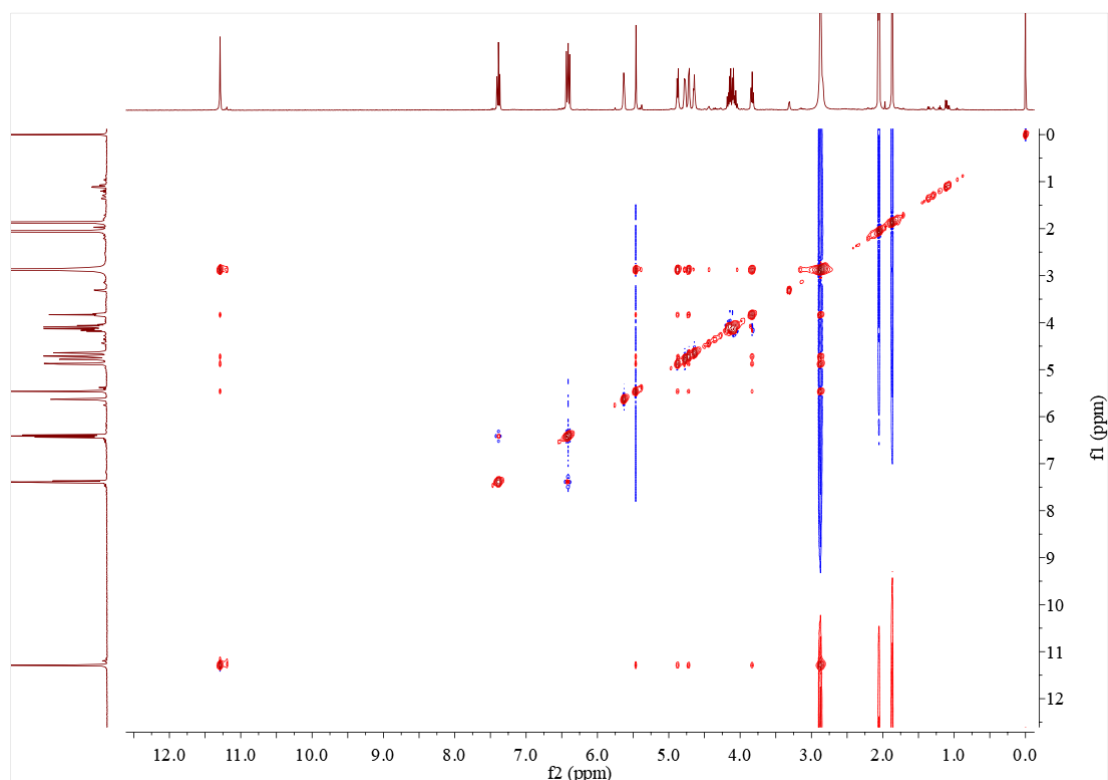

**Figure S23.** The NOESY spectrum of compound **3** in acetone- $d_6$ .

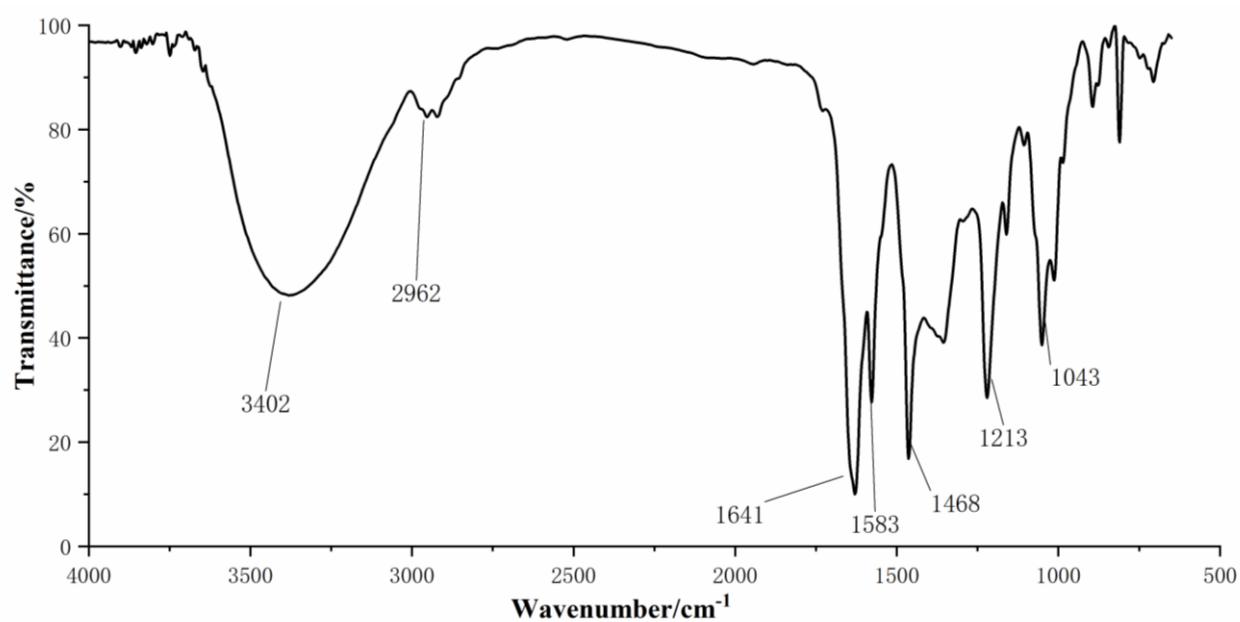

**Figure S24.** IR spectrum of compound **3**.

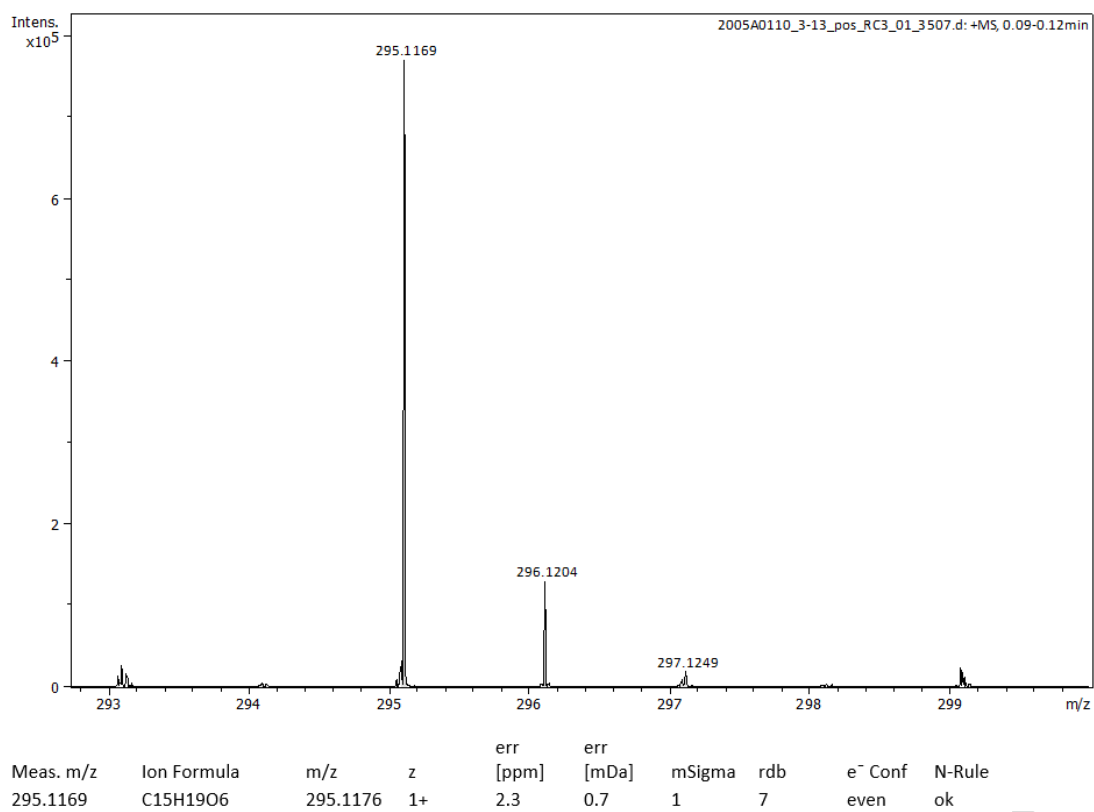

**Figure S25.** The HRESIMS spectrum of compound **4**.

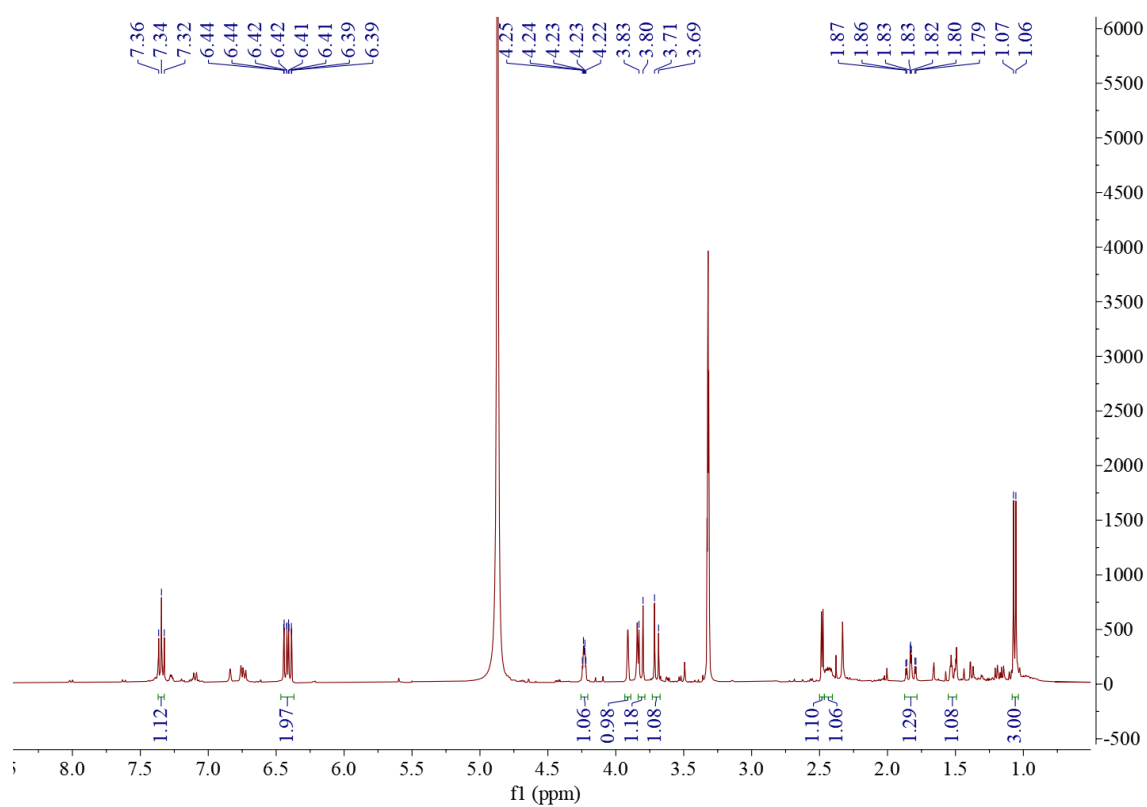

**Figure S26.** The <sup>1</sup>H NMR (400MHz) spectrum of compound **4** in CD<sub>3</sub>OD.



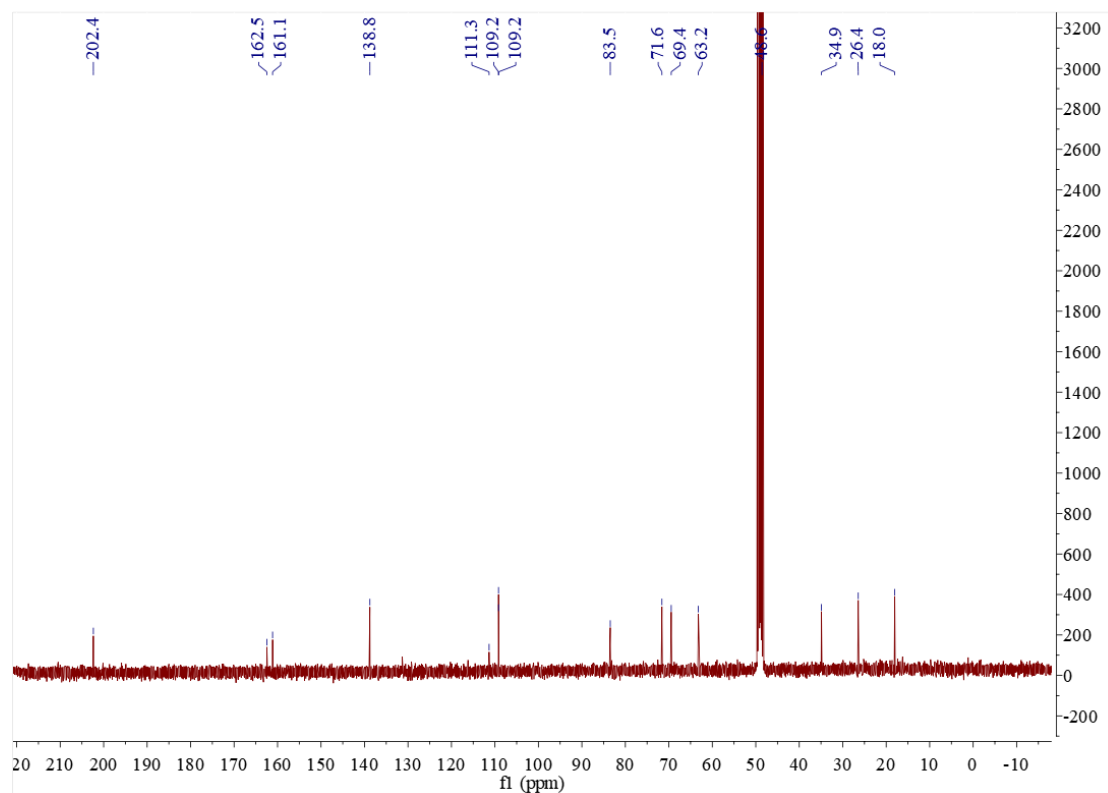

**Figure S27.** The <sup>13</sup>C NMR (100MHz) spectrum of compound **4** in CD<sub>3</sub>OD.

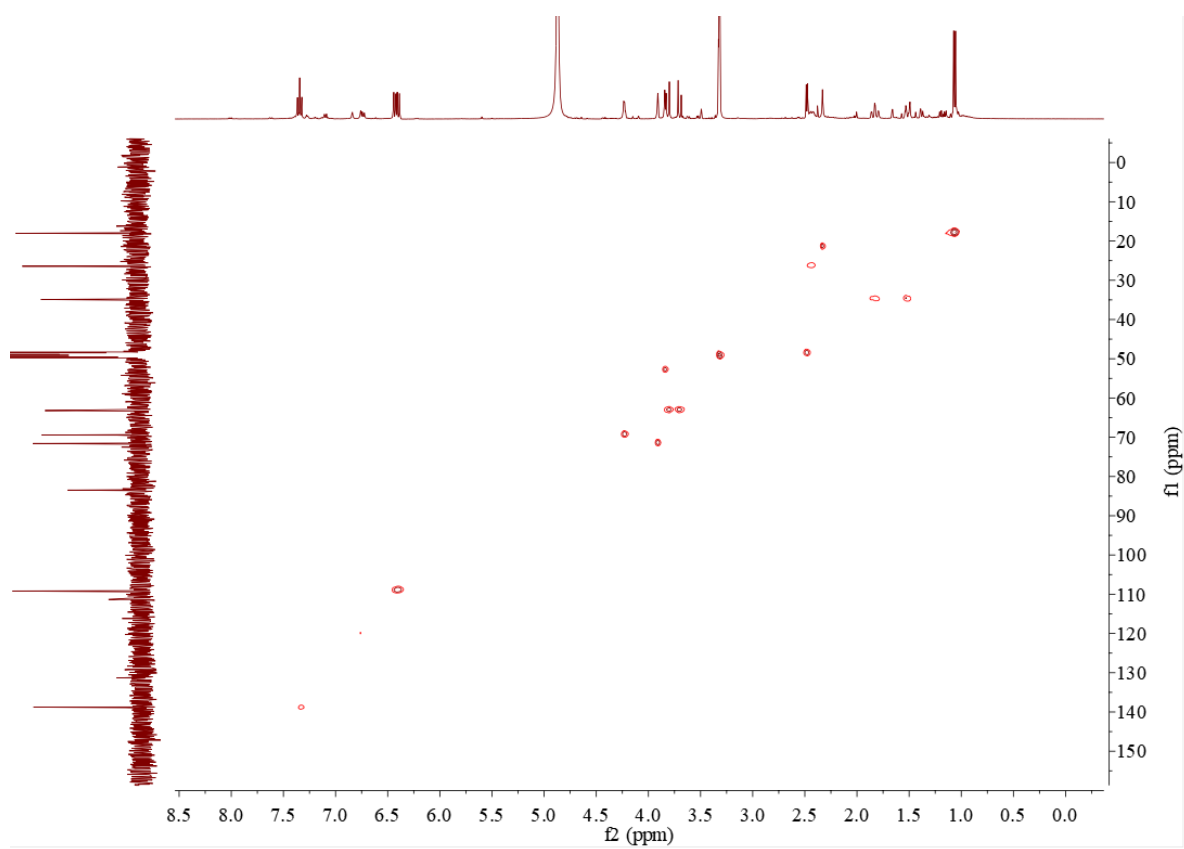

**Figure S28.** The HSQC spectrum of compound **4** in CD<sub>3</sub>OD.

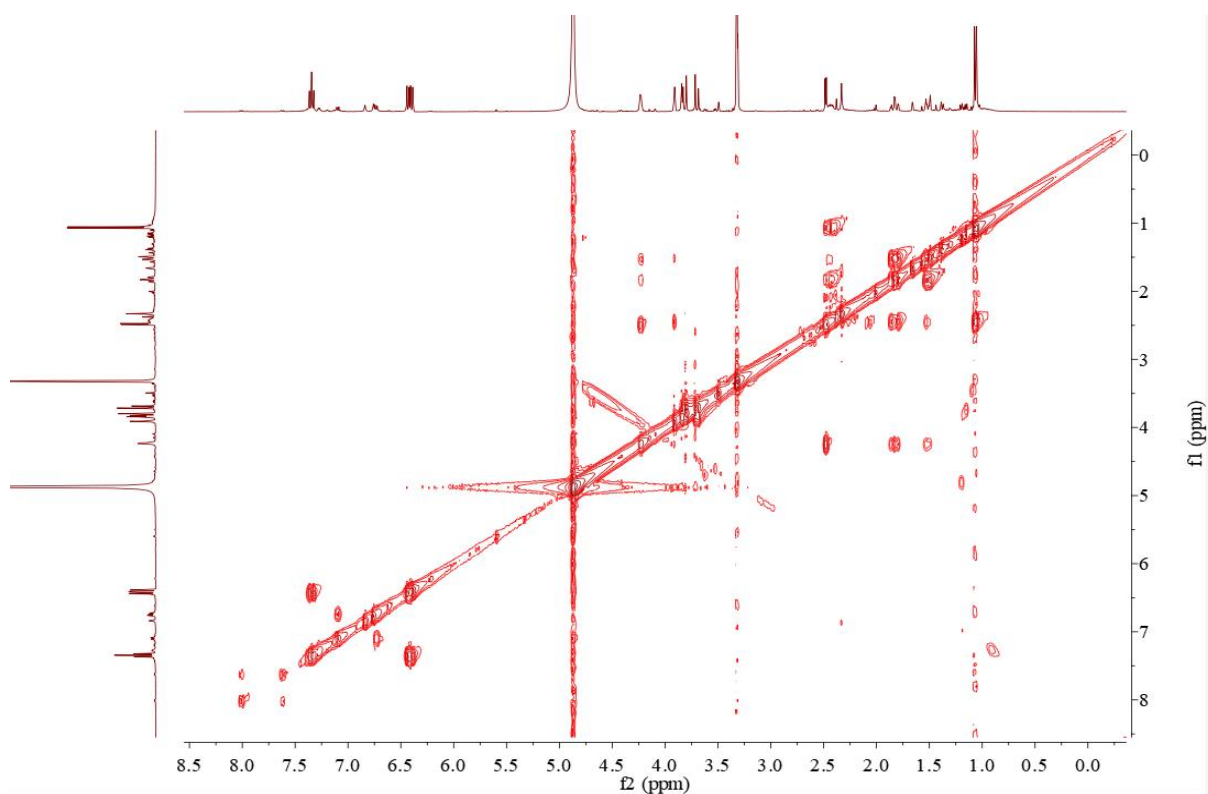

**Figure S29.** The  $^1\text{H}$ - $^1\text{H}$  COSY spectrum of compound **4** in  $\text{CD}_3\text{OD}$ .

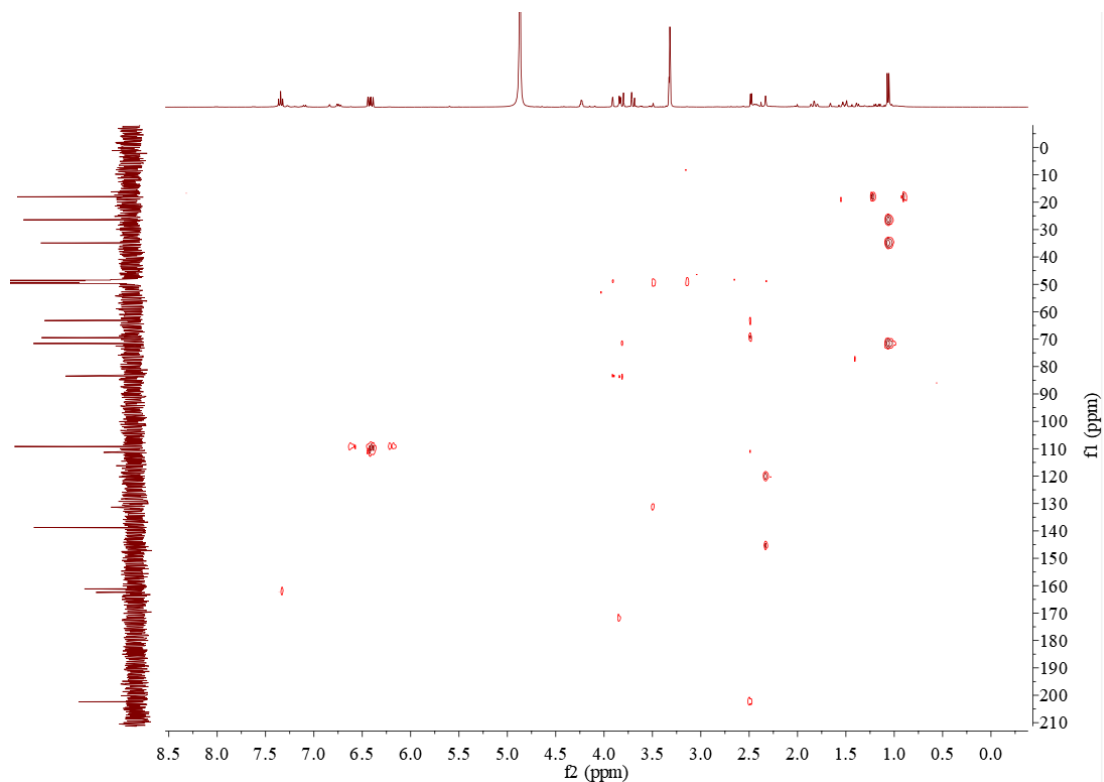

**Figure S30.** The HMBC spectrum of compound **4** in  $\text{CD}_3\text{OD}$ .

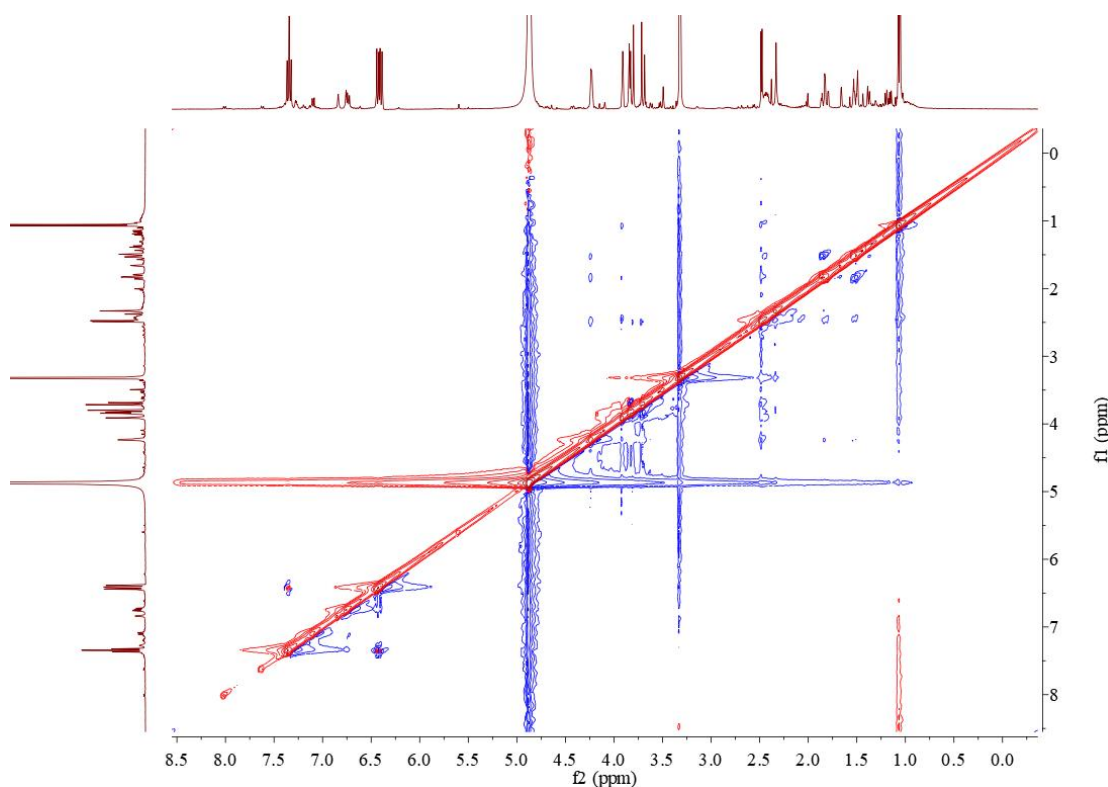

**Figure S31.** The NOESY spectrum of compound **4** in CD<sub>3</sub>OD.

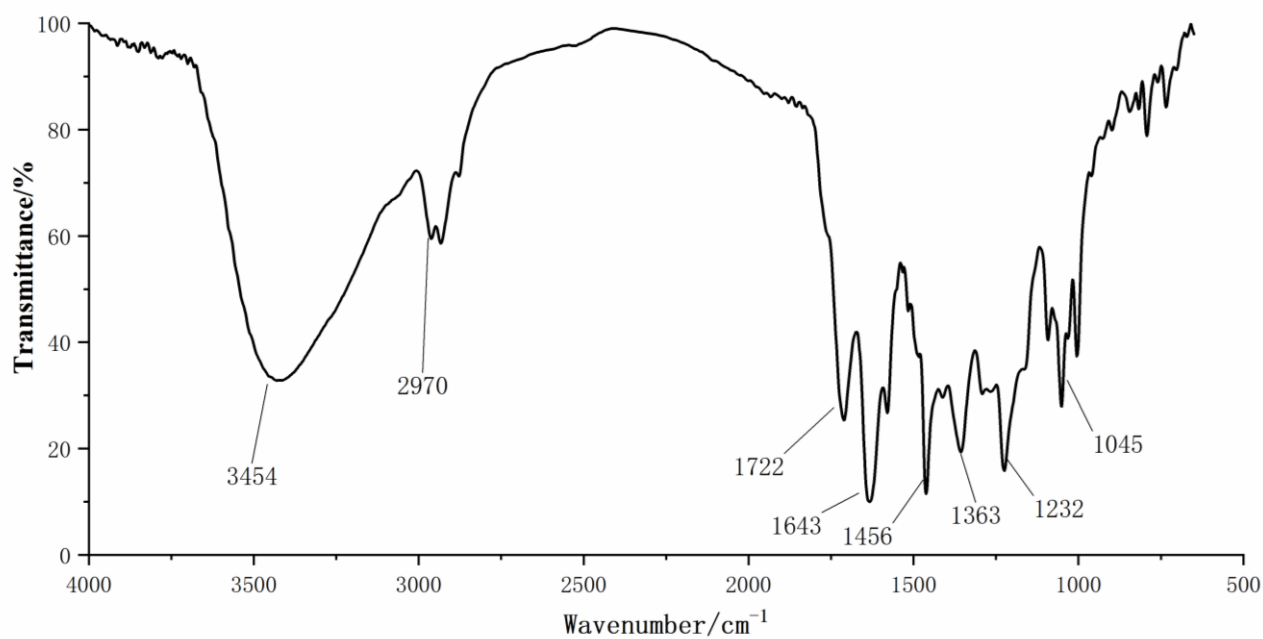

**Figure S32.** IR spectrum of compound **4**.

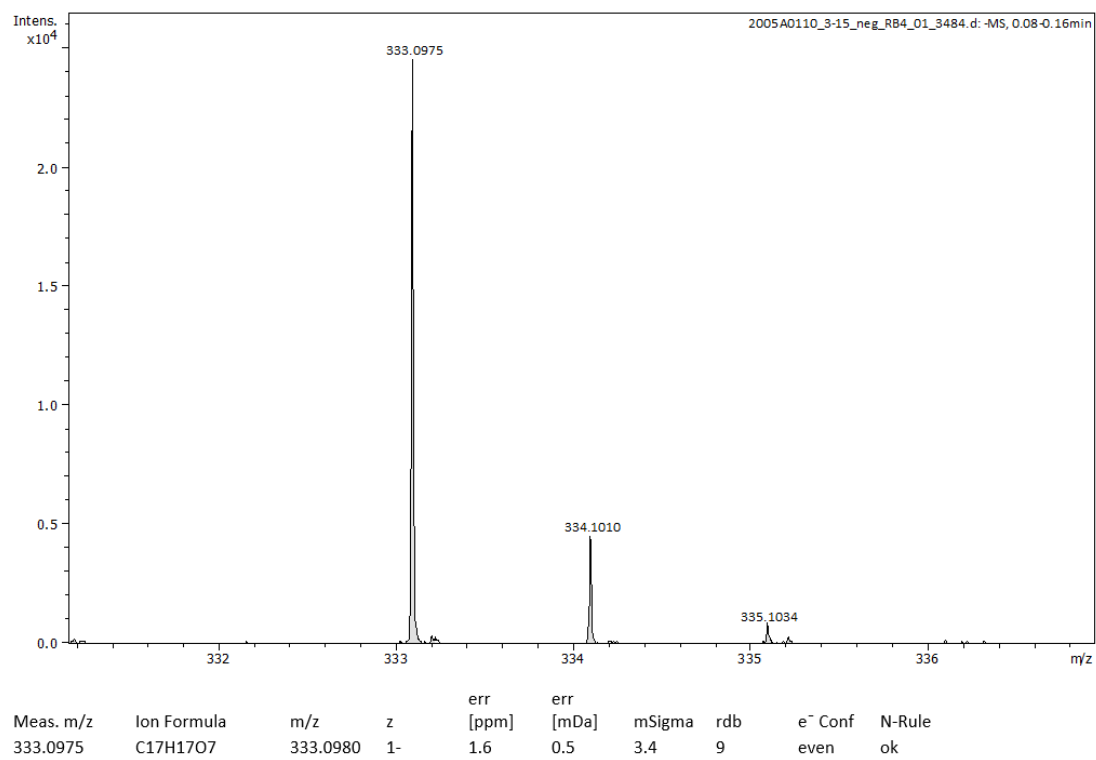

**Figure S33.** The HRESIMS spectrum of compound **5**.

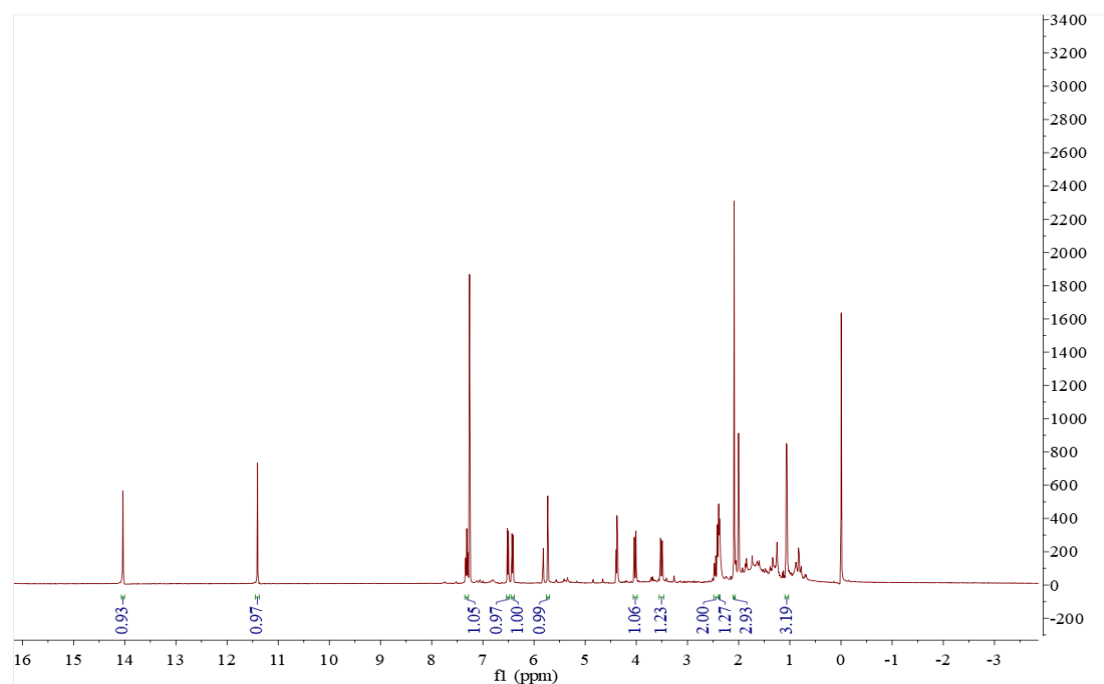

**Figure S34.** The <sup>1</sup>H NMR (400MHz) spectrum of compound **5** in CDCl<sub>3</sub>.

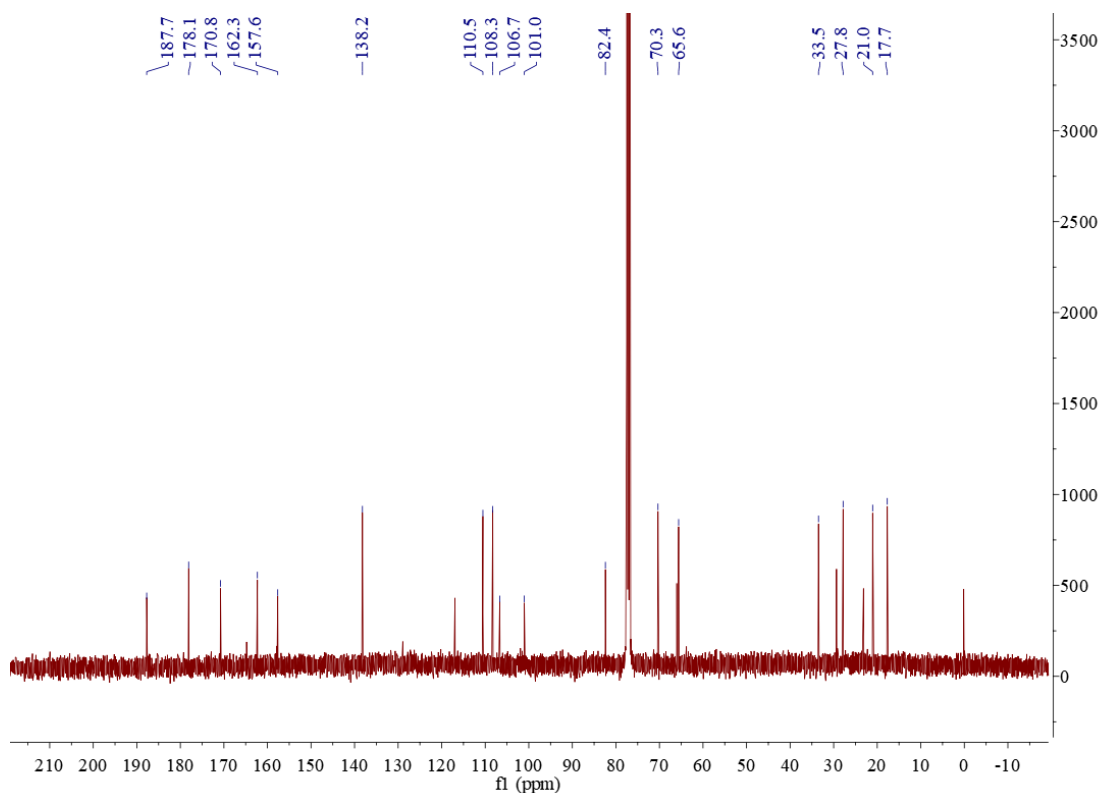

**Figure S35.** The  $^{13}\text{C}$  NMR (100MHz) spectrum of compound **5** in  $\text{CDCl}_3$ .

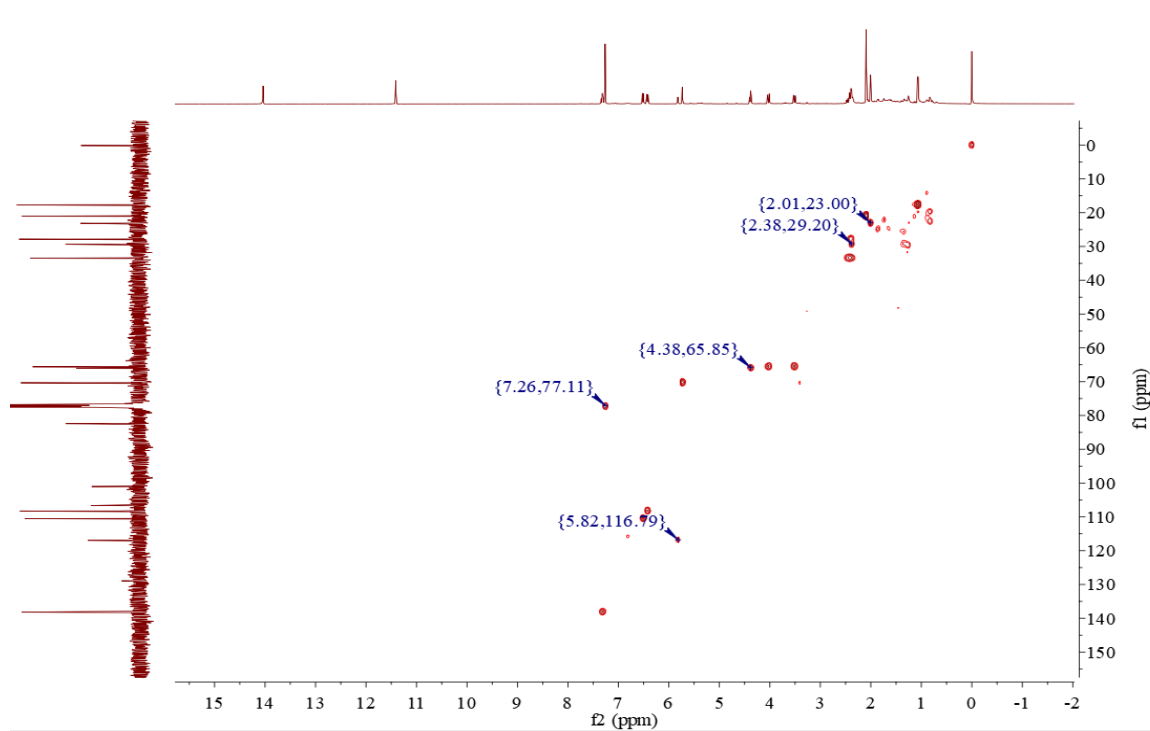

**Figure S36.** The HSQC spectrum of compound **5** in  $\text{CDCl}_3$ .

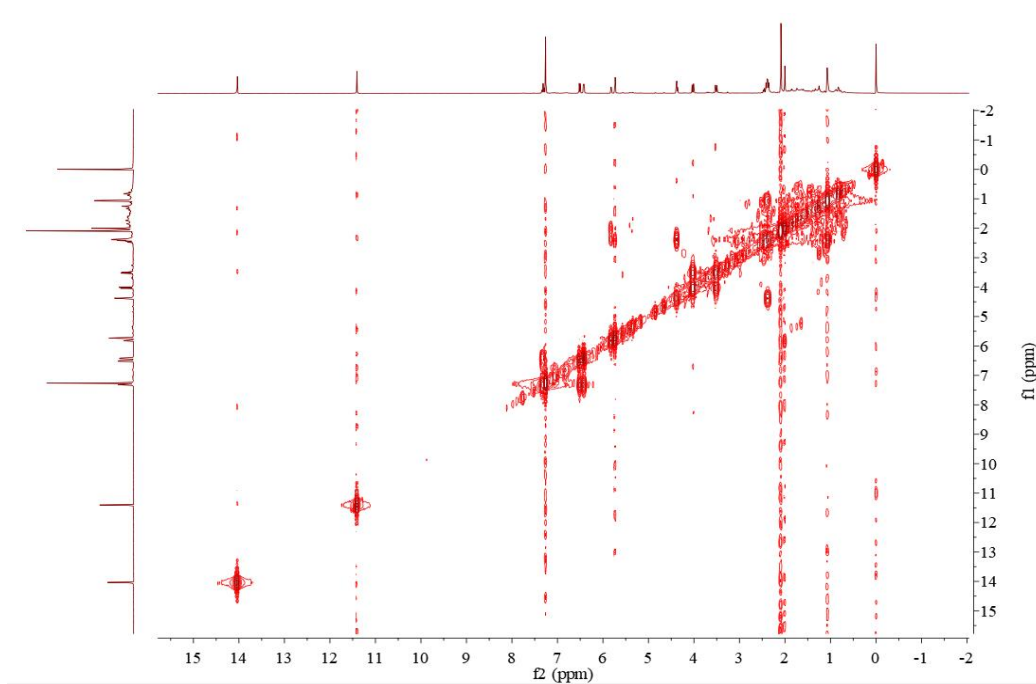

**Figure S37.** The  $^1\text{H}$ - $^1\text{H}$  COSY spectrum of compound **5** in  $\text{CDCl}_3$ .

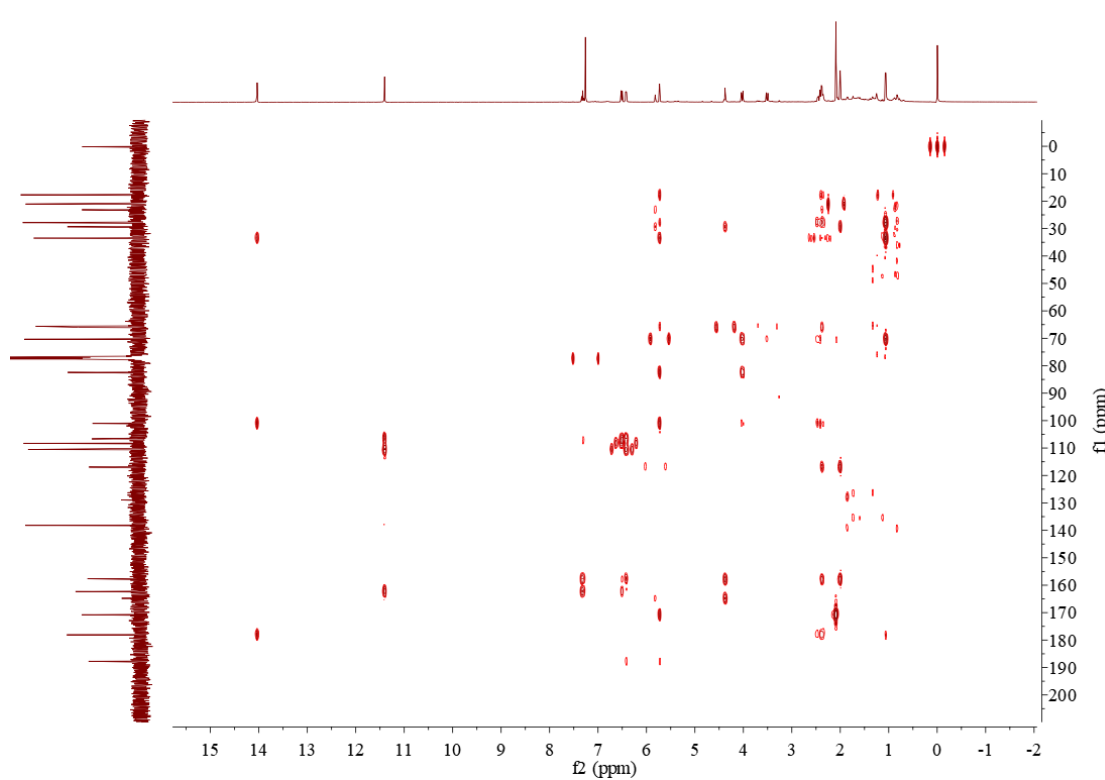

**Figure S38.** The HMBC spectrum of compound **5** in  $\text{CDCl}_3$ .

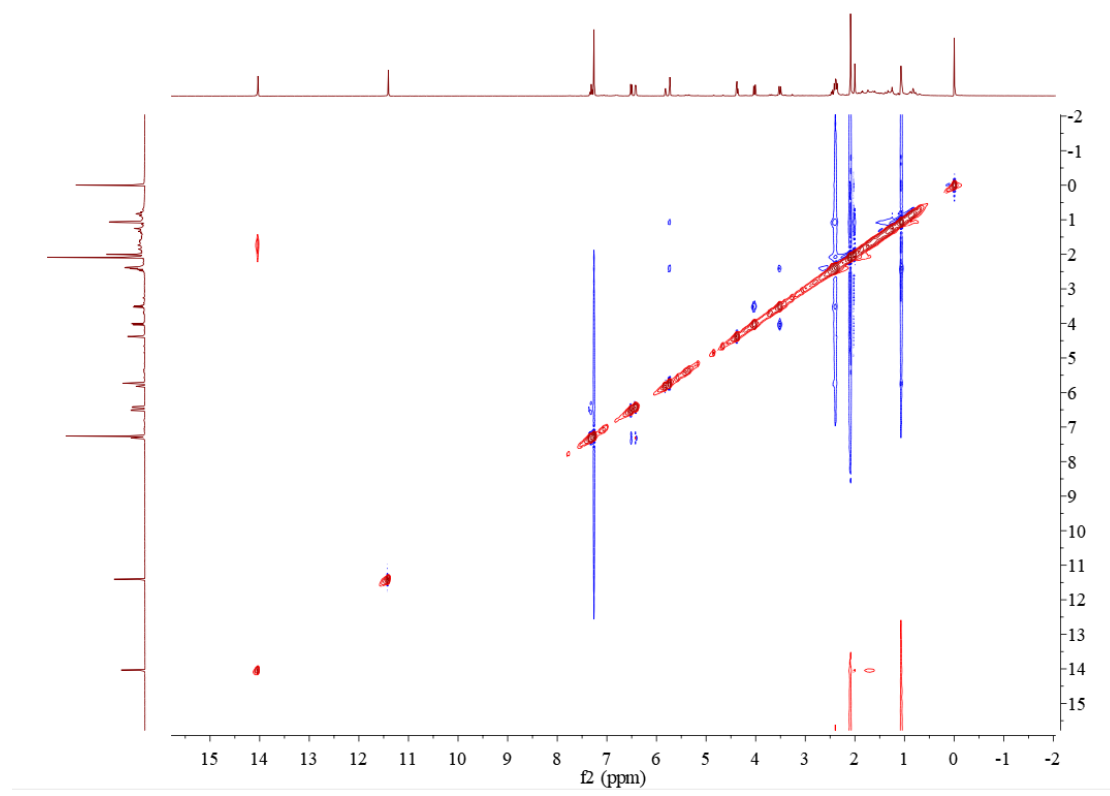

**Figure S39.** The NOESY spectrum of compound **5** in CDCl<sub>3</sub>.

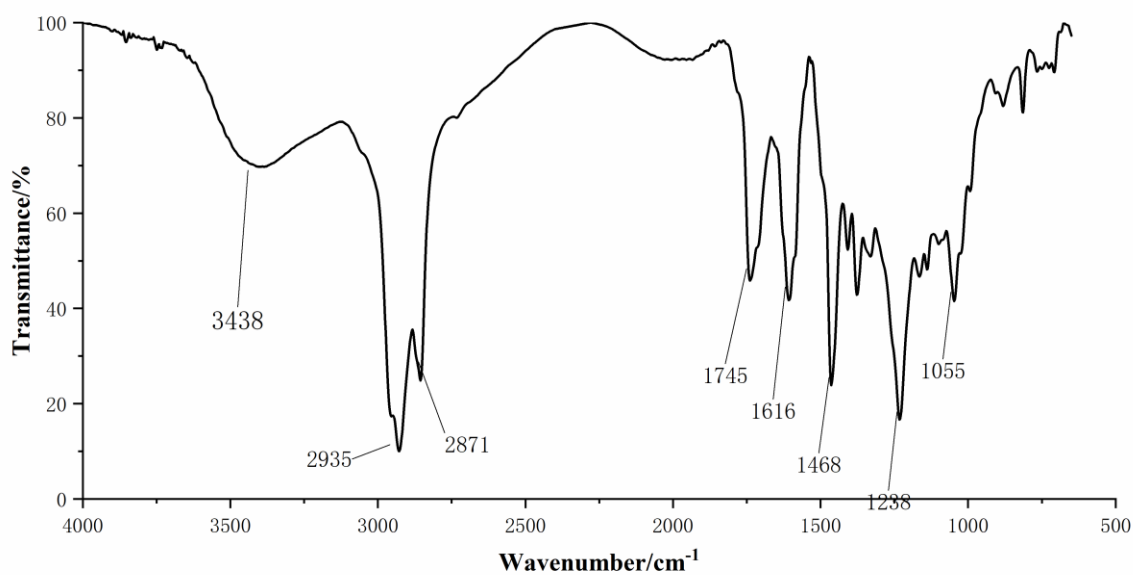

**Figure S40.** IR spectrum of compound **5**.

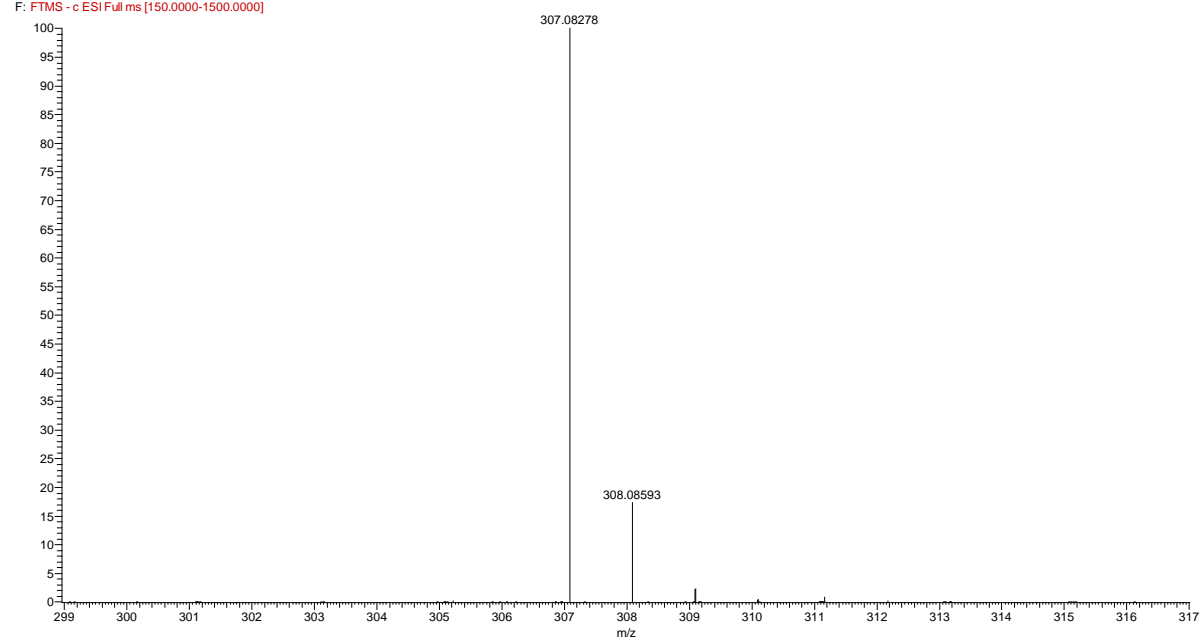

SPECTRUM - simulation :

| m/z       | Theo. Mass | Delta (ppm) | RDB equiv. | Composition |
|-----------|------------|-------------|------------|-------------|
| 307.08278 | 307.08233  | 1.48        | 8.5        | C15 H15 O7  |

**Figure S41.** The HRESIMS spectrum of compound **6**.

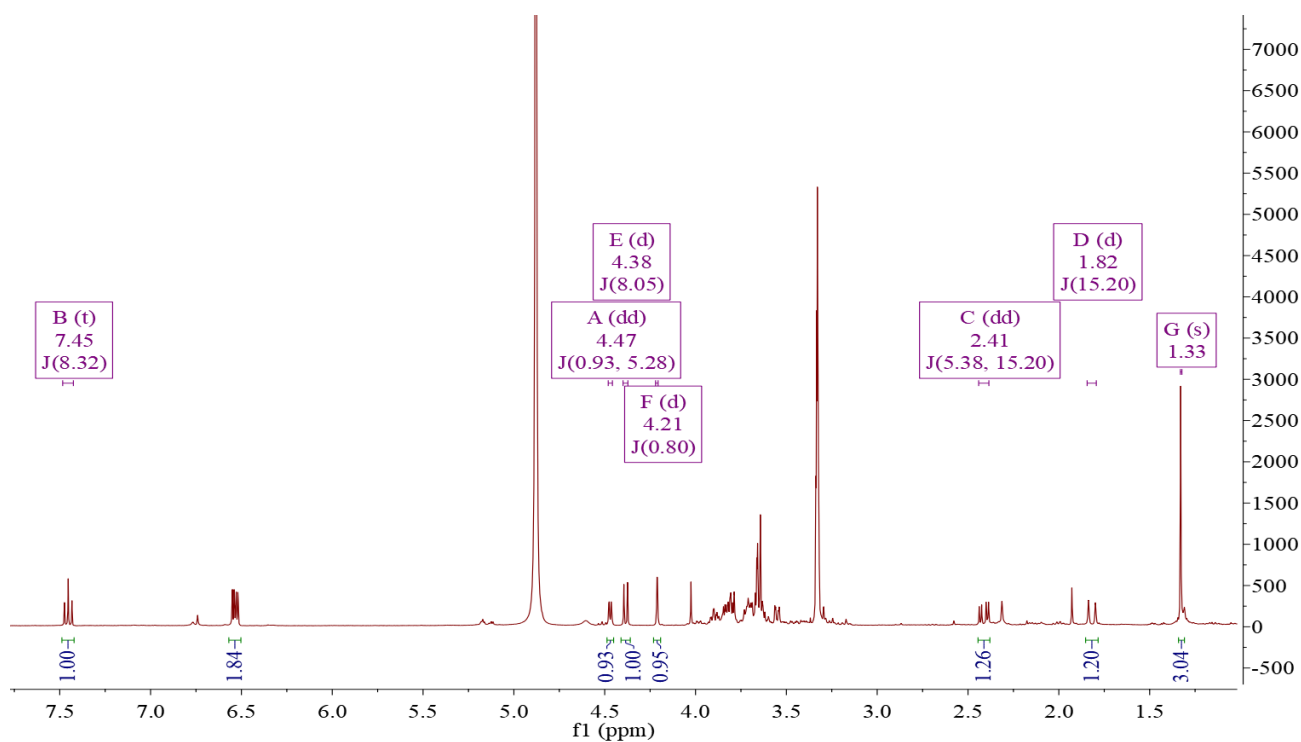

**Figure S42** The <sup>1</sup>H NMR (400MHz) spectrum of compound **6** in CD<sub>3</sub>OD.



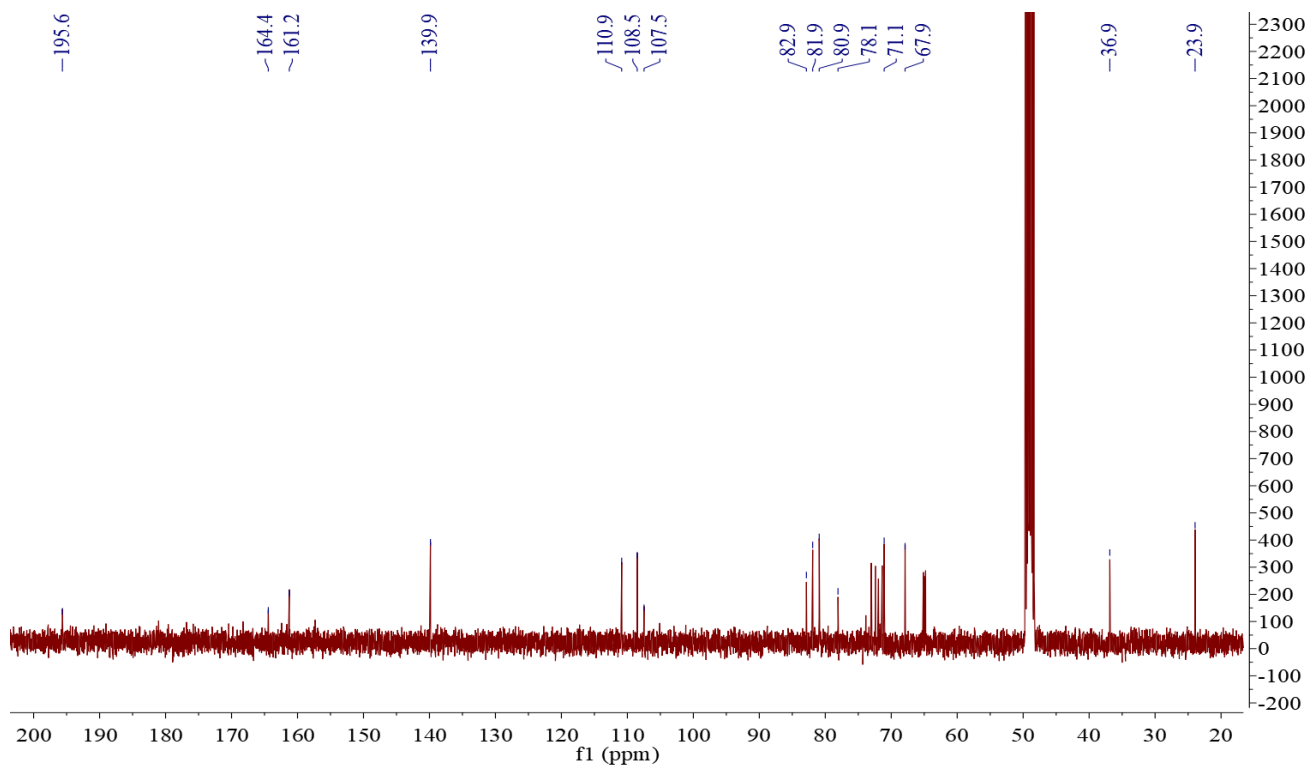

**Figure S43.** The <sup>13</sup>C NMR (100MHz) spectrum of compound **6** in CD<sub>3</sub>OD

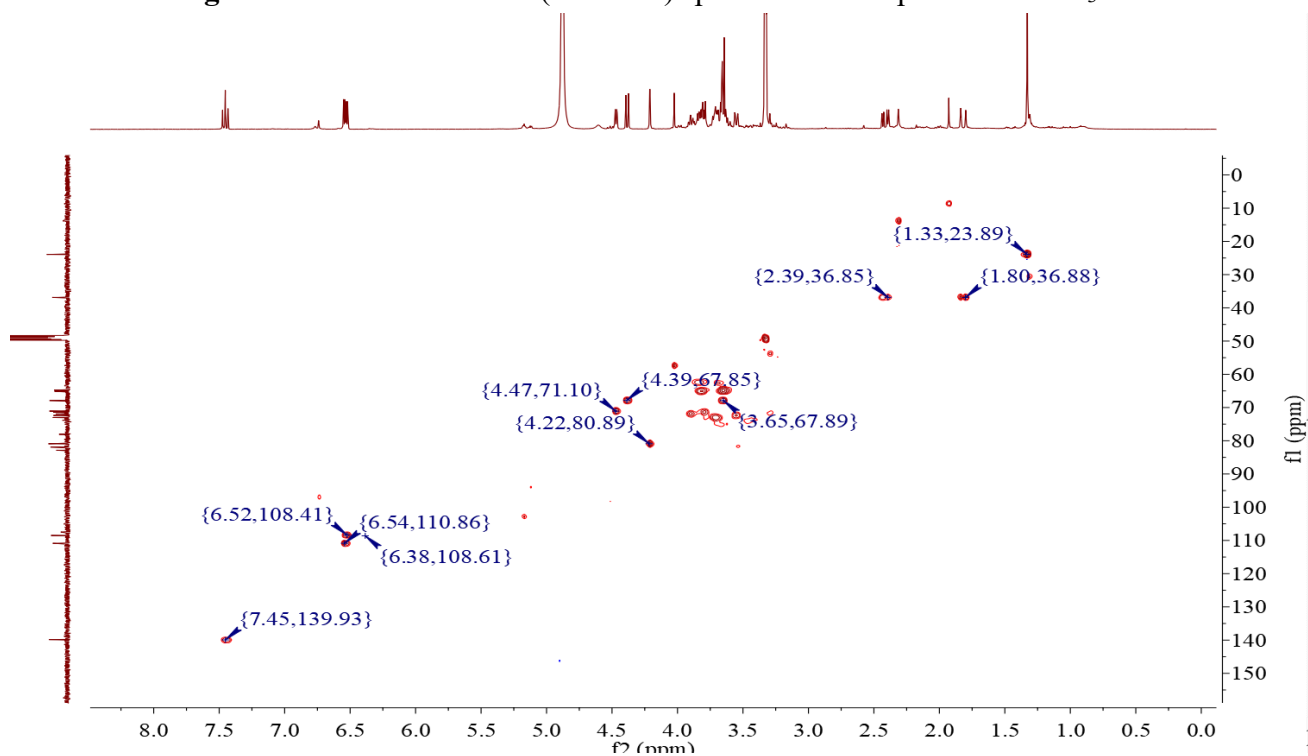

**Figure S44.** The HSQC spectrum of compound **6** in CDCl<sub>3</sub>.

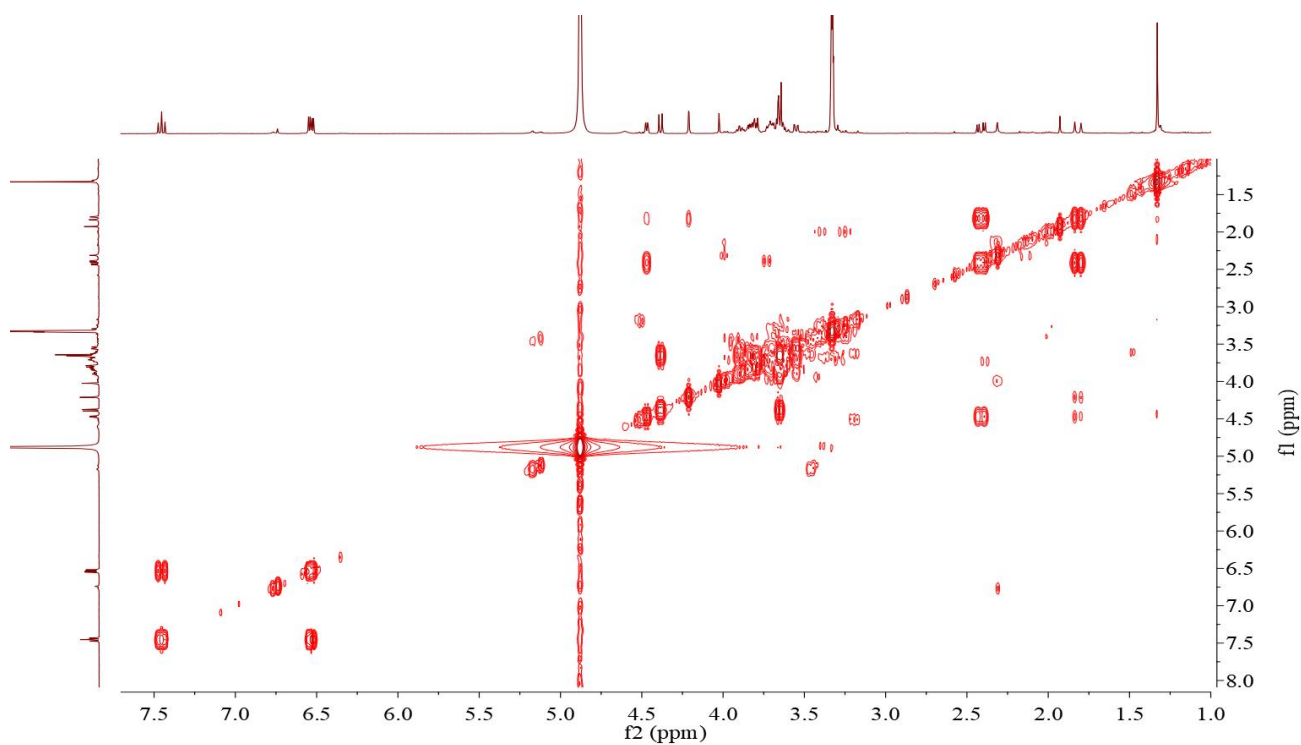

**Figure S45.** The  $^1\text{H}$ - $^1\text{H}$  COSY spectrum of compound **6** in  $\text{CDCl}_3$ .

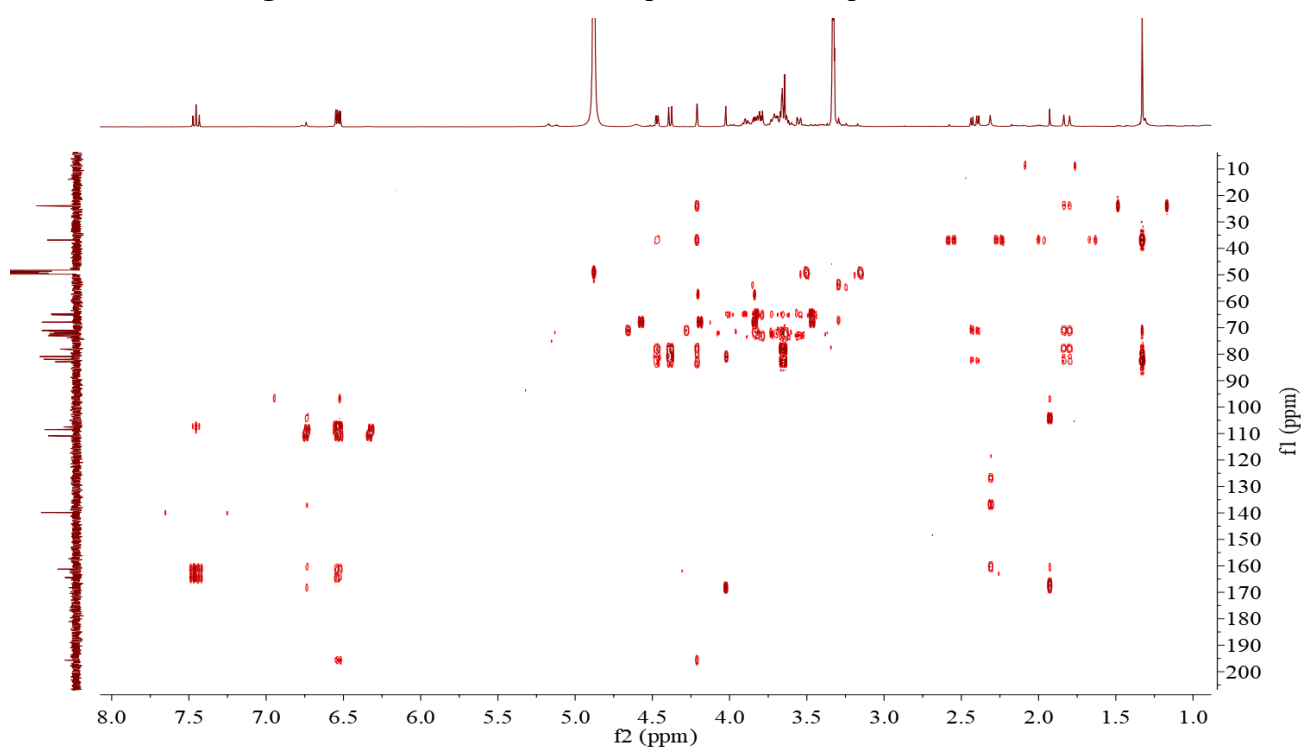

**Figure S46.** The HMBC spectrum of compound **6** in  $\text{CDCl}_3$ .

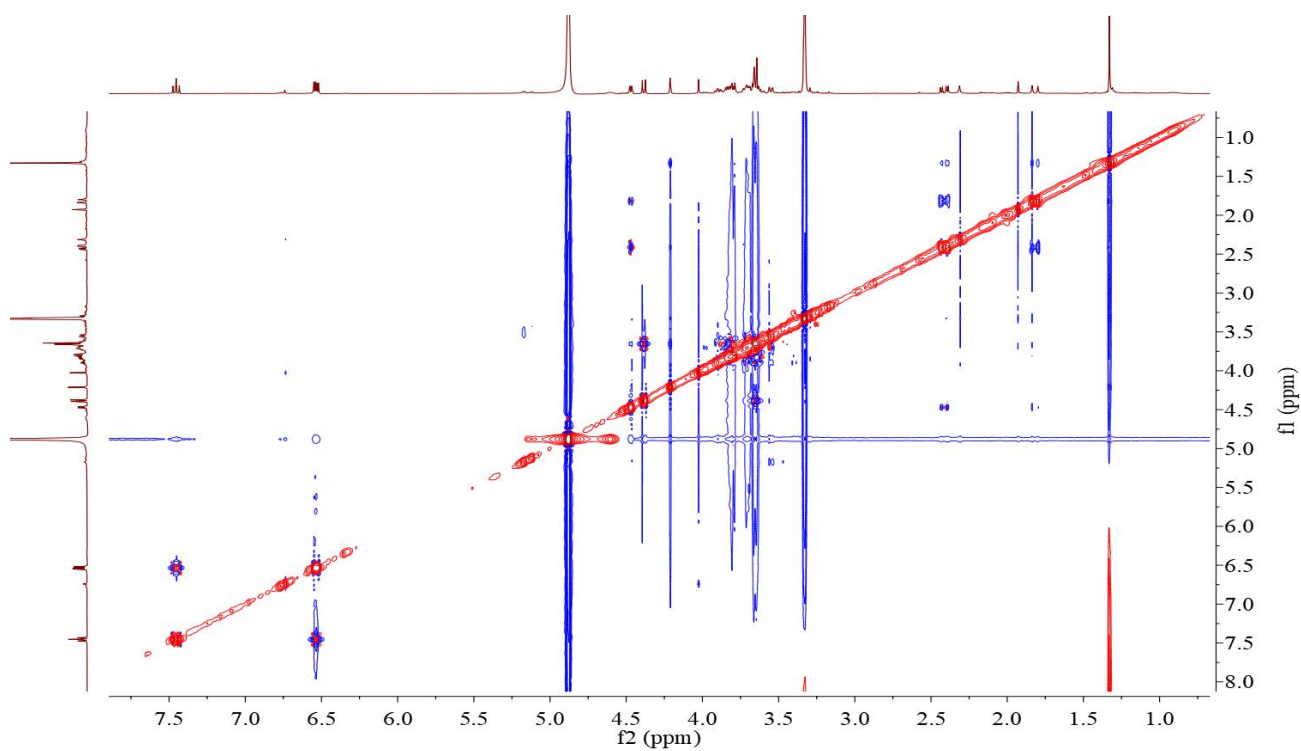

**Figure S47.** The NOESY spectrum of compound **6** in  $\text{CDCl}_3$ .

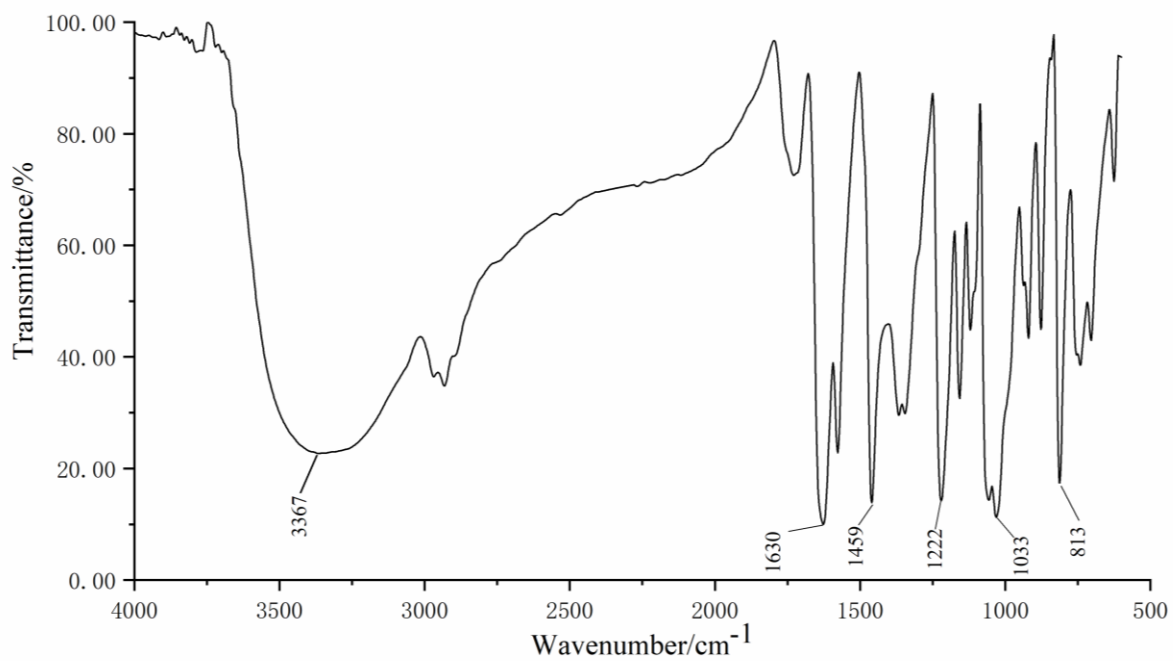

**Figure S48.** IR spectrum of compound **6**.

2110A0634-HRMS #22-26 RT: 0.13-0.16 AV: 5 NL: 3.51E6  
T: FTMS - c ESI Full ms [100.00-1000.00]

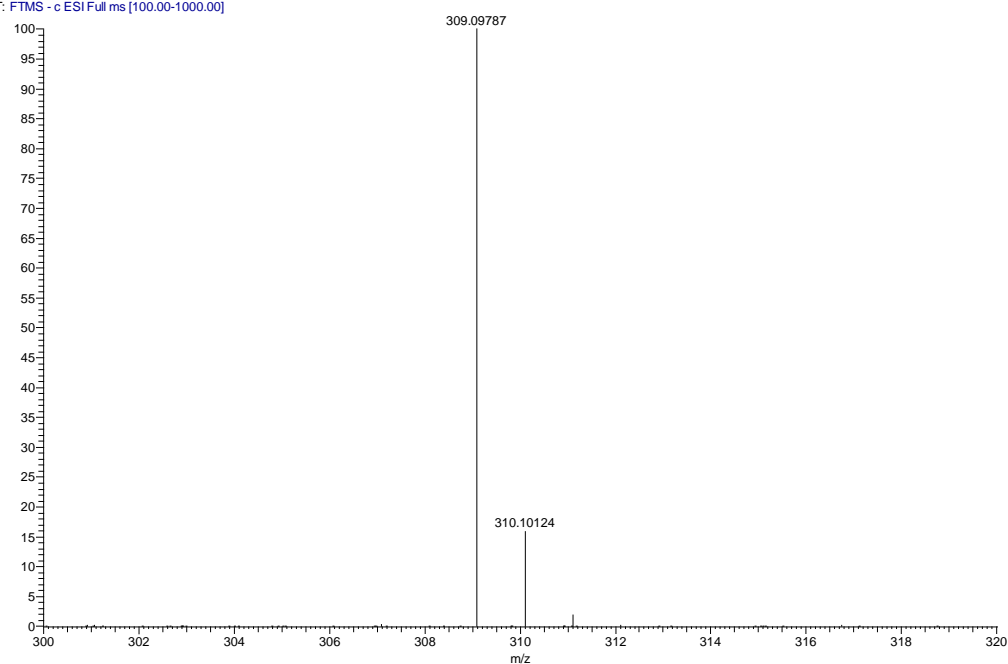

SPECTRUM - simulation :

| m/z       | Theo. Mass | Delta (ppm) | RDB equiv. | Composition |
|-----------|------------|-------------|------------|-------------|
| 309.09787 | 309.09798  | -0.34       | 7.5        | C15 H17 O7  |

**Figure S49.** The HRESIMS spectrum of compound **7** in  $CD_3OD$ .

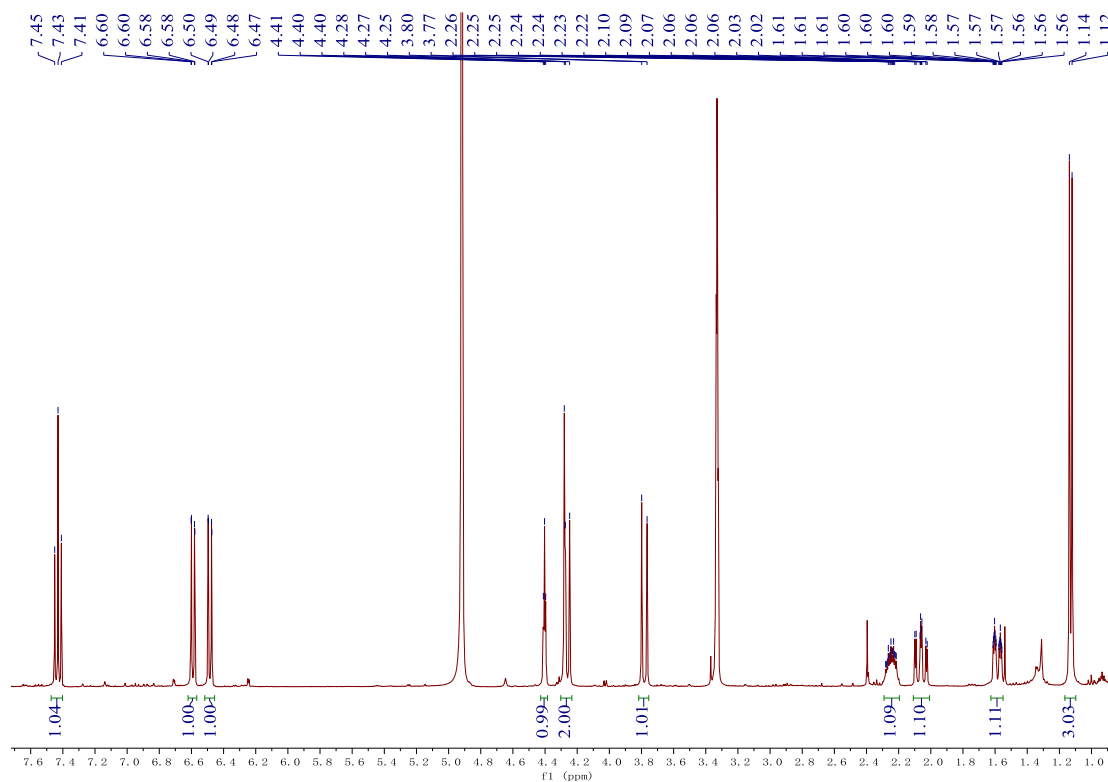

**Figure S50.** The  $^1H$  NMR (400MHz) spectrum of compound **7** in  $CD_3OD$ .

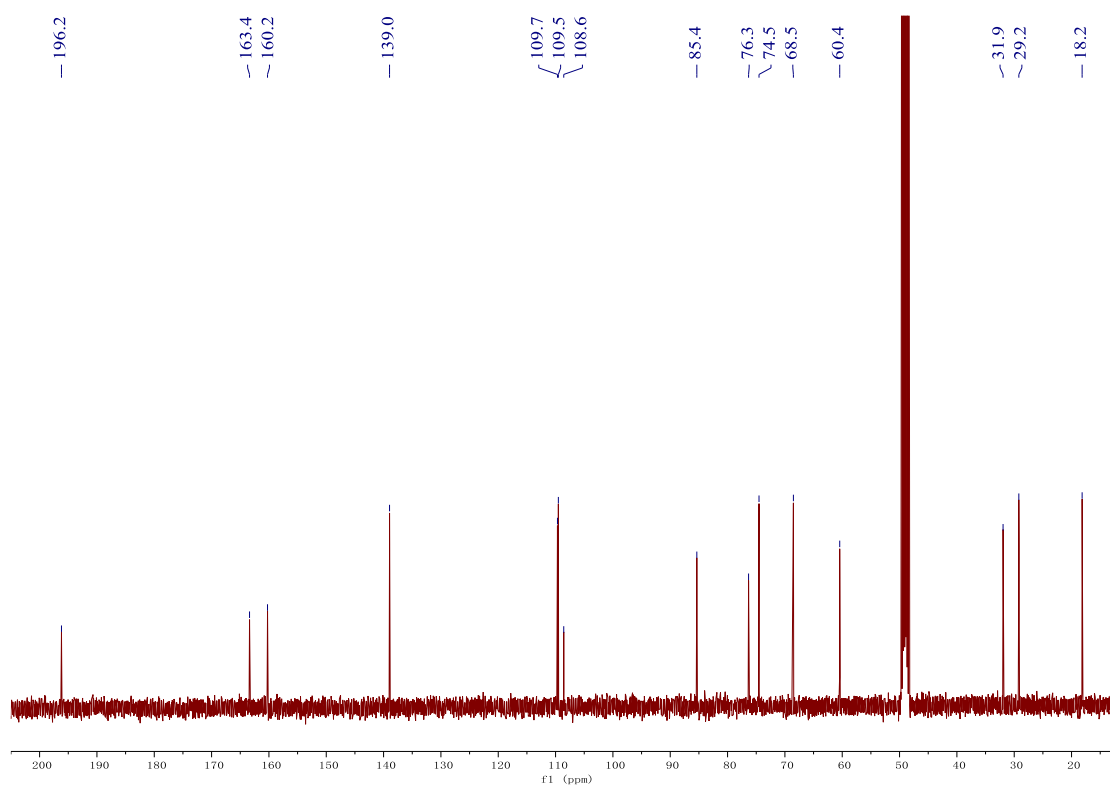

**Figure S51.** The  $^{13}\text{C}$  NMR (100MHz) spectrum of compound **7** in  $\text{CD}_3\text{OD}$ .

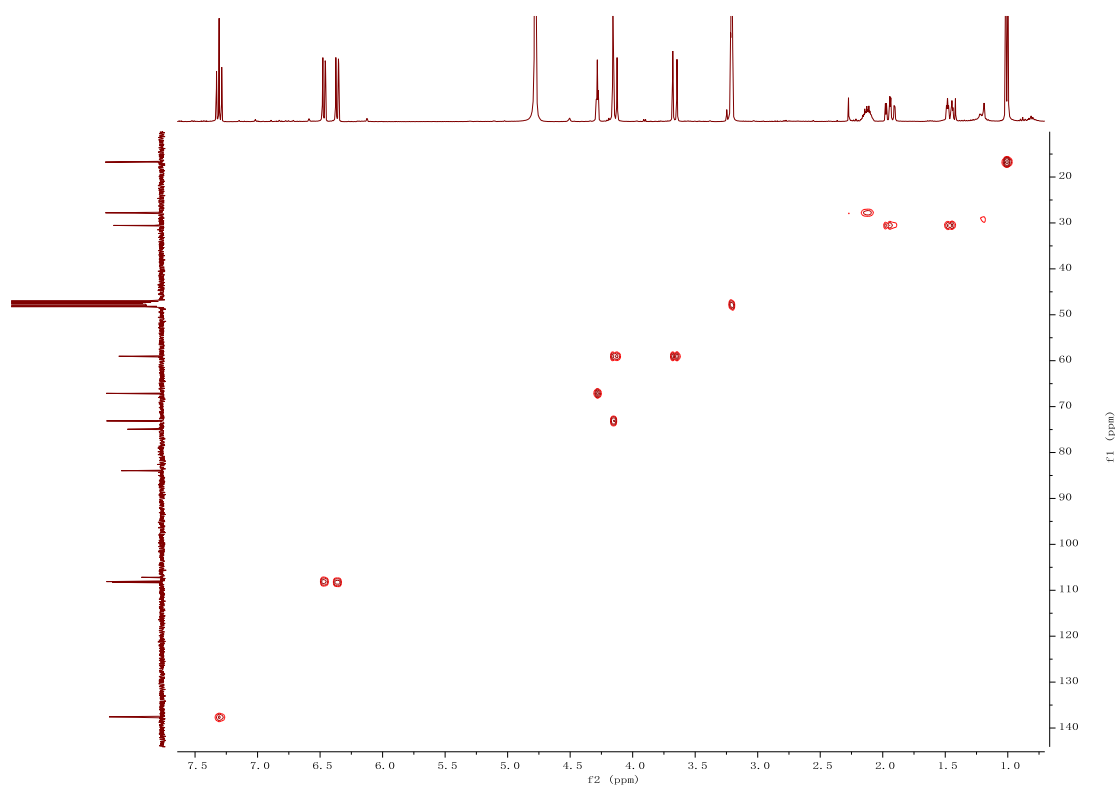

**Figure S52.** The HSQC spectrum of compound **7** in  $\text{CD}_3\text{OD}$ .

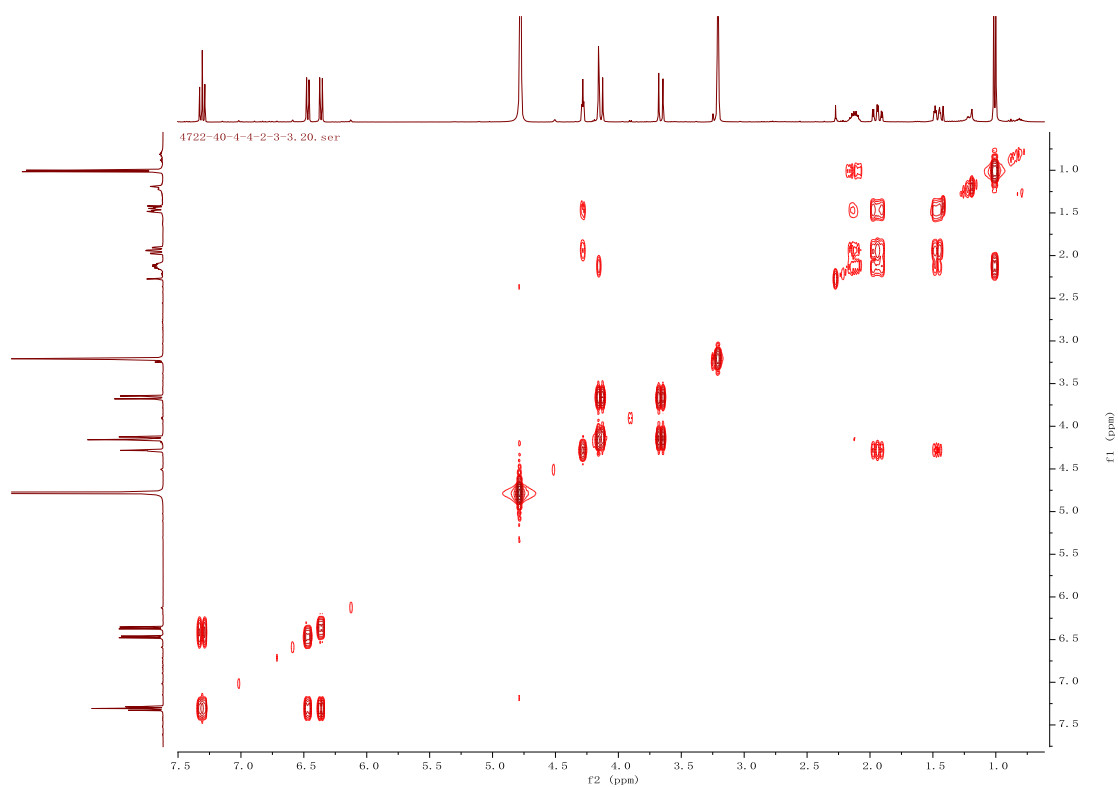

**Figure S53.** The  $^1\text{H}$ - $^1\text{H}$  COSY spectrum of compound **7** in  $\text{CD}_3\text{OD}$ .

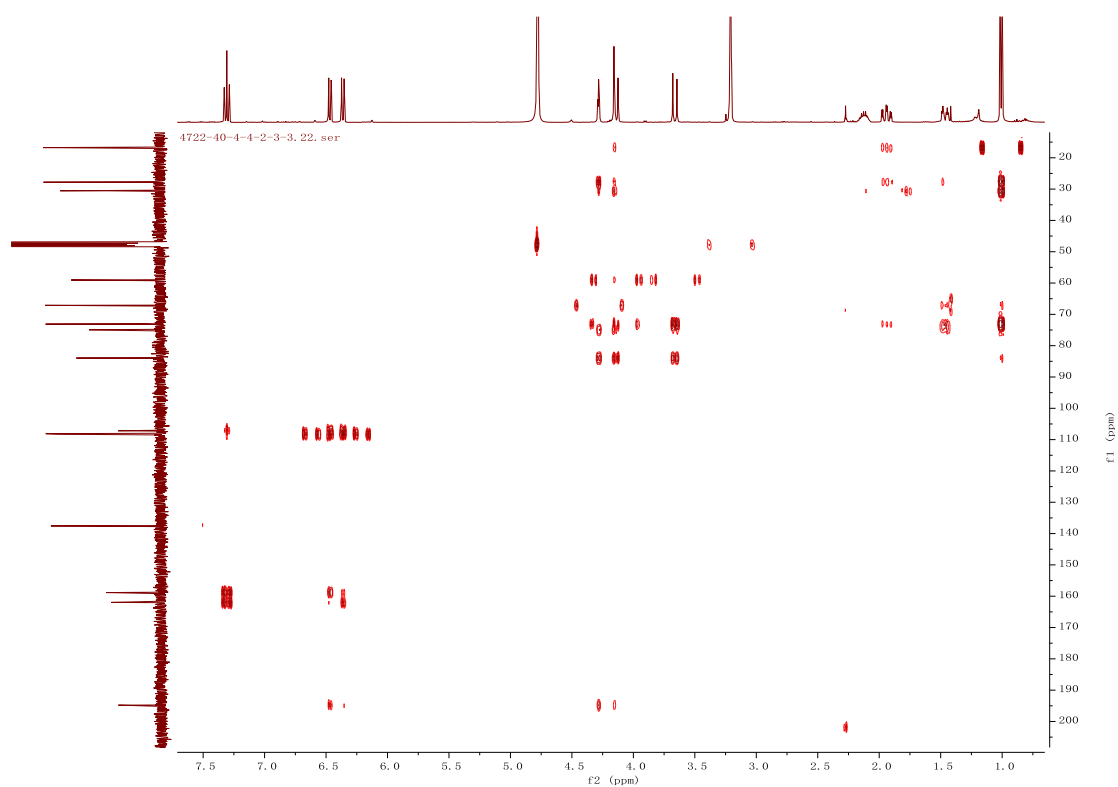

**Figure S54.** The HMBC spectrum of compound **7** in  $\text{CD}_3\text{OD}$ .

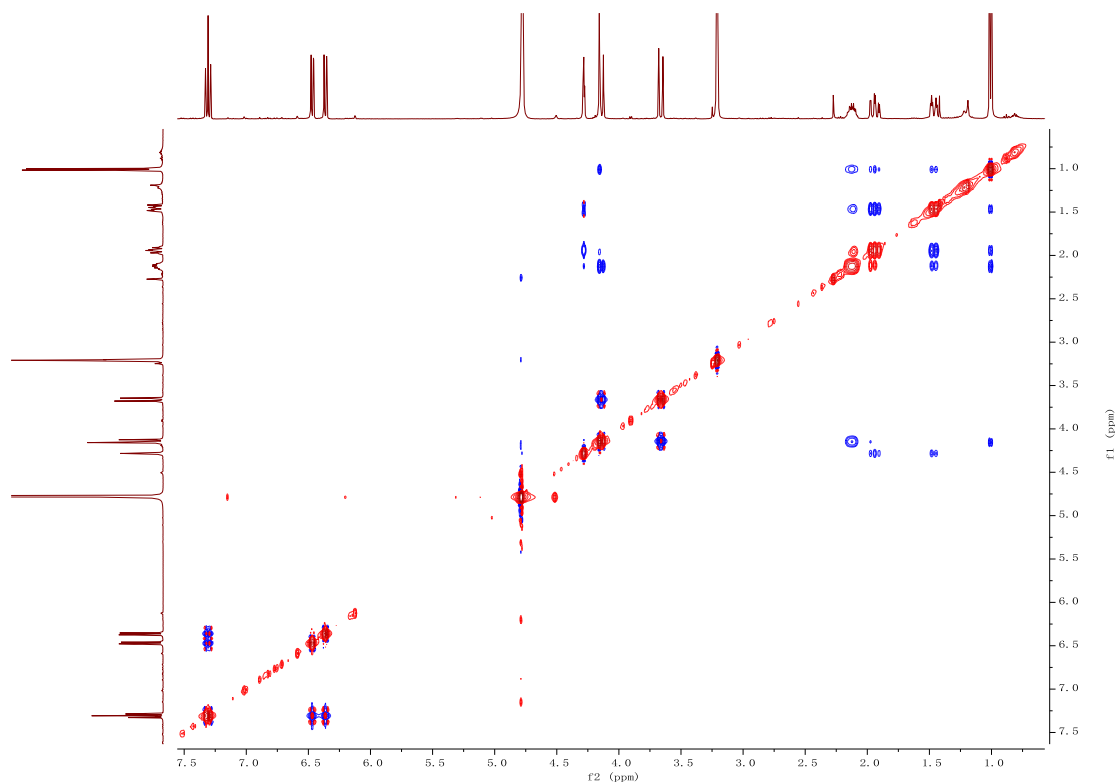

**Figure S55.** The NOESY spectrum of compound **7** in CD<sub>3</sub>OD.

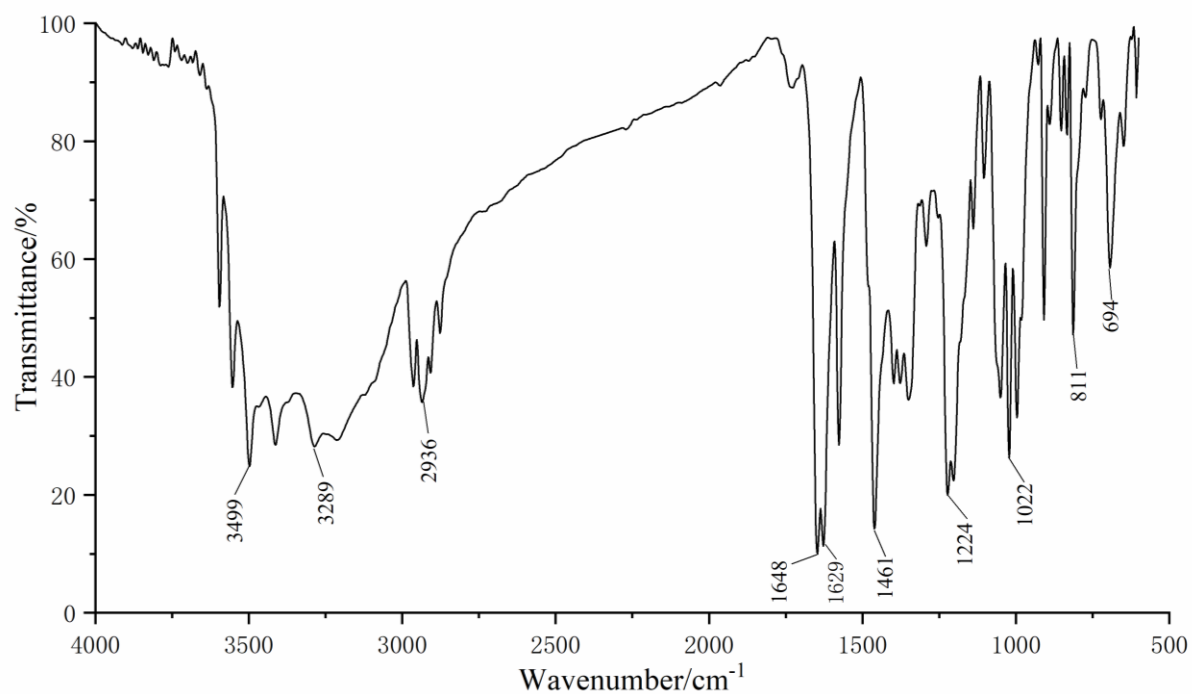

**Figure S56.** IR spectrum of compound **7**.

## Experimental section:

Merck molecular force field (MMFF) and DFT/TD-DFT calculations were carried out with the Spartan'14 software package (Wavefunction Inc., Irvine, CA, USA) and the Gaussian 09 program, respectively. MMFF conformational search generated low-energy conformers within a 10 kcal·mol<sup>-1</sup> energy window and optimized using PM6 semi-empirical optimizations. And then each conformer was optimized with HF/6-31G(d) method in Gaussian09. Further optimization was performed at the b3lyp/6-311g\*\* level. The frequency was calculated at the same level to confirm each optimized conformer with true minimum and to estimate their relative thermal free energies ( $\Delta G$ ) at 298.15 K. The optimized conformers were continually used for the ECD calculations in methanol, which were carried out with Gaussian09 (b3lyp/6-311g\*\*). Solvent effects were taken into account by using the polarizable continuum model (PCM). The ECD data was generated by the program SpecDis using a Gaussian band shape with 0.30 eV exponential half-width from dipole-length dipolar and rotational strengths and the final ECD spectrum was drawn by Origin 2018. All calculations were performed by Tianhe-2 of the National Super Computer Center in Guangzhou.

**Table S1.** Energy of all conformers of diaporthone A (**1**).

| compound | conformer  | E (kcal/mol) | rel.E(kcal/mol) | Boltzmann dist (%) |
|----------|------------|--------------|-----------------|--------------------|
| <b>1</b> | <b>1-a</b> | -648144.4421 | 0               | 59.38%             |
|          | <b>1-b</b> | -648143.991  | 0.451097732     | 27.72%             |
|          | <b>1-c</b> | -648143.5385 | 0.903563435     | 12.90%             |

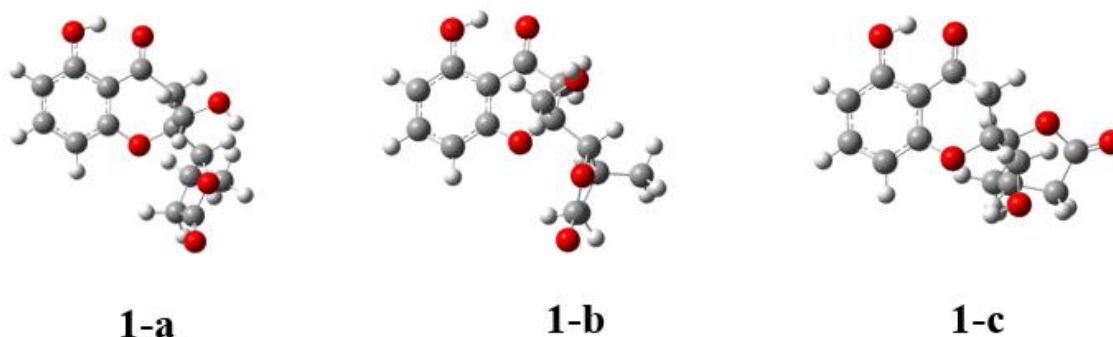

**Figure S57.** B3LYP/6-311g\*\* optimized low-energy conformers of diaporthone A (**1**).

**Table S2.** Cartesian coordinates of the low-energy reoptimized conformers of **1** calculated at b3lyp/6-311g\*\* level of theory in PCM for methanol.

| <b>1-a</b> |            |             |             |
|------------|------------|-------------|-------------|
| Atom       | X axis (Å) | Y axis (Å)  | Z axis (Å)  |
| C          | 1.22981500 | 0.95812100  | 0.07502500  |
| C          | 2.18791400 | -0.05660900 | -0.15790000 |
| C          | 3.56604000 | 0.29718200  | -0.20479100 |
| C          | 3.95182500 | 1.62791700  | -0.04271600 |



| C          | 2.97716700  | 2.59786000  | 0.16600600  |
|------------|-------------|-------------|-------------|
| C          | 1.61963400  | 2.28295000  | 0.23040800  |
| O          | -0.10211400 | 0.69134500  | 0.13441300  |
| C          | -0.54844000 | -0.67279900 | 0.34577800  |
| C          | 0.27393000  | -1.67296100 | -0.47246300 |
| C          | 1.76320700  | -1.42189700 | -0.40057900 |
| O          | 2.56169200  | -2.34648600 | -0.59585900 |
| O          | 4.50775300  | -0.63475500 | -0.41652100 |
| C          | -2.01965200 | -0.71655200 | -0.10543100 |
| C          | -0.42617400 | -0.95595100 | 1.86363200  |
| C          | -2.33436300 | -0.05952900 | -1.47575300 |
| C          | -2.87678500 | 1.31896800  | -1.06839300 |
| C          | -3.32351700 | 1.15584100  | 0.36750800  |
| O          | -2.84634400 | -0.02006600 | 0.86270100  |
| O          | -0.97698000 | -2.21961900 | 2.21127800  |
| C          | -3.35298300 | -0.88055900 | -2.27431600 |
| O          | -3.99136600 | 1.89172900  | 1.04268300  |
| H          | -2.33945100 | -1.75859000 | -0.08044000 |
| H          | 5.00360600  | 1.88019000  | -0.08334600 |
| H          | 3.28145600  | 3.63069500  | 0.29209400  |
| H          | 0.86916700  | 3.04121100  | 0.41010700  |
| H          | 0.06774400  | -2.68368900 | -0.11737500 |
| H          | 0.00197000  | -1.63682800 | -1.53317000 |
| H          | 4.03951700  | -1.49813200 | -0.52156700 |
| H          | 0.62878700  | -0.98098700 | 2.14358100  |
| H          | -0.90356800 | -0.14002400 | 2.40856800  |
| H          | -1.42095100 | 0.04918500  | -2.06034600 |
| H          | -2.10434300 | 2.09075100  | -1.08908600 |
| H          | -3.71227800 | 1.66340600  | -1.67904600 |
| H          | -1.92130000 | -2.10349400 | 2.36256400  |
| H          | -3.60099300 | -0.37506800 | -3.21067700 |
| H          | -4.28031400 | -1.01842200 | -1.70979400 |
| H          | -2.95589100 | -1.86929500 | -2.51772000 |
| <b>1-b</b> |             |             |             |
| Atom       | X axis (Å)  | Y axis (Å)  | Z axis (Å)  |
| C          | 1.20551300  | 0.96442100  | 0.07673700  |
| C          | 2.16409500  | -0.04489000 | -0.17522900 |
| C          | 3.53927800  | 0.31495800  | -0.24412500 |

|   |             |             |             |
|---|-------------|-------------|-------------|
| C | 3.92163900  | 1.64719300  | -0.08551000 |
| C | 2.94623100  | 2.61212100  | 0.14181200  |
| C | 1.59131400  | 2.29064100  | 0.22860700  |
| O | -0.12393400 | 0.69003700  | 0.16173700  |
| C | -0.55756400 | -0.67642600 | 0.37752000  |
| C | 0.25110300  | -1.66518700 | -0.47011200 |
| C | 1.74032000  | -1.41141800 | -0.41493900 |
| O | 2.53956700  | -2.33249900 | -0.62329500 |
| O | 4.48153100  | -0.61264100 | -0.47321400 |
| C | -2.04432800 | -0.71179900 | -0.02515900 |
| C | -0.39189000 | -0.97208500 | 1.88017000  |
| C | -2.38415800 | -0.15489600 | -1.43497700 |
| C | -2.88854300 | 1.26295000  | -1.12752600 |
| C | -3.27531400 | 1.23301900  | 0.33383700  |
| O | -2.81426200 | 0.08975700  | 0.90682300  |
| O | -0.86869400 | -2.29390900 | 2.10991000  |
| C | -3.43526400 | -1.01723800 | -2.14246400 |
| O | -3.89264800 | 2.04549500  | 0.96998100  |
| H | -2.38900200 | -1.73745900 | 0.10309200  |
| H | 4.97143900  | 1.90447800  | -0.14276000 |
| H | 3.24790900  | 3.64598200  | 0.26568800  |
| H | 0.84055400  | 3.04471900  | 0.42400200  |
| H | 0.05374200  | -2.68217600 | -0.13162200 |
| H | -0.03440000 | -1.60680500 | -1.52565300 |
| H | 4.01495400  | -1.47782800 | -0.57089800 |
| H | 0.66498100  | -0.87856500 | 2.15581500  |
| H | -0.96593600 | -0.23218900 | 2.44283200  |
| H | -1.48639900 | -0.10887500 | -2.05119600 |
| H | -2.10781200 | 2.01706900  | -1.24829500 |
| H | -3.74448200 | 1.56852700  | -1.73078200 |
| H | -0.82447000 | -2.46880400 | 3.05540300  |
| H | -3.69756300 | -0.58368500 | -3.11059000 |
| H | -4.35072800 | -1.09327100 | -1.54765900 |
| H | -3.05987400 | -2.02922400 | -2.31475500 |

---



---

| 1-c  |            |            |            |
|------|------------|------------|------------|
| Atom | X axis (Å) | Y axis (Å) | Z axis (Å) |

---

|   |             |             |             |
|---|-------------|-------------|-------------|
| C | -1.53938200 | -0.84720400 | 0.53670600  |
| C | -2.11198400 | 0.36795700  | 0.09371000  |
| C | -3.39749400 | 0.33993600  | -0.51621400 |
| C | -4.08042600 | -0.86935200 | -0.65076700 |
| C | -3.49148000 | -2.03878000 | -0.18296000 |
| C | -2.22693300 | -2.04739800 | 0.40737000  |
| O | -0.30929100 | -0.89434500 | 1.11881700  |
| C | 0.60351000  | 0.22441700  | 0.96466500  |
| C | -0.13777500 | 1.55993400  | 1.11057100  |
| C | -1.42185900 | 1.62464900  | 0.31617200  |
| O | -1.87035800 | 2.71184400  | -0.06628300 |
| O | -3.97416800 | 1.46824500  | -0.95668700 |
| C | 1.23356500  | 0.11455300  | -0.45440600 |
| C | 1.59491200  | 0.07173400  | 2.12959500  |
| C | 1.95984600  | -1.20251400 | -0.84138500 |
| C | 3.44110200  | -0.82851200 | -0.69463800 |
| C | 3.47477200  | 0.68137400  | -0.75818700 |
| O | 2.21104600  | 1.17436700  | -0.60172700 |
| O | 2.22203200  | -1.19812800 | 2.19522200  |
| C | 1.60139100  | -1.63363600 | -2.26863800 |
| O | 4.41279500  | 1.41741400  | -0.90514700 |
| H | 0.44951900  | 0.32996500  | -1.18310400 |
| H | -5.05840200 | -0.87318800 | -1.11452800 |
| H | -4.02603600 | -2.97590400 | -0.28853000 |
| H | -1.76922100 | -2.96403700 | 0.75487700  |
| H | -0.41278600 | 1.71782400  | 2.16008700  |
| H | 0.50838300  | 2.38623500  | 0.81324900  |
| H | -3.35009000 | 2.20746300  | -0.75869400 |
| H | 2.38607500  | 0.81584100  | 2.03018200  |
| H | 1.04968200  | 0.28134600  | 3.05668700  |
| H | 1.68968000  | -1.99385300 | -0.14708900 |
| H | 3.83520200  | -1.12659000 | 0.27992000  |
| H | 4.08690900  | -1.24862200 | -1.46617400 |
| H | 1.52918200  | -1.85430000 | 2.33585000  |
| H | 2.16012700  | -2.53028800 | -2.54802400 |
| H | 1.83907800  | -0.84927700 | -2.99423800 |
| H | 0.53566200  | -1.86073300 | -2.35360600 |

**Table S3.** Energy of all conformers of diaporthone C (**3**).

| compound | conformer  | E (kcal/mol) | rel.E(kcal/mol) | Boltzmann dist (%) |
|----------|------------|--------------|-----------------|--------------------|
| <b>3</b> | <b>3-a</b> | -695330.4661 | 0               | 52.06%             |
|          | <b>3-b</b> | -695330.5150 | -0.048914363    | 47.94%             |

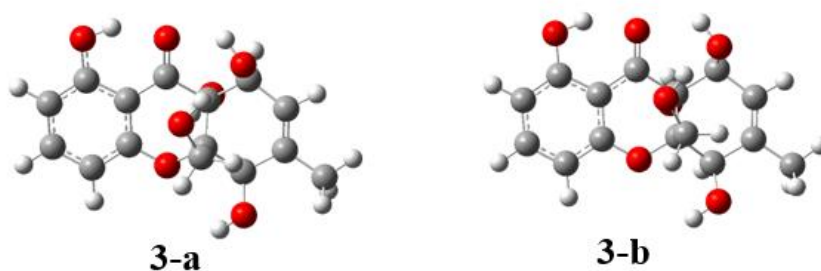**Figure S58.** B3LYP/6-311g\*\* optimized low-energy conformers of diaporthone C (**3**).**Table S4.** Cartesian coordinates of the low-energy reoptimized conformers of **3** calculated at b3lyp/6-311g\*\* level of theory in PCM for methanol.

| <b>3-a</b> |             |             |             |
|------------|-------------|-------------|-------------|
| Atom       | X axis (Å)  | Y axis (Å)  | Z axis (Å)  |
| C          | -1.51403000 | -1.24687700 | -0.11241800 |
| C          | -1.91565900 | 0.11072500  | -0.15131000 |
| C          | -3.30190400 | 0.42238600  | -0.12927800 |
| C          | -4.24829500 | -0.60172800 | -0.10023900 |
| C          | -3.81699300 | -1.92409900 | -0.08694200 |
| C          | -2.46359200 | -2.26219200 | -0.08762700 |
| O          | -0.20897700 | -1.61769600 | -0.10863500 |
| C          | 0.81721500  | -0.62588100 | 0.18532000  |
| C          | 0.50139300  | 0.67338600  | -0.56812500 |
| C          | -0.92025100 | 1.15461100  | -0.25091400 |
| C          | 2.12379600  | -1.21228200 | -0.38161900 |
| C          | 3.23505200  | -0.17789100 | -0.37528700 |
| C          | 2.96933000  | 1.13303500  | -0.36210000 |
| C          | 1.59630400  | 1.74045100  | -0.33945200 |
| O          | -1.18222700 | 2.36505500  | -0.23100200 |
| O          | 1.42433800  | 2.46638400  | 0.89511000  |
| C          | 4.63973200  | -0.71025100 | -0.44173300 |

|   |             |             |             |
|---|-------------|-------------|-------------|
| O | 2.53925900  | -2.35134600 | 0.37127800  |
| C | 0.93209600  | -0.46446300 | 1.72279700  |
| O | 0.03863000  | 0.48488700  | 2.28772000  |
| O | -3.72619100 | 1.69827600  | -0.14668800 |
| O | 0.47619900  | 0.32407500  | -1.96096600 |
| H | -5.30027000 | -0.34747100 | -0.08732100 |
| H | -4.55487400 | -2.71793100 | -0.06237600 |
| H | -2.13673800 | -3.29322600 | -0.05774500 |
| H | 1.93157800  | -1.50628900 | -1.41946100 |
| H | 3.78696600  | 1.84704100  | -0.38228700 |
| H | 1.51333300  | 2.45936500  | -1.16311600 |
| H | 0.69321700  | 3.08198700  | 0.74147000  |
| H | 5.36436100  | 0.10405700  | -0.48171500 |
| H | 4.77339900  | -1.33948200 | -1.32838100 |
| H | 4.85779500  | -1.33979100 | 0.42386300  |
| H | 1.90234500  | -3.05451000 | 0.20034600  |
| H | 1.96588700  | -0.21957600 | 1.97678000  |
| H | 0.70080400  | -1.43395900 | 2.16202400  |
| H | 0.44813000  | 1.35056700  | 2.12766100  |
| H | -2.93141200 | 2.27635600  | -0.15835800 |
| H | 0.29206900  | 1.12221100  | -2.47235300 |

### 3-b

| Atom | X axis (Å)  | Y axis (Å)  | Z axis (Å)  |
|------|-------------|-------------|-------------|
| C    | -1.51648800 | -1.24609200 | -0.15051700 |
| C    | -1.91214600 | 0.11336000  | -0.17410700 |
| C    | -3.29563600 | 0.42768800  | -0.10324600 |
| C    | -4.24177600 | -0.59691000 | -0.03966500 |
| C    | -3.81457900 | -1.91919500 | -0.03858900 |
| C    | -2.46100500 | -2.26022400 | -0.08763000 |
| O    | -0.20273300 | -1.61108200 | -0.23225400 |
| C    | 0.81484800  | -0.63278200 | 0.15176200  |
| C    | 0.51169100  | 0.67681900  | -0.59274700 |
| C    | -0.91315000 | 1.15924200  | -0.27841200 |
| C    | 2.14194100  | -1.21053500 | -0.37124300 |
| C    | 3.24745200  | -0.17196700 | -0.31732000 |
| C    | 2.97442200  | 1.13725500  | -0.32183600 |
| C    | 1.60144000  | 1.74311800  | -0.35415600 |
| O    | -1.18005100 | 2.36648600  | -0.24770800 |

|   |             |             |             |
|---|-------------|-------------|-------------|
| O | 1.39837700  | 2.48890900  | 0.86175000  |
| C | 4.65610200  | -0.69812000 | -0.32710500 |
| O | 2.53261200  | -2.35546700 | 0.38439200  |
| C | 0.86326300  | -0.50575500 | 1.69750400  |
| O | 0.02701500  | 0.50628300  | 2.23998300  |
| O | -3.71912000 | 1.70228200  | -0.10290000 |
| O | 0.52988800  | 0.46419800  | -2.01347400 |
| H | -5.29206700 | -0.34029100 | 0.01064700  |
| H | -4.55277400 | -2.71120300 | 0.01387300  |
| H | -2.13438800 | -3.29151000 | -0.07165600 |
| H | 1.99734900  | -1.49948100 | -1.41935200 |
| H | 3.78919100  | 1.85482300  | -0.31191700 |
| H | 1.53253600  | 2.43476100  | -1.19990900 |
| H | 0.65150800  | 3.08063100  | 0.68810300  |
| H | 5.37735300  | 0.11999600  | -0.34073200 |
| H | 4.82776000  | -1.32860600 | -1.20629700 |
| H | 4.84368400  | -1.32425200 | 0.54809300  |
| H | 1.90356500  | -3.05884700 | 0.18689900  |
| H | 1.90114400  | -0.35382300 | 2.00301000  |
| H | 0.53309500  | -1.45814800 | 2.11130300  |
| H | 0.48457600  | 1.34768700  | 2.07241400  |
| H | -2.92425700 | 2.27993400  | -0.14022200 |
| H | 0.03554700  | -0.33994300 | -2.21873600 |

**Table S5.** Energy of all conformers of diaporthone D (**4**).

| compound | conformer  | E <sub>tot</sub> (a.u.) | G <sub>298.15</sub> (a.u.) | P (%)  |
|----------|------------|-------------------------|----------------------------|--------|
| <b>4</b> | <b>4-a</b> | -1033.827651            | -1033.556385               | 18.26% |
|          | <b>4-b</b> | -1033.825971            | -1033.556269               | 16.15% |
|          | <b>4-c</b> | -1033.827221            | -1033.556004               | 12.19% |
|          | <b>4-d</b> | -1033.827219            | -1033.555981               | 11.91% |
|          | <b>4-e</b> | -1033.826509            | -1033.555857               | 10.44% |
|          | <b>4-f</b> | -1033.825952            | -1033.555652               | 8.40%  |
|          | <b>4-g</b> | -1033.826526            | -1033.555202               | 5.22%  |
|          | <b>4-h</b> | -1033.825788            | -1033.555028               | 4.34%  |
|          | <b>4-i</b> | -1033.82362             | -1033.554905               | 3.81%  |
|          | <b>4-j</b> | -1033.824412            | -1033.554629               | 2.84%  |
|          | <b>4-k</b> | -1033.824707            | -1033.554528               | 2.55%  |
|          | <b>4-l</b> | -1033.824384            | -1033.553745               | 1.12%  |

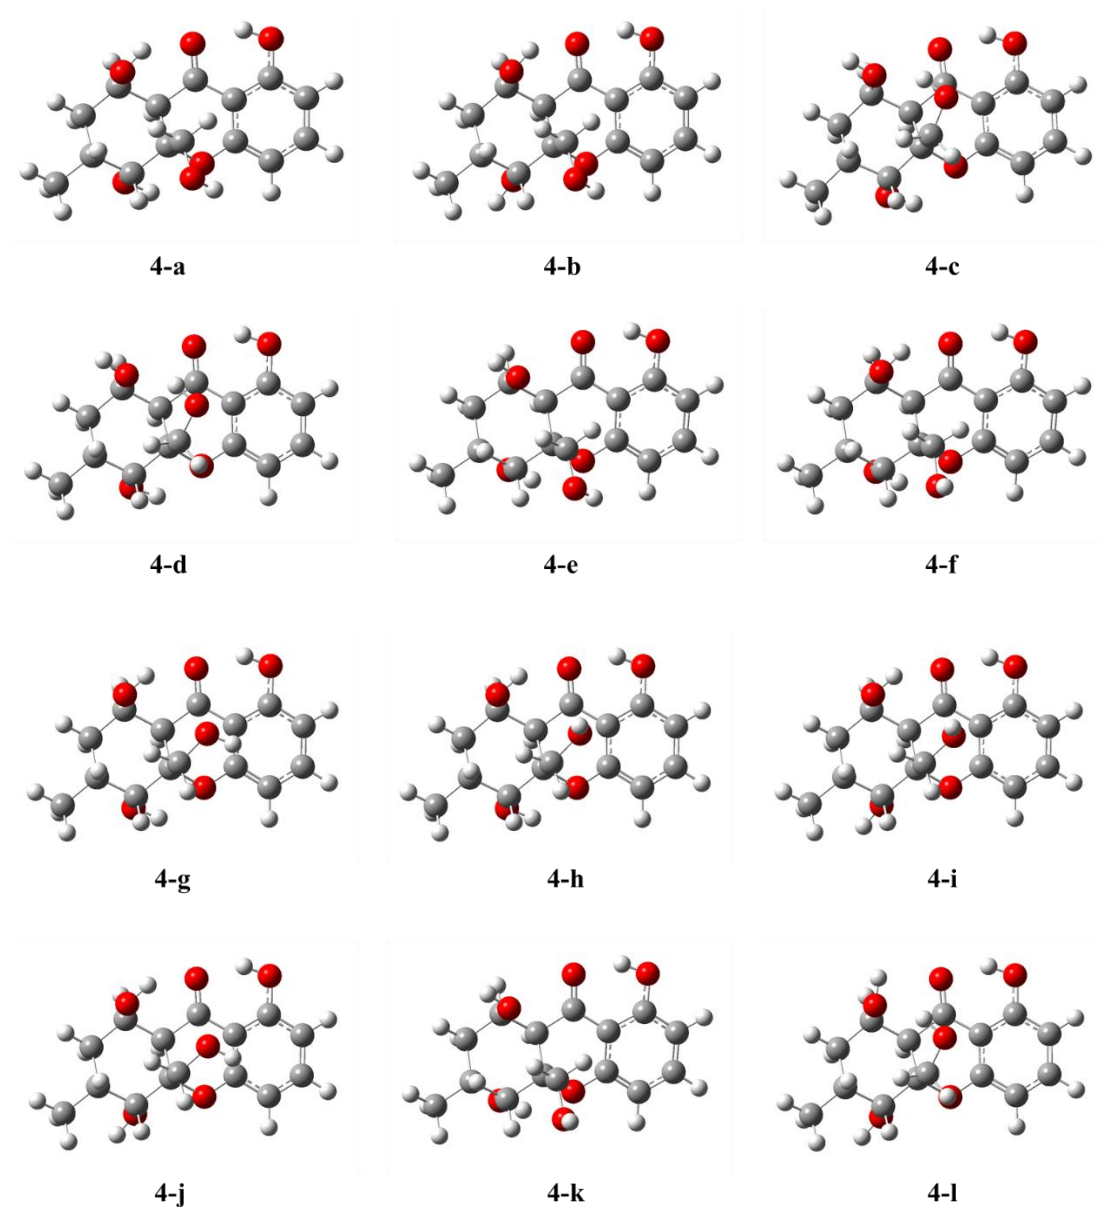

**Figure S59.** B3LYP/6-311g\*\* optimized low-energy conformers of diaporphone D (**4**).

**Table S6.** Cartesian coordinates of the low-energy reoptimized conformers of **4** calculated at b3lyp/6-311g\*\* level of theory in PCM for methanol.

| <b>4-a</b> |            |            |            |
|------------|------------|------------|------------|
| Atom       | X axis (Å) | Y axis (Å) | Z axis (Å) |
| C          | 1.565362   | -1.088861  | -0.24815   |
| C          | 1.925603   | 0.271627   | -0.177181  |
| C          | 3.295477   | 0.613521   | -0.138031  |
| C          | 4.26451    | -0.379393  | -0.214468  |
| C          | 3.870553   | -1.702678  | -0.310813  |
| C          | 2.531858   | -2.074459  | -0.323134  |
| O          | 0.270392   | -1.48854   | -0.240546  |
| C          | -0.732654  | -0.542549  | 0.206898   |

|   |           |           |           |
|---|-----------|-----------|-----------|
| C | -0.492206 | 0.792112  | -0.500567 |
| C | 0.893955  | 1.294528  | -0.206187 |
| C | -2.073818 | -1.128962 | -0.259498 |
| C | -3.213554 | -0.143902 | 0.009964  |
| C | -2.949505 | 1.206568  | -0.662222 |
| C | -1.605334 | 1.824354  | -0.304013 |
| O | 1.133243  | 2.490721  | -0.046248 |
| O | -1.661113 | 2.317054  | 1.02886   |
| C | -4.558082 | -0.721057 | -0.420411 |
| O | -2.031674 | -1.408622 | -1.648689 |
| C | -0.634777 | -0.471623 | 1.737689  |
| O | -0.821059 | -1.732716 | 2.343931  |
| O | 3.685733  | 1.889992  | -0.043566 |
| H | -0.481179 | 0.551146  | -1.571702 |
| H | 5.309709  | -0.10289  | -0.189242 |
| H | 4.628752  | -2.474025 | -0.364693 |
| H | 2.233809  | -3.112589 | -0.3718   |
| H | -2.253675 | -2.052269 | 0.29943   |
| H | -3.249968 | 0.008327  | 1.091301  |
| H | -2.985464 | 1.076426  | -1.746632 |
| H | -3.737822 | 1.91301   | -0.396064 |
| H | -1.406515 | 2.65664   | -0.985355 |
| H | -0.85963  | 2.827105  | 1.178804  |
| H | -4.588725 | -0.876524 | -1.499851 |
| H | -4.746529 | -1.679607 | 0.06765   |
| H | -5.366361 | -0.038812 | -0.150893 |
| H | -1.287942 | -1.997726 | -1.802415 |
| H | -1.399036 | 0.195688  | 2.124907  |
| H | 0.334783  | -0.046386 | 2.020153  |
| H | -0.153737 | -2.332237 | 1.999124  |
| H | 2.881044  | 2.446242  | 0.008107  |

---

| 4-b  |            |            |            |
|------|------------|------------|------------|
| Atom | X axis (Å) | Y axis (Å) | Z axis (Å) |
| C    | 1.571137   | -1.097387  | -0.245201  |
| C    | 1.934334   | 0.263159   | -0.176852  |
| C    | 3.305137   | 0.604374   | -0.132479  |
| C    | 4.273814   | -0.388333  | -0.20072   |
| C    | 3.87847    | -1.712318  | -0.294749  |
| C    | 2.540743   | -2.083209  | -0.31254   |
| O    | 0.282051   | -1.499524  | -0.245617  |
| C    | -0.728668  | -0.556731  | 0.17728    |
| C    | -0.482874  | 0.787798   | -0.512954  |
| C    | 0.905094   | 1.285403   | -0.213301  |



|   |           |           |           |
|---|-----------|-----------|-----------|
| C | -2.073181 | -1.120847 | -0.290958 |
| C | -3.205512 | -0.135052 | 0.04215   |
| C | -2.947609 | 1.223251  | -0.614777 |
| C | -1.588285 | 1.826034  | -0.290092 |
| O | 1.14495   | 2.482803  | -0.056926 |
| O | -1.608297 | 2.319894  | 1.043629  |
| C | -4.564659 | -0.692561 | -0.368913 |
| O | -1.97045  | -1.350109 | -1.689133 |
| C | -0.647282 | -0.49065  | 1.711711  |
| O | -0.858422 | -1.751606 | 2.310129  |
| O | 3.69483   | 1.881566  | -0.040451 |
| H | -0.474593 | 0.564597  | -1.587591 |
| H | 5.319129  | -0.112729 | -0.171519 |
| H | 4.636464  | -2.484341 | -0.343168 |
| H | 2.242459  | -3.121285 | -0.361379 |
| H | -2.245067 | -2.066887 | 0.229698  |
| H | -3.219623 | -0.008961 | 1.127149  |
| H | -3.014155 | 1.104746  | -1.699209 |
| H | -3.721301 | 1.934467  | -0.320188 |
| H | -1.399772 | 2.657245  | -0.975582 |
| H | -0.798047 | 2.821862  | 1.173326  |
| H | -4.743592 | -1.669677 | 0.085179  |
| H | -5.362726 | -0.020681 | -0.04915  |
| H | -4.642913 | -0.79652  | -1.454212 |
| H | -2.691294 | -1.922828 | -1.955547 |
| H | -1.400097 | 0.187878  | 2.099775  |
| H | 0.328527  | -0.084373 | 1.999945  |
| H | -0.203959 | -2.361612 | 1.958727  |
| H | 2.889293  | 2.437323  | 0.005071  |

| 4-c  |            |            |            |
|------|------------|------------|------------|
| Atom | X axis (Å) | Y axis (Å) | Z axis (Å) |
| C    | 1.542955   | -1.192143  | 0.017479   |
| C    | 1.892167   | 0.143979   | -0.246841  |
| C    | 3.257553   | 0.485155   | -0.338601  |
| C    | 4.234776   | -0.493767  | -0.197464  |
| C    | 3.851117   | -1.80176   | 0.040727   |
| C    | 2.515403   | -2.166528  | 0.153778   |
| O    | 0.25279    | -1.587705  | 0.127684   |
| C    | -0.759364  | -0.589539  | 0.397099   |
| C    | -0.547705  | 0.578845   | -0.569967  |
| C    | 0.850217   | 1.136381   | -0.474869  |
| C    | -2.089228  | -1.291961  | 0.059044   |
| C    | -3.265136  | -0.307298  | 0.04751    |

|   |           |           |           |
|---|-----------|-----------|-----------|
| C | -2.99187  | 0.885669  | -0.872182 |
| C | -1.679809 | 1.595634  | -0.552025 |
| O | 1.097953  | 2.319919  | -0.684154 |
| O | -1.711624 | 2.222343  | 0.73115   |
| C | -4.568161 | -1.010102 | -0.317829 |
| O | -2.008277 | -1.909743 | -1.211603 |
| C | -0.714069 | -0.236322 | 1.898987  |
| O | 0.110059  | 0.85851   | 2.228803  |
| O | 3.639906  | 1.747543  | -0.573173 |
| H | -0.578297 | 0.123589  | -1.568464 |
| H | 5.277325  | -0.216638 | -0.275515 |
| H | 4.613956  | -2.562661 | 0.151253  |
| H | 2.223754  | -3.187482 | 0.357543  |
| H | -2.269908 | -2.053474 | 0.829664  |
| H | -3.371512 | 0.076037  | 1.064455  |
| H | -2.955546 | 0.551571  | -1.912686 |
| H | -3.815413 | 1.600713  | -0.798667 |
| H | -1.471444 | 2.351958  | -1.312499 |
| H | -2.370598 | 2.919103  | 0.727137  |
| H | -4.52691  | -1.406351 | -1.333119 |
| H | -4.770004 | -1.838654 | 0.364325  |
| H | -5.403599 | -0.310251 | -0.257045 |
| H | -1.201396 | -2.433511 | -1.221938 |
| H | -0.321896 | -1.110985 | 2.418753  |
| H | -1.730281 | -0.063868 | 2.258736  |
| H | -0.374353 | 1.646409  | 1.94343   |
| H | 2.826594  | 2.29009   | -0.654087 |

| 4-d  |            |            |            |
|------|------------|------------|------------|
| Atom | X axis (Å) | Y axis (Å) | Z axis (Å) |
| C    | 1.543021   | -1.192071  | 0.017817   |
| C    | 1.892238   | 0.144058   | -0.246677  |
| C    | 3.257639   | 0.485085   | -0.338776  |
| C    | 4.234836   | -0.493937  | -0.197807  |
| C    | 3.851185   | -1.801875  | 0.040591   |
| C    | 2.515445   | -2.16651   | 0.153998   |
| O    | 0.252891   | -1.58757   | 0.128572   |
| C    | -0.759467  | -0.589374  | 0.397485   |
| C    | -0.547638  | 0.578795   | -0.569833  |
| C    | 0.850204   | 1.136442   | -0.474571  |
| C    | -2.089212  | -1.292032  | 0.059335   |
| C    | -3.265241  | -0.307458  | 0.047136   |
| C    | -2.991749  | 0.885338   | -0.872716  |
| C    | -1.67984   | 1.595513   | -0.552282  |

|       |            |            |            |
|-------|------------|------------|------------|
| O     | 1.097796   | 2.320031   | -0.683664  |
| O     | -1.712132  | 2.222461   | 0.730753   |
| C     | -4.568075  | -1.010508  | -0.318491  |
| O     | -2.007742  | -1.910328  | -1.211026  |
| C     | -0.714402  | -0.235702  | 1.899208   |
| O     | 0.109593   | 0.859288   | 2.228608   |
| O     | 3.64017    | 1.747335   | -0.573644  |
| H     | -0.578069  | 0.123348   | -1.568202  |
| H     | 5.277356   | -0.216846  | -0.276202  |
| H     | 4.613986   | -2.562821  | 0.150969   |
| H     | 2.22376    | -3.187405  | 0.357922   |
| H     | -2.270051  | -2.053264  | 0.830147   |
| H     | -3.371956  | 0.076062   | 1.063935   |
| H     | -2.954998  | 0.550996   | -1.913096  |
| H     | -3.815368  | 1.600295   | -0.799659  |
| H     | -1.471397  | 2.35173    | -1.312791  |
| H     | -2.370163  | 2.920058   | 0.726046   |
| H     | -4.52593   | -1.407867  | -1.333277  |
| H     | -4.770627  | -1.838247  | 0.3644     |
| H     | -5.403484  | -0.310532  | -0.259214  |
| H     | -1.200601  | -2.433669  | -1.221049  |
| H     | -0.322316  | -1.110121  | 2.419385   |
| H     | -1.730659  | -0.063161  | 2.258717   |
| H     | -0.374902  | 1.646936   | 1.942692   |
| H     | 2.827148   | 2.290194   | -0.654022  |
| <hr/> |            |            |            |
| <hr/> |            |            |            |
| 4-e   |            |            |            |
| Atom  | X axis (Å) | Y axis (Å) | Z axis (Å) |
| C     | 1.568224   | -1.065399  | -0.255148  |
| C     | 1.927251   | 0.293559   | -0.172708  |
| C     | 3.298873   | 0.630224   | -0.130516  |
| C     | 4.266313   | -0.366584  | -0.184655  |
| C     | 3.871591   | -1.689011  | -0.281661  |
| C     | 2.531766   | -2.054952  | -0.31574   |
| O     | 0.271925   | -1.461557  | -0.290025  |
| C     | -0.731669  | -0.54006   | 0.200888   |
| C     | -0.501783  | 0.827437   | -0.448202  |
| C     | 0.900365   | 1.32716    | -0.215433  |
| C     | -2.069794  | -1.112808  | -0.297883  |
| C     | -3.219455  | -0.143837  | -0.011591  |
| C     | -2.949916  | 1.233933   | -0.622867  |
| C     | -1.615379  | 1.832315   | -0.182019  |
| O     | 1.168236   | 2.523121   | -0.153385  |
| O     | -1.606672  | 2.167139   | 1.201466   |

| C     | -4.553895  | -0.712491  | -0.48222   |
|-------|------------|------------|------------|
| O     | -2.012047  | -1.347298  | -1.69514   |
| C     | -0.632096  | -0.552166  | 1.733372   |
| O     | -0.771035  | -1.85412   | 2.263035   |
| O     | 3.694117   | 1.905732   | -0.049349  |
| H     | -0.53352   | 0.63006    | -1.528161  |
| H     | 5.311649   | -0.091345  | -0.150314  |
| H     | 4.628162   | -2.462703  | -0.323292  |
| H     | 2.229366   | -3.091311  | -0.375817  |
| H     | -2.251352  | -2.054754  | 0.228777   |
| H     | -3.271046  | -0.029074  | 1.07392    |
| H     | -2.952917  | 1.157884   | -1.713539  |
| H     | -3.755976  | 1.92027    | -0.350997  |
| H     | -1.403785  | 2.728674   | -0.771818  |
| H     | -2.251644  | 2.862729   | 1.345229   |
| H     | -4.566112  | -0.834355  | -1.566242  |
| H     | -4.745572  | -1.686573  | -0.027196  |
| H     | -5.369821  | -0.042626  | -0.204514  |
| H     | -1.256116  | -1.917535  | -1.860684  |
| H     | -1.41888   | 0.060954   | 2.160652   |
| H     | 0.322989   | -0.109264  | 2.03703    |
| H     | -0.101158  | -2.413541  | 1.86059    |
| H     | 2.887179   | 2.464446   | -0.048143  |
| <hr/> |            |            |            |
| <hr/> |            |            |            |
| 4-f   |            |            |            |
| <hr/> |            |            |            |
| Atom  | X axis (Å) | Y axis (Å) | Z axis (Å) |
| C     | 1.568316   | -1.100036  | -0.255115  |
| C     | 1.933421   | 0.259785   | -0.175473  |
| C     | 3.303678   | 0.597867   | -0.119566  |
| C     | 4.27066    | -0.397111  | -0.187398  |
| C     | 3.87348    | -1.719341  | -0.293379  |
| C     | 2.53458    | -2.087583  | -0.32301   |
| O     | 0.275352   | -1.491647  | -0.271164  |
| C     | -0.721251  | -0.553563  | 0.194615   |
| C     | -0.481904  | 0.784624   | -0.512095  |
| C     | 0.904617   | 1.284729   | -0.213464  |
| C     | -2.067619  | -1.133028  | -0.268576  |
| C     | -3.201475  | -0.145383  | 0.013417   |
| C     | -2.942145  | 1.201594   | -0.667958  |
| C     | -1.593432  | 1.822361   | -0.330679  |
| O     | 1.145251   | 2.481441   | -0.054901  |
| O     | -1.642015  | 2.350892   | 0.988814   |
| C     | -4.552886  | -0.720088  | -0.398323  |
| O     | -2.032704  | -1.400642  | -1.660796  |

|   |           |           |           |
|---|-----------|-----------|-----------|
| C | -0.630634 | -0.460172 | 1.71807   |
| O | -0.885345 | -1.737405 | 2.272062  |
| O | 3.696059  | 1.873786  | -0.017589 |
| H | -0.466159 | 0.538525  | -1.581853 |
| H | 5.316392  | -0.124126 | -0.148597 |
| H | 4.630394  | -2.492479 | -0.340912 |
| H | 2.234502  | -3.124734 | -0.378423 |
| H | -2.245877 | -2.059939 | 0.283004  |
| H | -3.223265 | 0.009141  | 1.095006  |
| H | -2.991432 | 1.064427  | -1.750925 |
| H | -3.726258 | 1.911139  | -0.397483 |
| H | -1.397008 | 2.637692  | -1.03315  |
| H | -0.832086 | 2.85217   | 1.123568  |
| H | -5.356168 | -0.034914 | -0.121164 |
| H | -4.597674 | -0.879065 | -1.476827 |
| H | -4.737589 | -1.676596 | 0.095211  |
| H | -1.291951 | -1.991657 | -1.82151  |
| H | -1.346076 | 0.284915  | 2.067149  |
| H | 0.368588  | -0.110398 | 2.000183  |
| H | -0.867374 | -1.655063 | 3.226857  |
| H | 2.89181   | 2.431633  | 0.022079  |

| 4-g  |            |            |            |
|------|------------|------------|------------|
| Atom | X axis (Å) | Y axis (Å) | Z axis (Å) |
| C    | 1.52087    | -1.18074   | 0.0013     |
| C    | 1.872315   | 0.160858   | -0.238119  |
| C    | 3.234054   | 0.498293   | -0.376945  |
| C    | 4.207358   | -0.492572  | -0.327255  |
| C    | 3.822532   | -1.805753  | -0.118499  |
| C    | 2.491779   | -2.165638  | 0.053269   |
| O    | 0.238509   | -1.568832  | 0.201187   |
| C    | -0.788269  | -0.568831  | 0.420331   |
| C    | -0.556544  | 0.592312   | -0.546216  |
| C    | 0.82528    | 1.160589   | -0.387968  |
| C    | -2.109638  | -1.272458  | 0.052292   |
| C    | -3.283477  | -0.286607  | 0.042171   |
| C    | -3.003007  | 0.909041   | -0.873343  |
| C    | -1.690023  | 1.618092   | -0.575342  |
| O    | 1.054671   | 2.364457   | -0.476123  |
| O    | -1.819384  | 2.334969   | 0.644558   |
| C    | -4.585152  | -0.984259  | -0.338236  |
| O    | -2.006752  | -1.866848  | -1.227712  |
| C    | -0.791809  | -0.207219  | 1.909717   |
| O    | 0.303792   | 0.58747    | 2.319595   |

|   |           |           |           |
|---|-----------|-----------|-----------|
| O | 3.612992  | 1.768426  | -0.572564 |
| H | -0.541929 | 0.132615  | -1.543568 |
| H | 5.247671  | -0.221517 | -0.445211 |
| H | 4.582766  | -2.575802 | -0.075157 |
| H | 2.204163  | -3.190532 | 0.242226  |
| H | -2.300131 | -2.048273 | 0.804908  |
| H | -3.396711 | 0.085206  | 1.062693  |
| H | -2.975814 | 0.567616  | -1.911265 |
| H | -3.817555 | 1.631471  | -0.793732 |
| H | -1.47612  | 2.323003  | -1.384442 |
| H | -0.991983 | 2.80047   | 0.797415  |
| H | -5.41948  | -0.283011 | -0.279064 |
| H | -4.536441 | -1.372596 | -1.356345 |
| H | -4.794508 | -1.817683 | 0.33572   |
| H | -1.224826 | -2.426635 | -1.222223 |
| H | -0.832096 | -1.142676 | 2.475804  |
| H | -1.680869 | 0.374975  | 2.132751  |
| H | 1.078364  | 0.030328  | 2.423187  |
| H | 2.80727   | 2.325257  | -0.558155 |

| 4-h  |            |            |            |
|------|------------|------------|------------|
| Atom | X axis (Å) | Y axis (Å) | Z axis (Å) |
| C    | 1.524335   | -1.181584  | 0.023486   |
| C    | 1.876878   | 0.153555   | -0.241273  |
| C    | 3.238151   | 0.487583   | -0.383911  |
| C    | 4.21133    | -0.502344  | -0.319211  |
| C    | 3.825239   | -1.812004  | -0.088869  |
| C    | 2.49439    | -2.166943  | 0.089655   |
| O    | 0.242055   | -1.567828  | 0.222816   |
| C    | -0.78505   | -0.568174  | 0.430548   |
| C    | -0.551613  | 0.585957   | -0.544848  |
| C    | 0.832514   | 1.152783   | -0.39631   |
| C    | -2.105346  | -1.275253  | 0.059185   |
| C    | -3.28137   | -0.291726  | 0.030109   |
| C    | -2.994893  | 0.900193   | -0.888341  |
| C    | -1.684739  | 1.611217   | -0.582513  |
| O    | 1.062319   | 2.355977   | -0.500697  |
| O    | -1.82348   | 2.330615   | 0.635209   |
| C    | -4.576981  | -0.995355  | -0.360243  |
| O    | -1.991248  | -1.88006   | -1.214649  |
| C    | -0.801318  | -0.198165  | 1.910171   |
| O    | 0.335531   | 0.581037   | 2.233197   |
| O    | 3.617726   | 1.755913   | -0.598087  |
| H    | -0.540502  | 0.116954   | -1.537755  |

| H     | 5.251879   | -0.234035  | -0.441776  |
|-------|------------|------------|------------|
| H     | 4.584688   | -2.582238  | -0.034151  |
| H     | 2.205876   | -3.188506  | 0.295052   |
| H     | -2.300755  | -2.044761  | 0.816918   |
| H     | -3.406506  | 0.085909   | 1.046905   |
| H     | -2.958725  | 0.554779   | -1.924697  |
| H     | -3.811154  | 1.621724   | -0.818356  |
| H     | -1.465518  | 2.315032   | -1.391164  |
| H     | -0.991183  | 2.782799   | 0.800405   |
| H     | -4.514941  | -1.391841  | -1.374437  |
| H     | -4.792659  | -1.823763  | 0.317901   |
| H     | -5.413438  | -0.295473  | -0.316705  |
| H     | -1.206129  | -2.435189  | -1.199436  |
| H     | -0.806023  | -1.13346   | 2.48024    |
| H     | -1.712996  | 0.356378   | 2.127961   |
| H     | 0.194497   | 0.980071   | 3.093119   |
| H     | 2.811193   | 2.311932   | -0.588144  |
| <hr/> |            |            |            |
| <hr/> |            |            |            |
| 4-i   |            |            |            |
| <hr/> |            |            |            |
| Atom  | X axis (Å) | Y axis (Å) | Z axis (Å) |
| C     | 1.529425   | -1.185178  | 0.023467   |
| C     | 1.882612   | 0.149658   | -0.246397  |
| C     | 3.243893   | 0.486726   | -0.388044  |
| C     | 4.219356   | -0.499482  | -0.319727  |
| C     | 3.834755   | -1.80982   | -0.084764  |
| C     | 2.505766   | -2.167344  | 0.093217   |
| O     | 0.255743   | -1.576811  | 0.22714    |
| C     | -0.783252  | -0.591623  | 0.405912   |
| C     | -0.546645  | 0.580914   | -0.550135  |
| C     | 0.837934   | 1.145731   | -0.39524   |
| C     | -2.10292   | -1.278986  | 0.01713    |
| C     | -3.278482  | -0.284389  | 0.05998    |
| C     | -3.001998  | 0.932489   | -0.827625  |
| C     | -1.671397  | 1.618306   | -0.555517  |
| O     | 1.063897   | 2.351708   | -0.488493  |
| O     | -1.763623  | 2.341975   | 0.664439   |
| C     | -4.589471  | -0.959495  | -0.332839  |
| O     | -1.921829  | -1.819518  | -1.281362  |
| C     | -0.820408  | -0.226775  | 1.890224   |
| O     | 0.348635   | 0.4911     | 2.239618   |
| O     | 3.619662   | 1.756561   | -0.603749  |
| H     | -0.540941  | 0.133493   | -1.552548  |
| H     | 5.259529   | -0.229317  | -0.441325  |
| H     | 4.595986   | -2.578176  | -0.026308  |

|   |           |           |           |
|---|-----------|-----------|-----------|
| H | 2.219845  | -3.189065 | 0.301521  |
| H | -2.287471 | -2.088767 | 0.732993  |
| H | -3.387005 | 0.049953  | 1.093521  |
| H | -3.005287 | 0.613032  | -1.87313  |
| H | -3.804047 | 1.66437   | -0.714108 |
| H | -1.465433 | 2.319567  | -1.369861 |
| H | -0.924542 | 2.79427   | 0.792506  |
| H | -5.425732 | -0.27478  | -0.184052 |
| H | -4.59183  | -1.246563 | -1.387605 |
| H | -4.77314  | -1.852097 | 0.269442  |
| H | -2.662076 | -2.397458 | -1.474583 |
| H | -0.882357 | -1.163593 | 2.454782  |
| H | -1.703562 | 0.374506  | 2.095108  |
| H | 0.191387  | 0.93571   | 3.073808  |
| H | 2.811777  | 2.310406  | -0.588753 |

| 4-j  |            |            |            |
|------|------------|------------|------------|
| Atom | X axis (Å) | Y axis (Å) | Z axis (Å) |
| C    | 1.52727    | -1.181616  | -0.000581  |
| C    | 1.878587   | 0.16047    | -0.241807  |
| C    | 3.239861   | 0.501407   | -0.381782  |
| C    | 4.215731   | -0.48584   | -0.333417  |
| C    | 3.833136   | -1.800275  | -0.122306  |
| C    | 2.504525   | -2.163409  | 0.050882   |
| O    | 0.25384    | -1.575601  | 0.208249   |
| C    | -0.787186  | -0.591429  | 0.396116   |
| C    | -0.55078   | 0.590542   | -0.547607  |
| C    | 0.830989   | 1.157026   | -0.38097   |
| C    | -2.105414  | -1.275387  | 0.002663   |
| C    | -3.279197  | -0.280502  | 0.066694   |
| C    | -3.008715  | 0.942538   | -0.814248  |
| C    | -1.676929  | 1.627292   | -0.54497   |
| O    | 1.055942   | 2.363881   | -0.453208  |
| O    | -1.764619  | 2.344832   | 0.678548   |
| C    | -4.595012  | -0.950588  | -0.318304  |
| O    | -1.930548  | -1.797537  | -1.304291  |
| C    | -0.819559  | -0.241515  | 1.892177   |
| O    | 0.314911   | 0.473619   | 2.338942   |
| O    | 3.614282   | 1.773735   | -0.575989  |
| H    | -0.539797  | 0.15426    | -1.555015  |
| H    | 5.255392   | -0.212518  | -0.451694  |
| H    | 4.595315   | -2.568502  | -0.078561  |
| H    | 2.220274   | -3.188993  | 0.241187   |
| H    | -2.286368  | -2.095376  | 0.707745   |



|   |           |           |           |
|---|-----------|-----------|-----------|
| H | -3.376142 | 0.045017  | 1.104359  |
| H | -3.018609 | 0.630154  | -1.861766 |
| H | -3.809775 | 1.673758  | -0.69057  |
| H | -1.47475  | 2.332057  | -1.357157 |
| H | -0.932023 | 2.811032  | 0.798808  |
| H | -5.428713 | -0.265703 | -0.156701 |
| H | -4.60791  | -1.230301 | -1.374986 |
| H | -4.774099 | -1.84718  | 0.279282  |
| H | -2.672153 | -2.371852 | -1.503098 |
| H | -0.936203 | -1.17799  | 2.446292  |
| H | -1.670269 | 0.399506  | 2.098721  |
| H | 1.054283  | -0.131288 | 2.431746  |
| H | 2.807253  | 2.328208  | -0.55184  |

| 4-k  |            |            |            |
|------|------------|------------|------------|
| Atom | X axis (Å) | Y axis (Å) | Z axis (Å) |
| C    | 1.569436   | -1.074252  | -0.265224  |
| C    | 1.933863   | 0.283691   | -0.172211  |
| C    | 3.30584    | 0.616166   | -0.114622  |
| C    | 4.270618   | -0.382932  | -0.163268  |
| C    | 3.872091   | -1.704067  | -0.271644  |
| C    | 2.532193   | -2.065971  | -0.321585  |
| O    | 0.275709   | -1.460617  | -0.323559  |
| C    | -0.720454  | -0.549729  | 0.189123   |
| C    | -0.493468  | 0.822783   | -0.456673  |
| C    | 0.910019   | 1.319813   | -0.22184   |
| C    | -2.064412  | -1.116535  | -0.304458  |
| C    | -3.20934   | -0.144941  | -0.009827  |
| C    | -2.942997  | 1.229172   | -0.630933  |
| C    | -1.606234  | 1.832716   | -0.202943  |
| O    | 1.18049    | 2.515668   | -0.161828  |
| O    | -1.596986  | 2.197022   | 1.173346   |
| C    | -4.54941   | -0.712799  | -0.465435  |
| O    | -2.013652  | -1.343853  | -1.703562  |
| C    | -0.624857  | -0.541707  | 1.714996   |
| O    | -0.805252  | -1.863816  | 2.189784   |
| O    | 3.703705   | 1.891081   | -0.024445  |
| H    | -0.522009  | 0.622207   | -1.536057  |
| H    | 5.316528   | -0.111591  | -0.11664   |
| H    | 4.62705    | -2.479661  | -0.309498  |
| H    | 2.227329   | -3.101025  | -0.3893    |
| H    | -2.244347  | -2.060048  | 0.218345   |
| H    | -3.249923  | -0.026222  | 1.075875   |
| H    | -2.952537  | 1.144704   | -1.720905  |

|   |           |           |           |
|---|-----------|-----------|-----------|
| H | -3.747625 | 1.91759   | -0.359795 |
| H | -1.394847 | 2.717699  | -0.809955 |
| H | -2.241615 | 2.896     | 1.30138   |
| H | -4.57262  | -0.838413 | -1.5489   |
| H | -4.73812  | -1.685092 | -0.00529  |
| H | -5.361715 | -0.040752 | -0.182245 |
| H | -1.255585 | -1.909643 | -1.874758 |
| H | -1.376631 | 0.138688  | 2.112573  |
| H | 0.355784  | -0.154915 | 2.013382  |
| H | -0.816546 | -1.833243 | 3.147674  |
| H | 2.89799   | 2.451397  | -0.034504 |

---

| 4-I  |            |            |            |
|------|------------|------------|------------|
| Atom | X axis (Å) | Y axis (Å) | Z axis (Å) |
| C    | 1.546648   | -1.210948  | -0.000519  |
| C    | 1.896076   | 0.128858   | -0.252894  |
| C    | 3.260443   | 0.4795     | -0.3261    |
| C    | 4.241614   | -0.494058  | -0.184538  |
| C    | 3.860935   | -1.806498  | 0.039802   |
| C    | 2.527299   | -2.179921  | 0.137224   |
| O    | 0.263763   | -1.616442  | 0.097643   |
| C    | -0.755843  | -0.629667  | 0.358448   |
| C    | -0.541699  | 0.554502   | -0.591935  |
| C    | 0.851428   | 1.114393   | -0.473738  |
| C    | -2.098348  | -1.299688  | 0.028923   |
| C    | -3.257138  | -0.285102  | 0.105552   |
| C    | -2.997826  | 0.918408   | -0.802215  |
| C    | -1.658405  | 1.59576    | -0.551221  |
| O    | 1.084955   | 2.308767   | -0.6477    |
| O    | -1.68723   | 2.293102   | 0.702931   |
| C    | -4.593052  | -0.944694  | -0.223953  |
| O    | -1.983735  | -1.86354   | -1.266633  |
| C    | -0.711996  | -0.289976  | 1.868459   |
| O    | 0.108191   | 0.803585   | 2.209033   |
| O    | 3.635426   | 1.747864   | -0.543477  |
| H    | -0.571652  | 0.115822   | -1.597791  |
| H    | 5.283576   | -0.211203  | -0.248399  |
| H    | 4.626818   | -2.564176  | 0.152417   |
| H    | 2.240629   | -3.204128  | 0.331574   |
| H    | -2.267541  | -2.094167  | 0.767058   |
| H    | -3.32037   | 0.068857   | 1.136187   |
| H    | -3.01752   | 0.589159   | -1.84487   |
| H    | -3.79422   | 1.654689   | -0.680988  |
| H    | -1.470892  | 2.320259   | -1.34427   |

|   |           |           |           |
|---|-----------|-----------|-----------|
| H | -1.311233 | 3.164679  | 0.565463  |
| H | -5.412578 | -0.248089 | -0.041754 |
| H | -4.648348 | -1.237507 | -1.27588  |
| H | -4.760599 | -1.831092 | 0.391833  |
| H | -2.76515  | -2.393359 | -1.435431 |
| H | -0.314396 | -1.169634 | 2.374955  |
| H | -1.724649 | -0.126704 | 2.240768  |
| H | -0.383337 | 1.587553  | 1.923873  |
| H | 2.819697  | 2.287148  | -0.616894 |

**Table S7.** Energy of all conformers of diaporthone E (**5**).

| compound | conformer  | E (kcal/mol) | rel.E(kcal/mol) | Boltzmann dist (%) |
|----------|------------|--------------|-----------------|--------------------|
| <b>5</b> | <b>5-a</b> | -743961.4245 | 0               | 86.46%             |
|          | <b>5-b</b> | -743960.3269 | 1.097652113     | 13.54%             |

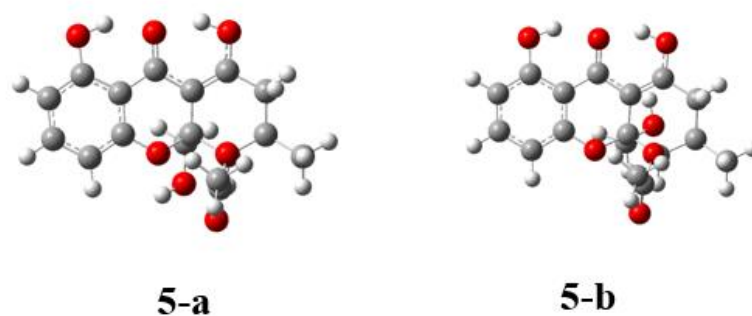

**Figure S60.** B3LYP/6-311g\*\* optimized low-energy conformers of diaporthone E (**5**).

**Table S8.** Cartesian coordinates of the low-energy reoptimized conformers of **5** calculated at b3lyp/6-311g\*\* level of theory in PCM for methanol.

| <b>5-a</b> |             |             |             |
|------------|-------------|-------------|-------------|
| Atom       | X axis (Å)  | Y axis (Å)  | Z axis (Å)  |
| C          | 1.59118100  | -1.08256200 | 0.20148800  |
| C          | 2.23139300  | 0.14659600  | -0.07740000 |
| C          | 3.63325600  | 0.15078900  | -0.31071000 |
| C          | 4.35836900  | -1.03945100 | -0.22990100 |
| C          | 3.69237900  | -2.22802100 | 0.04599500  |
| C          | 2.31391800  | -2.26794800 | 0.25775800  |
| O          | 0.24350900  | -1.16477600 | 0.38079300  |
| C          | -0.47872800 | 0.03266500  | 0.79045200  |

|       |             |             |             |
|-------|-------------|-------------|-------------|
| C     | 0.02688100  | 1.26003800  | 0.06838000  |
| C     | 1.43423500  | 1.35506000  | -0.22352600 |
| C     | -1.95704200 | -0.24883200 | 0.46796900  |
| C     | -2.81997600 | 1.00351600  | 0.66316800  |
| C     | -2.31805000 | 2.15976200  | -0.21778300 |
| C     | -0.82821600 | 2.26607700  | -0.31024200 |
| O     | 1.95397400  | 2.42778300  | -0.65548300 |
| O     | -0.40127300 | 3.39648400  | -0.85630400 |
| C     | -4.30578900 | 0.72014700  | 0.42248600  |
| O     | -2.05127000 | -0.65327600 | -0.91716000 |
| C     | -0.25808600 | 0.15890800  | 2.31707000  |
| O     | -0.71243500 | -0.98106300 | 3.02950600  |
| O     | 4.28547800  | 1.28591600  | -0.61597500 |
| C     | -2.33750800 | -1.94802400 | -1.19841800 |
| C     | -2.30924900 | -2.18167100 | -2.68461700 |
| O     | -2.58264200 | -2.78353400 | -0.36234700 |
| H     | 5.42703200  | -1.01478100 | -0.40035500 |
| H     | 4.25913400  | -3.15054300 | 0.09943500  |
| H     | 1.79802400  | -3.19503200 | 0.47026600  |
| H     | -2.30634700 | -1.06637600 | 1.09428300  |
| H     | -2.70523000 | 1.29825300  | 1.71025200  |
| H     | -2.68317400 | 2.03651900  | -1.24496600 |
| H     | -2.71592500 | 3.11536400  | 0.13444900  |
| H     | 0.59217800  | 3.33932000  | -0.89703500 |
| H     | -4.48329900 | 0.40130000  | -0.60759200 |
| H     | -4.66655100 | -0.06415600 | 1.09243000  |
| H     | -4.90015600 | 1.61896600  | 0.60434300  |
| H     | -0.80791600 | 1.01659000  | 2.70445900  |
| H     | 0.80801800  | 0.34366600  | 2.49677800  |
| H     | -0.23438100 | -1.74531300 | 2.68591600  |
| H     | 3.60515400  | 1.99331400  | -0.70986000 |
| H     | -1.29660100 | -2.01432800 | -3.05869300 |
| H     | -2.96848600 | -1.47346200 | -3.18986300 |
| H     | -2.61800200 | -3.20187400 | -2.90150500 |
| <hr/> |             |             |             |
| 5-b   |             |             |             |
| <hr/> |             |             |             |
| Atom  | X axis (Å)  | Y axis (Å)  | Z axis (Å)  |
| <hr/> |             |             |             |
| C     | -1.53493100 | 1.06682300  | 0.36327100  |
| C     | -2.13359100 | -0.10320500 | -0.15437800 |

|   |             |             |             |
|---|-------------|-------------|-------------|
| C | -3.50903200 | -0.07085600 | -0.50580400 |
| C | -4.25254100 | 1.09622800  | -0.31768300 |
| C | -3.62746900 | 2.22857400  | 0.19135200  |
| C | -2.27404500 | 2.23312800  | 0.53020900  |
| O | -0.21491500 | 1.12504900  | 0.68287800  |
| C | 0.54621700  | -0.09710800 | 0.88361900  |
| C | 0.07638000  | -1.20968500 | -0.02855800 |
| C | -1.31497600 | -1.27936900 | -0.39474000 |
| C | 2.01197400  | 0.28029700  | 0.58876000  |
| C | 2.92513000  | -0.95144600 | 0.61607300  |
| C | 2.45068200  | -2.00798700 | -0.39602700 |
| C | 0.96416000  | -2.12900800 | -0.52984400 |
| O | -1.79605400 | -2.29297900 | -0.98694000 |
| O | 0.57991000  | -3.17495900 | -1.25176900 |
| C | 4.39596100  | -0.58553100 | 0.39368800  |
| O | 2.07035300  | 0.86112800  | -0.73360700 |
| C | 0.39521900  | -0.46230700 | 2.38341000  |
| O | -0.94199900 | -0.76533200 | 2.74485000  |
| O | -4.12069900 | -1.14953600 | -1.02634100 |
| C | 2.30642500  | 2.19139300  | -0.85263100 |
| C | 2.24716100  | 2.60744200  | -2.29729100 |
| O | 2.53536300  | 2.92330100  | 0.07938800  |
| H | -5.30171800 | 1.09824100  | -0.58403900 |
| H | -4.20660000 | 3.13444700  | 0.33003200  |
| H | -1.78927600 | 3.11599200  | 0.92550500  |
| H | 2.34543700  | 1.03089800  | 1.30487100  |
| H | 2.84078100  | -1.37751500 | 1.61975300  |
| H | 2.82784100  | -1.76448700 | -1.39709500 |
| H | 2.86182500  | -2.99050600 | -0.14825200 |
| H | -0.41354800 | -3.13317900 | -1.30966600 |
| H | 5.02302300  | -1.47850600 | 0.45372000  |
| H | 4.54464900  | -0.13504000 | -0.59062400 |
| H | 4.74212000  | 0.12079000  | 1.15221600  |
| H | 0.79260700  | 0.36279100  | 2.98538400  |
| H | 0.97619700  | -1.36016900 | 2.59662700  |
| H | -1.42315700 | 0.06080800  | 2.85912700  |
| H | -3.42854200 | -1.84232500 | -1.14475400 |
| H | 2.92744300  | 1.99574300  | -2.89274700 |

|   |            |            |             |
|---|------------|------------|-------------|
| H | 2.51173300 | 3.65863000 | -2.38758200 |
| H | 1.23717000 | 2.44569800 | -2.68069400 |

**Table S9.** Energy of all conformers of compound 7.

| compound | conformer | E <sub>tot</sub> (a.u.) | G <sub>298.15</sub> (a.u.) | P (%)  |
|----------|-----------|-------------------------|----------------------------|--------|
| 7        | 7-a       | -1109.054472            | -1108.776343               | 26.32% |
|          | 7-b       | -1109.052785            | -1108.775977               | 17.86% |
|          | 7-c       | -1109.053205            | -1108.775397               | 9.66%  |
|          | 7-d       | -1109.051862            | -1108.77532                | 8.90%  |
|          | 7-e       | -1109.052834            | -1108.774784               | 5.05%  |
|          | 7-f       | -1109.053063            | -1108.774674               | 4.49%  |
|          | 7-g       | -1109.052609            | -1108.774589               | 4.10%  |
|          | 7-h       | -1109.050718            | -1108.774418               | 3.42%  |
|          | 7-i       | -1109.050883            | -1108.774339               | 3.15%  |
|          | 7-j       | -1109.052817            | -1108.774138               | 2.55%  |
|          | 7-k       | -1109.052338            | -1108.77403                | 2.27%  |
|          | 7-l       | -1109.051143            | -1108.773722               | 1.64%  |
|          | 7-m       | -1109.050781            | -1108.773559               | 1.38%  |
|          | 7-n       | -1109.049731            | -1108.773361               | 1.12%  |
|          | 7-o       | -1109.051055            | -1108.773331               | 1.08%  |

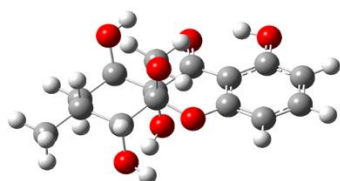

7-a

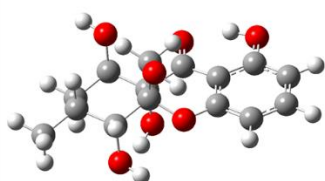

7-b

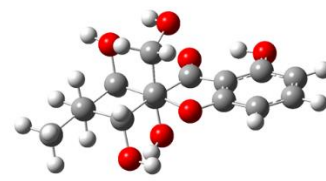

7-c

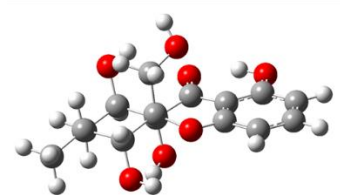

7-d

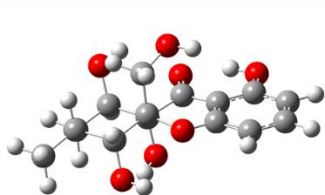

7-e

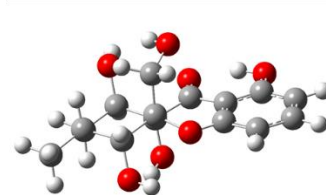

7-f

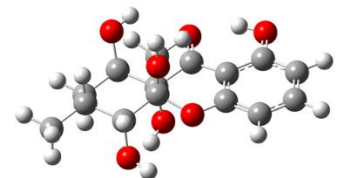

7-g

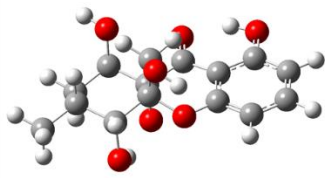

7-h

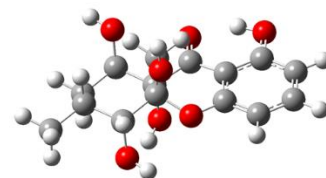

7-i

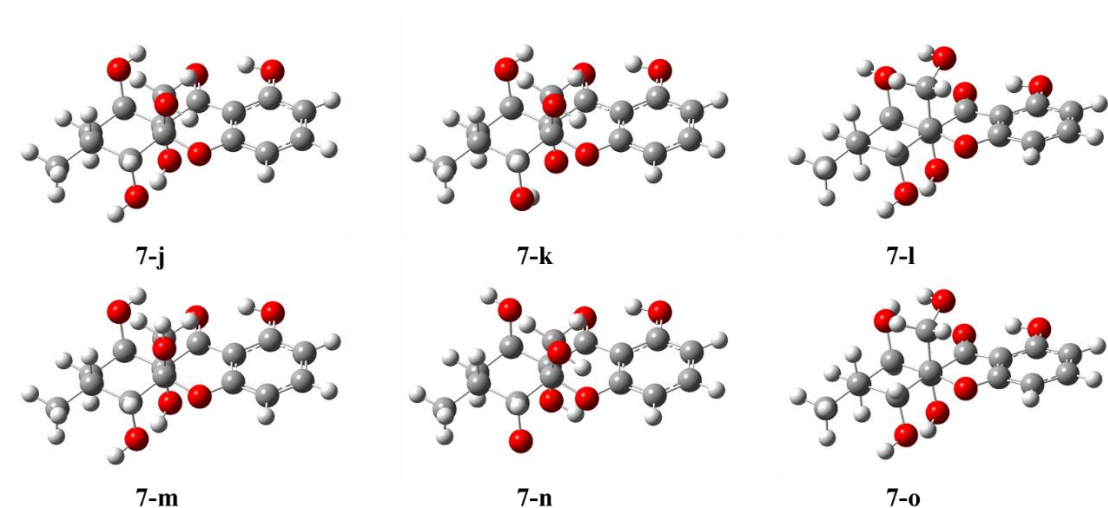

**Figure S61.** B3LYP/6-311g\*\* optimized low-energy conformers of compound 7.

**Table S10.** Cartesian coordinates of the low-energy reoptimized conformers of 7 calculated at b3lyp/6-311g\*\* level of theory in PCM for methanol.

| 7-a  |            |            |            |
|------|------------|------------|------------|
| Atom | X axis (Å) | Y axis (Å) | Z axis (Å) |
| C    | 4.285627   | -0.408753  | -0.154737  |
| C    | 3.886582   | -1.726737  | -0.292651  |
| C    | 2.54666    | -2.093808  | -0.312254  |
| C    | 1.583408   | -1.108615  | -0.205751  |
| C    | 1.949179   | 0.248826   | -0.095039  |
| C    | 3.320424   | 0.584163   | -0.044431  |
| O    | 0.288708   | -1.507505  | -0.196703  |
| C    | -0.702484  | -0.565916  | 0.262419   |
| C    | -0.469973  | 0.781928   | -0.45469   |
| C    | 0.926322   | 1.275798   | -0.081445  |
| C    | -2.064429  | -1.154968  | -0.141186  |
| C    | -3.190774  | -0.16301   | 0.159252   |
| C    | -2.939849  | 1.193429   | -0.50724   |
| C    | -1.58575   | 1.805334   | -0.173521  |
| O    | 3.717231   | 1.855074   | 0.092121   |
| O    | 1.15262    | 2.461011   | 0.1412     |
| O    | -1.595012  | 2.248919   | 1.173467   |
| O    | -0.374273  | 0.603685   | -1.859644  |
| C    | -0.572728  | -0.488133  | 1.796368   |
| O    | -0.750107  | -1.751764  | 2.397862   |
| O    | -2.07768   | -1.465213  | -1.536731  |
| C    | -4.54967   | -0.731554  | -0.234082  |
| H    | 5.331833   | -0.137111  | -0.121749  |
| H    | 4.641993   | -2.498566  | -0.372784  |

| H          | 2.245344   | -3.1291    | -0.391404  |
|------------|------------|------------|------------|
| H          | -2.226829  | -2.070207  | 0.431233   |
| H          | -3.194189  | -0.018488  | 1.241999   |
| H          | -3.014797  | 1.083248   | -1.59149   |
| H          | -3.716542  | 1.899211   | -0.208848  |
| H          | -1.398421  | 2.650157   | -0.841992  |
| H          | 2.920373   | 2.415473   | 0.176167   |
| H          | -0.80563   | 2.7827     | 1.305052   |
| H          | -0.984172  | -0.112622  | -2.103237  |
| H          | 0.40371    | -0.069071  | 2.060233   |
| H          | -1.326051  | 0.178208   | 2.20287    |
| H          | -0.072537  | -2.344584  | 2.061501   |
| H          | -1.543969  | -2.252596  | -1.672302  |
| H          | -5.344767  | -0.047748  | 0.067719   |
| H          | -4.726777  | -1.69341   | 0.251491   |
| H          | -4.61573   | -0.877061  | -1.313111  |
| <hr/>      |            |            |            |
| <hr/>      |            |            |            |
| <b>7-b</b> |            |            |            |
| <hr/>      |            |            |            |
| Atom       | X axis (Å) | Y axis (Å) | Z axis (Å) |
| C          | 4.288384   | -0.400405  | -0.134907  |
| C          | 3.88849    | -1.716442  | -0.282858  |
| C          | 2.547289   | -2.076278  | -0.324689  |
| C          | 1.587367   | -1.087099  | -0.222612  |
| C          | 1.952019   | 0.267252   | -0.090944  |
| C          | 3.32498    | 0.596632   | -0.03767   |
| O          | 0.290624   | -1.481362  | -0.255592  |
| C          | -0.699013  | -0.56548   | 0.252618   |
| C          | -0.479135  | 0.816133   | -0.404935  |
| C          | 0.934377   | 1.307178   | -0.084951  |
| C          | -2.060241  | -1.145471  | -0.175759  |
| C          | -3.19741   | -0.170948  | 0.142078   |
| C          | -2.944211  | 1.213213   | -0.463022  |
| C          | -1.596122  | 1.805783   | -0.053624  |
| O          | 3.727314   | 1.866033   | 0.094557   |
| O          | 1.191881   | 2.495959   | 0.045738   |
| O          | -1.537676  | 2.092488   | 1.335421   |
| O          | -0.424985  | 0.69998    | -1.820608  |
| C          | -0.561031  | -0.572914  | 1.788503   |
| O          | -0.677553  | -1.879717  | 2.308891   |
| O          | -2.063719  | -1.419615  | -1.579141  |
| C          | -4.546732  | -0.733931  | -0.289989  |
| H          | 5.334798   | -0.130549  | -0.092661  |
| H          | 4.642081   | -2.49055   | -0.357805  |
| H          | 2.241051   | -3.108663  | -0.422213  |



|   |           |           |           |
|---|-----------|-----------|-----------|
| H | -2.221236 | -2.077079 | 0.37055   |
| H | -3.215066 | -0.064015 | 1.229129  |
| H | -2.994427 | 1.160296  | -1.553158 |
| H | -3.736013 | 1.897815  | -0.150309 |
| H | -1.39771  | 2.713292  | -0.629863 |
| H | 2.927608  | 2.430925  | 0.131385  |
| H | -2.134999 | 2.820506  | 1.517668  |
| H | -1.009437 | -0.032799 | -2.079287 |
| H | 0.397056  | -0.126601 | 2.072857  |
| H | -1.340752 | 0.029024  | 2.240677  |
| H | 0.004714  | -2.425876 | 1.908973  |
| H | -1.506988 | -2.187516 | -1.733764 |
| H | -4.595934 | -0.846103 | -1.373778 |
| H | -5.350246 | -0.064201 | 0.021211  |
| H | -4.72566  | -1.711366 | 0.162824  |

| 7-c  |            |            |            |
|------|------------|------------|------------|
| Atom | X axis (Å) | Y axis (Å) | Z axis (Å) |
| C    | 4.257661   | -0.515787  | -0.122021  |
| C    | 3.867154   | -1.822698  | 0.109496   |
| C    | 2.529162   | -2.180787  | 0.218512   |
| C    | 1.562019   | -1.201736  | 0.083362   |
| C    | 1.918829   | 0.133946   | -0.175819  |
| C    | 3.285579   | 0.468375   | -0.261295  |
| O    | 0.269806   | -1.591913  | 0.196506   |
| C    | -0.72441   | -0.585272  | 0.463979   |
| C    | -0.525734  | 0.568927   | -0.543198  |
| C    | 0.887679   | 1.137896   | -0.389718  |
| C    | -2.07994   | -1.278652  | 0.212428   |
| C    | -3.242529  | -0.277302  | 0.213098   |
| C    | -2.98916   | 0.907759   | -0.723841  |
| C    | -1.655478  | 1.601889   | -0.459128  |
| O    | 3.677378   | 1.730023   | -0.488074  |
| O    | 1.127888   | 2.322902   | -0.575477  |
| O    | -1.628476  | 2.221528   | 0.823395   |
| O    | -0.489041  | 0.083261   | -1.878427  |
| C    | -0.635705  | -0.192     | 1.958406   |
| O    | 0.226647   | 0.880598   | 2.257227   |
| O    | -2.059313  | -1.960141  | -1.041115  |
| C    | -4.565886  | -0.967341  | -0.09843   |
| H    | 5.301682   | -0.243126  | -0.195721  |
| H    | 4.625907   | -2.587769  | 0.218945   |
| H    | 2.231891   | -3.200797  | 0.418861   |
| H    | -2.241891  | -2.009865  | 1.01215    |

|       |            |            |            |
|-------|------------|------------|------------|
| H     | -3.309967  | 0.118141   | 1.22833    |
| H     | -3.016504  | 0.581593   | -1.765856  |
| H     | -3.793701  | 1.637839   | -0.608513  |
| H     | -1.459371  | 2.34901    | -1.231246  |
| H     | 2.872472   | 2.283297   | -0.558854  |
| H     | -2.216257  | 2.978981   | 0.820914   |
| H     | -1.049641  | -0.70864   | -1.925644  |
| H     | -1.636896  | 0.013011   | 2.339151   |
| H     | -0.256213  | -1.071892  | 2.478689   |
| H     | -0.25084   | 1.681342   | 1.998323   |
| H     | -1.425109  | -2.679928  | -0.972035  |
| H     | -5.388904  | -0.256911  | -0.004606  |
| H     | -4.749245  | -1.791991  | 0.593394   |
| H     | -4.571948  | -1.365655  | -1.113559  |
| <hr/> |            |            |            |
| <hr/> |            |            |            |
| 7-d   |            |            |            |
| Atom  | X axis (Å) | Y axis (Å) | Z axis (Å) |
| C     | 4.236847   | -0.525578  | -0.22336   |
| C     | 3.843687   | -1.832688  | 0.006638   |
| C     | 2.509334   | -2.181636  | 0.173764   |
| C     | 1.544316   | -1.193844  | 0.093497   |
| C     | 1.904856   | 0.139626   | -0.173032  |
| C     | 3.268038   | 0.467889   | -0.300793  |
| O     | 0.258138   | -1.575248  | 0.285303   |
| C     | -0.750621  | -0.56676   | 0.491148   |
| C     | -0.527828  | 0.569021   | -0.529243  |
| C     | 0.870906   | 1.146577   | -0.325353  |
| C     | -2.101019  | -1.264348  | 0.215313   |
| C     | -3.26073   | -0.260042  | 0.199918   |
| C     | -2.990997  | 0.923589   | -0.735741  |
| C     | -1.65487   | 1.614688   | -0.498604  |
| O     | 3.657666   | 1.734008   | -0.51378   |
| O     | 1.091258   | 2.349338   | -0.412749  |
| O     | -1.710661  | 2.336754   | 0.720113   |
| O     | -0.445129  | 0.060246   | -1.85469   |
| C     | -0.725011  | -0.147738  | 1.964177   |
| O     | 0.418397   | 0.62918    | 2.2667     |
| O     | -2.057713  | -1.943466  | -1.0383    |
| C     | -4.579873  | -0.946157  | -0.138501  |
| H     | 5.279518   | -0.261212  | -0.335832  |
| H     | 4.599522   | -2.605668  | 0.071194   |
| H     | 2.214782   | -3.201246  | 0.380243   |
| H     | -2.277033  | -1.998111  | 1.00875    |
| H     | -3.348394  | 0.127732   | 1.216552   |

|   |           |           |           |
|---|-----------|-----------|-----------|
| H | -3.024397 | 0.584261  | -1.773353 |
| H | -3.78548  | 1.663207  | -0.623031 |
| H | -1.457043 | 2.302047  | -1.326098 |
| H | 2.860274  | 2.29974   | -0.503435 |
| H | -0.897595 | 2.846002  | 0.788628  |
| H | -1.02716  | -0.714916 | -1.912945 |
| H | -1.628853 | 0.410181  | 2.19381   |
| H | -0.71913  | -1.072524 | 2.550523  |
| H | 0.183476  | 1.262763  | 2.945775  |
| H | -1.441884 | -2.677229 | -0.953944 |
| H | -5.402382 | -0.233379 | -0.059507 |
| H | -4.779453 | -1.771883 | 0.547551  |
| H | -4.566629 | -1.341838 | -1.154628 |

| 7-e  |            |            |            |
|------|------------|------------|------------|
| Atom | X axis (Å) | Y axis (Å) | Z axis (Å) |
| C    | 4.232561   | -0.510807  | -0.238545  |
| C    | 3.841033   | -1.822549  | -0.035663  |
| C    | 2.507179   | -2.17762   | 0.124539   |
| C    | 1.540516   | -1.190269  | 0.064062   |
| C    | 1.899516   | 0.15117    | -0.171569  |
| C    | 3.26338    | 0.48366    | -0.295541  |
| O    | 0.255406   | -1.575067  | 0.256287   |
| C    | -0.754033  | -0.569175  | 0.479026   |
| C    | -0.534051  | 0.582157   | -0.524171  |
| C    | 0.863313   | 1.158951   | -0.312361  |
| C    | -2.104455  | -1.261799  | 0.195793   |
| C    | -3.261978  | -0.255842  | 0.207418   |
| C    | -2.998378  | 0.938334   | -0.716553  |
| C    | -1.661753  | 1.627198   | -0.475735  |
| O    | 3.651334   | 1.752529   | -0.484267  |
| O    | 1.08326    | 2.362484   | -0.376665  |
| O    | -1.717184  | 2.330242   | 0.752924   |
| O    | -0.449401  | 0.094254   | -1.857193  |
| C    | -0.720474  | -0.17474   | 1.966173   |
| O    | 0.392882   | 0.601748   | 2.355685   |
| O    | -2.069172  | -1.915646  | -1.071814  |
| C    | -4.586426  | -0.934342  | -0.125332  |
| H    | 5.274884   | -0.243231  | -0.345847  |
| H    | 4.597947   | -2.595469  | 0.01347    |
| H    | 2.21441    | -3.20158   | 0.310499   |
| H    | -2.276832  | -2.011267  | 0.975198   |
| H    | -3.336189  | 0.118867   | 1.230155   |
| H    | -3.036964  | 0.611082   | -1.757862  |

|   |           |           |           |
|---|-----------|-----------|-----------|
| H | -3.792396 | 1.676395  | -0.591128 |
| H | -1.466577 | 2.325896  | -1.294478 |
| H | 2.854429  | 2.318711  | -0.465068 |
| H | -0.896335 | 2.823129  | 0.844197  |
| H | -1.033448 | -0.678439 | -1.92835  |
| H | -1.594728 | 0.423386  | 2.199721  |
| H | -0.766551 | -1.106229 | 2.538225  |
| H | 1.160739  | 0.0333    | 2.448765  |
| H | -1.462849 | -2.65882  | -1.003598 |
| H | -5.406623 | -0.221551 | -0.025313 |
| H | -4.779193 | -1.770338 | 0.550128  |
| H | -4.586432 | -1.314163 | -1.147633 |

| 7-f  |            |            |            |
|------|------------|------------|------------|
| Atom | X axis (Å) | Y axis (Å) | Z axis (Å) |
| C    | 4.255292   | -0.519375  | -0.123212  |
| C    | 3.865672   | -1.827793  | 0.10212    |
| C    | 2.528272   | -2.188347  | 0.211636   |
| C    | 1.559405   | -1.210378  | 0.081715   |
| C    | 1.916084   | 0.126845   | -0.17369   |
| C    | 3.282123   | 0.464355   | -0.25563   |
| O    | 0.267884   | -1.601705  | 0.199958   |
| C    | -0.727066  | -0.593732  | 0.461371   |
| C    | -0.524157  | 0.55385    | -0.55201   |
| C    | 0.883111   | 1.127165   | -0.382933  |
| C    | -2.085245  | -1.282531  | 0.216853   |
| C    | -3.241002  | -0.272824  | 0.231107   |
| C    | -2.989392  | 0.908546   | -0.710648  |
| C    | -1.649218  | 1.596765   | -0.480674  |
| O    | 3.671024   | 1.728401   | -0.474059  |
| O    | 1.112817   | 2.319446   | -0.542257  |
| O    | -1.653974  | 2.287528   | 0.772096   |
| O    | -0.479195  | 0.05878    | -1.883732  |
| C    | -0.64343   | -0.195117  | 1.954751   |
| O    | 0.212054   | 0.88172    | 2.255155   |
| O    | -2.078356  | -1.959412  | -1.039003  |
| C    | -4.572176  | -0.953111  | -0.068642  |
| H    | 5.299109   | -0.245646  | -0.195477  |
| H    | 4.6253     | -2.592598  | 0.20719    |
| H    | 2.233262   | -3.209489  | 0.409452   |
| H    | -2.244706  | -2.015423  | 1.015491   |
| H    | -3.299471  | 0.12179    | 1.247217   |
| H    | -3.032922  | 0.570195   | -1.748329  |
| H    | -3.782169  | 1.647846   | -0.58693   |

|   |           |           |           |
|---|-----------|-----------|-----------|
| H | -1.464711 | 2.31097   | -1.283523 |
| H | 2.866695  | 2.282931  | -0.533494 |
| H | -1.337884 | 3.180158  | 0.620581  |
| H | -1.049882 | -0.725671 | -1.930906 |
| H | -1.646018 | 0.00788   | 2.333663  |
| H | -0.264578 | -1.072361 | 2.479576  |
| H | -0.27418  | 1.673765  | 1.987524  |
| H | -1.461439 | -2.694137 | -0.973259 |
| H | -5.389083 | -0.236907 | 0.033728  |
| H | -4.754765 | -1.777367 | 0.623815  |
| H | -4.590225 | -1.349904 | -1.084277 |

| 7-g  |            |            |            |
|------|------------|------------|------------|
| Atom | X axis (Å) | Y axis (Å) | Z axis (Å) |
| C    | 4.291362   | -0.426388  | -0.1279    |
| C    | 3.889241   | -1.743272  | -0.273226  |
| C    | 2.549093   | -2.106364  | -0.30858   |
| C    | 1.585864   | -1.119156  | -0.209556  |
| C    | 1.956409   | 0.237755   | -0.092892  |
| C    | 3.328122   | 0.568879   | -0.026787  |
| O    | 0.293293   | -1.510346  | -0.222488  |
| C    | -0.692167  | -0.575762  | 0.251587   |
| C    | -0.460141  | 0.776255   | -0.464782  |
| C    | 0.936599   | 1.267293   | -0.087813  |
| C    | -2.058714  | -1.15896   | -0.149293  |
| C    | -3.179086  | -0.163738  | 0.160846   |
| C    | -2.932134  | 1.189151   | -0.514758  |
| C    | -1.575466  | 1.805835   | -0.198343  |
| O    | 3.727167   | 1.839039   | 0.1158     |
| O    | 1.164626   | 2.453347   | 0.131978   |
| O    | -1.581498  | 2.287165   | 1.135569   |
| O    | -0.359981  | 0.593893   | -1.86885   |
| C    | -0.571287  | -0.476105  | 1.777099   |
| O    | -0.812097  | -1.758796  | 2.324269   |
| O    | -2.077883  | -1.460439  | -1.546966  |
| C    | -4.543746  | -0.729952  | -0.21533   |
| H    | 5.338046   | -0.158338  | -0.082434  |
| H    | 4.643387   | -2.51711   | -0.346412  |
| H    | 2.245782   | -3.140645  | -0.392465  |
| H    | -2.21987   | -2.076366  | 0.418397   |
| H    | -3.168855  | -0.016135  | 1.243308   |
| H    | -3.016724  | 1.071401   | -1.597537  |
| H    | -3.706211  | 1.897273   | -0.214995  |
| H    | -1.389622  | 2.63317    | -0.888832  |

|   |           |           |           |
|---|-----------|-----------|-----------|
| H | 2.930693  | 2.401607  | 0.188073  |
| H | -0.783297 | 2.811602  | 1.252671  |
| H | -0.97247  | -0.120433 | -2.111962 |
| H | 0.432989  | -0.12914  | 2.041254  |
| H | -1.279791 | 0.262907  | 2.147623  |
| H | -0.801103 | -1.679453 | 3.279479  |
| H | -1.551696 | -2.252033 | -1.687083 |
| H | -5.334077 | -0.0431   | 0.092179  |
| H | -4.717931 | -1.689593 | 0.275677  |
| H | -4.621966 | -0.879347 | -1.293082 |

| 7-h  |            |            |            |
|------|------------|------------|------------|
| Atom | X axis (Å) | Y axis (Å) | Z axis (Å) |
| C    | 4.293733   | -0.400309  | -0.116917  |
| C    | 3.894522   | -1.714501  | -0.288066  |
| C    | 2.554923   | -2.074797  | -0.351205  |
| C    | 1.59077    | -1.089089  | -0.242982  |
| C    | 1.956234   | 0.263333   | -0.083278  |
| C    | 3.329578   | 0.594291   | -0.01601   |
| O    | 0.299302   | -1.48346   | -0.3057    |
| C    | -0.704252  | -0.591798  | 0.212344   |
| C    | -0.478956  | 0.811404   | -0.384788  |
| C    | 0.939759   | 1.297478   | -0.067688  |
| C    | -2.07522   | -1.156291  | -0.221893  |
| C    | -3.197356  | -0.173311  | 0.165555   |
| C    | -2.947207  | 1.221925   | -0.409276  |
| C    | -1.590788  | 1.797773   | -0.006088  |
| O    | 3.728322   | 1.862247   | 0.135583   |
| O    | 1.190421   | 2.490317   | 0.054306   |
| O    | -1.501281  | 2.057725   | 1.383228   |
| O    | -0.482449  | 0.643413   | -1.805843  |
| C    | -0.565925  | -0.635874  | 1.751357   |
| O    | -0.666214  | -1.95643   | 2.236572   |
| O    | -2.110387  | -1.512352  | -1.589783  |
| C    | -4.561004  | -0.710081  | -0.252019  |
| H    | 5.33969    | -0.131551  | -0.060565  |
| H    | 4.649279   | -2.487162  | -0.366683  |
| H    | 2.251142   | -3.105495  | -0.471132  |
| H    | -2.228908  | -2.086156  | 0.326915   |
| H    | -3.193899  | -0.094387  | 1.255446   |
| H    | -3.011896  | 1.192678   | -1.500104  |
| H    | -3.728131  | 1.908395   | -0.073375  |
| H    | -1.401272  | 2.722861   | -0.562304  |
| H    | 2.929158   | 2.427633   | 0.163881   |

|   |           |           |           |
|---|-----------|-----------|-----------|
| H | -2.112431 | 2.765735  | 1.597091  |
| H | -0.417681 | 1.505204  | -2.22914  |
| H | 0.387645  | -0.187391 | 2.047026  |
| H | -1.35068  | -0.056788 | 2.222879  |
| H | 0.00685   | -2.489136 | 1.804034  |
| H | -1.689596 | -0.801479 | -2.087778 |
| H | -4.627992 | -0.803732 | -1.3368   |
| H | -5.352704 | -0.037779 | 0.084028  |
| H | -4.743147 | -1.694033 | 0.185398  |

| 7-i  |            |            |            |
|------|------------|------------|------------|
| Atom | X axis (Å) | Y axis (Å) | Z axis (Å) |
| C    | 4.292261   | -0.416559  | -0.112359  |
| C    | 3.889102   | -1.731203  | -0.270334  |
| C    | 2.548024   | -2.087041  | -0.327728  |
| C    | 1.588209   | -1.096083  | -0.230783  |
| C    | 1.957587   | 0.257352   | -0.090298  |
| C    | 3.330999   | 0.582508   | -0.021752  |
| O    | 0.294361   | -1.480783  | -0.286836  |
| C    | -0.688346  | -0.57474   | 0.240159   |
| C    | -0.471554  | 0.812793   | -0.413948  |
| C    | 0.943322   | 1.300329   | -0.091722  |
| C    | -2.054417  | -1.149736  | -0.182967  |
| C    | -3.186665  | -0.173441  | 0.144589   |
| C    | -2.938452  | 1.207674   | -0.469843  |
| C    | -1.589033  | 1.807275   | -0.073385  |
| O    | 3.735154   | 1.851207   | 0.118498   |
| O    | 1.20383    | 2.489221   | 0.036087   |
| O    | -1.531647  | 2.126066   | 1.309128   |
| O    | -0.415988  | 0.695605   | -1.82954   |
| C    | -0.554016  | -0.56029   | 1.768103   |
| O    | -0.707822  | -1.888501  | 2.234666   |
| O    | -2.064744  | -1.4157    | -1.588239  |
| C    | -4.541467  | -0.73623   | -0.270408  |
| H    | 5.339096   | -0.150476  | -0.057975  |
| H    | 4.641433   | -2.507108  | -0.340487  |
| H    | 2.239853   | -3.118123  | -0.431348  |
| H    | -2.212585  | -2.083428  | 0.359019   |
| H    | -3.191575  | -0.063131  | 1.231593   |
| H    | -2.995571  | 1.146469   | -1.559206  |
| H    | -3.729384  | 1.893396   | -0.157248  |
| H    | -1.391744  | 2.703013   | -0.667972  |
| H    | 2.935776   | 2.417402   | 0.144233   |
| H    | -2.122198  | 2.864335   | 1.4708     |

|       |            |            |            |
|-------|------------|------------|------------|
| H     | -1.001268  | -0.036764  | -2.087545  |
| H     | 0.42993    | -0.167389  | 2.043891   |
| H     | -1.301632  | 0.106196   | 2.19181    |
| H     | -0.726199  | -1.862495  | 3.192629   |
| H     | -1.512314  | -2.185621  | -1.747812  |
| H     | -5.341028  | -0.064669  | 0.047061   |
| H     | -4.716303  | -1.711949  | 0.187714   |
| H     | -4.602776  | -0.852226  | -1.353213  |
| <hr/> |            |            |            |
| <hr/> |            |            |            |
| 7-j   |            |            |            |
| Atom  | X axis (Å) | Y axis (Å) | Z axis (Å) |
| C     | 4.291911   | -0.412662  | -0.143085  |
| C     | 3.893339   | -1.730634  | -0.28772   |
| C     | 2.554229   | -2.097761  | -0.317135  |
| C     | 1.588533   | -1.113251  | -0.213306  |
| C     | 1.954822   | 0.243519   | -0.095589  |
| C     | 3.326033   | 0.579289   | -0.036147  |
| O     | 0.29696    | -1.514454  | -0.217299  |
| C     | -0.700298  | -0.579815  | 0.236847   |
| C     | -0.465133  | 0.77805    | -0.461706  |
| C     | 0.93192    | 1.268431   | -0.082745  |
| C     | -2.065952  | -1.155108  | -0.159937  |
| C     | -3.184157  | -0.159042  | 0.186359   |
| C     | -2.938093  | 1.201748   | -0.470448  |
| C     | -1.575103  | 1.80283    | -0.157992  |
| O     | 3.720992   | 1.850311   | 0.106482   |
| O     | 1.157361   | 2.454168   | 0.141078   |
| O     | -1.560282  | 2.239769   | 1.191255   |
| O     | -0.368391  | 0.621256   | -1.868822  |
| C     | -0.574208  | -0.514004  | 1.774215   |
| O     | -0.757116  | -1.780588  | 2.366675   |
| O     | -2.012797  | -1.444804  | -1.557231  |
| C     | -4.557546  | -0.710143  | -0.186395  |
| H     | 5.337915   | -0.141246  | -0.10278   |
| H     | 4.649365   | -2.502102  | -0.365865  |
| H     | 2.253575   | -3.132691  | -0.403207  |
| H     | -2.219687  | -2.084887  | 0.392383   |
| H     | -3.170233  | -0.035181  | 1.271227   |
| H     | -3.030431  | 1.098913   | -1.554233  |
| H     | -3.705401  | 1.910237   | -0.154714  |
| H     | -1.395013  | 2.650246   | -0.825105  |
| H     | 2.92273    | 2.409658   | 0.185323   |
| H     | -0.764885  | 2.767398   | 1.312219   |
| H     | -0.961702  | -0.103547  | -2.12712   |



|   |           |           |           |
|---|-----------|-----------|-----------|
| H | 0.405317  | -0.102896 | 2.037925  |
| H | -1.321354 | 0.153891  | 2.188428  |
| H | -0.089668 | -2.377174 | 2.016743  |
| H | -2.858959 | -1.7973   | -1.840711 |
| H | -4.684068 | -0.791032 | -1.269744 |
| H | -5.340456 | -0.041812 | 0.174236  |
| H | -4.722631 | -1.694424 | 0.25661   |

| 7-k  |            |            |            |
|------|------------|------------|------------|
| Atom | X axis (Å) | Y axis (Å) | Z axis (Å) |
| C    | 4.29132    | -0.408484  | -0.143783  |
| C    | 3.892741   | -1.72493   | -0.303949  |
| C    | 2.55429    | -2.093583  | -0.338216  |
| C    | 1.586853   | -1.11229   | -0.221141  |
| C    | 1.953467   | 0.243881   | -0.084953  |
| C    | 3.325351   | 0.581194   | -0.024697  |
| O    | 0.296944   | -1.51332   | -0.233413  |
| C    | -0.70856   | -0.591259  | 0.228953   |
| C    | -0.4685    | 0.776144   | -0.435593  |
| C    | 0.931506   | 1.26508    | -0.057809  |
| C    | -2.078699  | -1.167806  | -0.181145  |
| C    | -3.191169  | -0.163213  | 0.175129   |
| C    | -2.941873  | 1.200558   | -0.471688  |
| C    | -1.58189   | 1.799402   | -0.139952  |
| O    | 3.718471   | 1.850618   | 0.131056   |
| O    | 1.151306   | 2.453027   | 0.16514    |
| O    | -1.569915  | 2.224014   | 1.209329   |
| O    | -0.421071  | 0.537513   | -1.844047  |
| C    | -0.581268  | -0.539055  | 1.767932   |
| O    | -0.752636  | -1.812931  | 2.346428   |
| O    | -2.118434  | -1.568874  | -1.5366    |
| C    | -4.561876  | -0.709723  | -0.205534  |
| H    | 5.337232   | -0.137324  | -0.101154  |
| H    | 4.649411   | -2.494755  | -0.391779  |
| H    | 2.255189   | -3.127643  | -0.438229  |
| H    | -2.236284  | -2.076886  | 0.400037   |
| H    | -3.177699  | -0.037556  | 1.260483   |
| H    | -3.026404  | 1.105538   | -1.557139  |
| H    | -3.709035  | 1.910646   | -0.158787  |
| H    | -1.400938  | 2.661315   | -0.792626  |
| H    | 2.921163   | 2.410088   | 0.213858   |
| H    | -0.776256  | 2.752698   | 1.339143   |
| H    | -0.370353  | 1.378684   | -2.308728  |
| H    | 0.393995   | -0.121979  | 2.039382   |

|       |            |            |            |
|-------|------------|------------|------------|
| H     | -1.336074  | 0.116152   | 2.188439   |
| H     | -0.08696   | -2.40282   | 1.982085   |
| H     | -1.673169  | -0.890711  | -2.058439  |
| H     | -5.346893  | -0.021292  | 0.112741   |
| H     | -4.743018  | -1.675259  | 0.271462   |
| H     | -4.641356  | -0.844773  | -1.285212  |
| <hr/> |            |            |            |
| <hr/> |            |            |            |
| 7-I   |            |            |            |
| Atom  | X axis (Å) | Y axis (Å) | Z axis (Å) |
| C     | 4.265452   | -0.51442   | -0.112874  |
| C     | 3.875393   | -1.822876  | 0.114324   |
| C     | 2.538093   | -2.184131  | 0.212792   |
| C     | 1.567531   | -1.207267  | 0.072443   |
| C     | 1.925435   | 0.129165   | -0.181332  |
| C     | 3.292143   | 0.467072   | -0.257571  |
| O     | 0.279222   | -1.604168  | 0.17087    |
| C     | -0.721881  | -0.60859   | 0.439319   |
| C     | -0.521157  | 0.564099   | -0.547665  |
| C     | 0.893521   | 1.130853   | -0.390733  |
| C     | -2.084384  | -1.282432  | 0.189532   |
| C     | -3.237516  | -0.261751  | 0.240567   |
| C     | -2.986512  | 0.928974   | -0.68744   |
| C     | -1.642384  | 1.604864   | -0.43689   |
| O     | 3.681506   | 1.730778   | -0.479194  |
| O     | 1.131702   | 2.317504   | -0.572167  |
| O     | -1.592304  | 2.211875   | 0.851325   |
| O     | -0.490049  | 0.103205   | -1.891681  |
| C     | -0.635188  | -0.234146  | 1.94249    |
| O     | 0.241375   | 0.821673   | 2.256795   |
| O     | -2.005087  | -1.93698   | -1.074914  |
| C     | -4.580416  | -0.923723  | -0.056324  |
| H     | 5.309446   | -0.239576  | -0.178531  |
| H     | 4.635067   | -2.586488  | 0.228277   |
| H     | 2.241717   | -3.205364  | 0.408183   |
| H     | -2.237394  | -2.035492  | 0.971387   |
| H     | -3.284878  | 0.112597   | 1.26435    |
| H     | -3.027256  | 0.607216   | -1.730554  |
| H     | -3.782097  | 1.66643    | -0.558836  |
| H     | -1.449877  | 2.357606   | -1.204301  |
| H     | 2.87476    | 2.281194   | -0.552841  |
| H     | -2.14908   | 2.992309   | 0.855021   |
| H     | -1.016874  | -0.711094  | -1.947463  |
| H     | -1.632712  | -0.02089   | 2.326449   |
| H     | -0.267406  | -1.126509  | 2.449621   |

|   |           |           |           |
|---|-----------|-----------|-----------|
| H | -0.22519  | 1.632676  | 2.009586  |
| H | -2.852201 | -2.340705 | -1.276128 |
| H | -4.666195 | -1.219256 | -1.105746 |
| H | -5.393279 | -0.224006 | 0.141213  |
| H | -4.736247 | -1.805882 | 0.568209  |

| 7-m  |            |            |            |
|------|------------|------------|------------|
| Atom | X axis (Å) | Y axis (Å) | Z axis (Å) |
| C    | 4.298218   | -0.431313  | -0.117349  |
| C    | 3.896282   | -1.748075  | -0.269617  |
| C    | 2.557042   | -2.111148  | -0.313145  |
| C    | 1.591524   | -1.124527  | -0.215138  |
| C    | 1.962708   | 0.231615   | -0.091058  |
| C    | 3.33453    | 0.562966   | -0.017845  |
| O    | 0.302369   | -1.51801   | -0.239368  |
| C    | -0.689628  | -0.58981   | 0.227504   |
| C    | -0.453933  | 0.771802   | -0.471516  |
| C    | 0.943182   | 1.259547   | -0.087053  |
| C    | -2.059009  | -1.159711  | -0.168478  |
| C    | -3.171676  | -0.16052   | 0.184849   |
| C    | -2.929643  | 1.195697   | -0.483431  |
| C    | -1.565119  | 1.803041   | -0.186966  |
| O    | 3.73184    | 1.833163   | 0.130778   |
| O    | 1.170814   | 2.44597    | 0.133894   |
| O    | -1.552133  | 2.281463   | 1.148075   |
| O    | -0.3498    | 0.609175   | -1.877351  |
| C    | -0.574741  | -0.498464  | 1.75649    |
| O    | -0.833821  | -1.779152  | 2.299281   |
| O    | -2.010226  | -1.441     | -1.568084  |
| C    | -4.549951  | -0.710846  | -0.170488  |
| H    | 5.34471    | -0.163625  | -0.065986  |
| H    | 4.650902   | -2.521568  | -0.342296  |
| H    | 2.254237   | -3.144965  | -0.404139  |
| H    | -2.21227   | -2.091418  | 0.378879   |
| H    | -3.145137  | -0.031672  | 1.269083   |
| H    | -3.03013   | 1.083431   | -1.565521  |
| H    | -3.694957  | 1.906712   | -0.168475  |
| H    | -1.385619  | 2.631395   | -0.877853  |
| H    | 2.934032   | 2.394444   | 0.199802   |
| H    | -0.750316  | 2.802212   | 1.256138   |
| H    | -0.944915  | -0.114097  | -2.13583   |
| H    | 0.434592   | -0.167755  | 2.020717   |
| H    | -1.271017  | 0.249427   | 2.131328   |
| H    | -0.810424  | -1.70498   | 3.25471    |

|       |            |            |            |
|-------|------------|------------|------------|
| H     | -2.857158  | -1.792167  | -1.850522  |
| H     | -5.328102  | -0.037558  | 0.19138    |
| H     | -4.712985  | -1.691052  | 0.282145   |
| H     | -4.686515  | -0.801163  | -1.251902  |
| <hr/> |            |            |            |
| <hr/> |            |            |            |
| 7-n   |            |            |            |
| Atom  | X axis (Å) | Y axis (Å) | Z axis (Å) |
| C     | 4.289771   | -0.397347  | -0.09389   |
| C     | 3.892923   | -1.711735  | -0.261635  |
| C     | 2.553135   | -2.072234  | -0.343421  |
| C     | 1.590939   | -1.085194  | -0.257699  |
| C     | 1.953116   | 0.270121   | -0.104042  |
| C     | 3.325524   | 0.600086   | -0.01402   |
| O     | 0.293707   | -1.471713  | -0.357376  |
| C     | -0.704154  | -0.590194  | 0.200309   |
| C     | -0.483344  | 0.813447   | -0.403579  |
| C     | 0.933774   | 1.306366   | -0.086991  |
| C     | -2.084667  | -1.151145  | -0.208975  |
| C     | -3.195845  | -0.163034  | 0.194904   |
| C     | -2.951742  | 1.22842    | -0.394205  |
| C     | -1.58688   | 1.800763   | -0.017068  |
| O     | 3.722614   | 1.866418   | 0.141296   |
| O     | 1.187562   | 2.495292   | 0.048449   |
| O     | -1.478688  | 2.049721   | 1.374622   |
| O     | -0.542484  | 0.751182   | -1.832651  |
| C     | -0.534309  | -0.649296  | 1.734087   |
| O     | -0.629851  | -1.973076  | 2.213111   |
| O     | -2.149296  | -1.512086  | -1.574515  |
| C     | -4.569978  | -0.69804   | -0.189761  |
| H     | 5.334875   | -0.129304  | -0.021078  |
| H     | 4.648231   | -2.485277  | -0.322571  |
| H     | 2.250231   | -3.103316  | -0.46165   |
| H     | -2.229916  | -2.082083  | 0.339234   |
| H     | -3.168973  | -0.075215  | 1.283474   |
| H     | -3.037786  | 1.2007     | -1.483626  |
| H     | -3.723767  | 1.917925   | -0.044273  |
| H     | -1.396624  | 2.719888   | -0.577068  |
| H     | 2.922778   | 2.432093   | 0.163578   |
| H     | -2.035512  | 2.80036    | 1.589442   |
| H     | 0.150031   | 0.167012   | -2.159666  |
| H     | 0.424794   | -0.204643  | 2.016875   |
| H     | -1.309179  | -0.07084   | 2.223035   |
| H     | 0.042897   | -2.503388  | 1.777451   |
| H     | -1.909797  | -0.7385    | -2.09538   |

| H     | -4.664078  | -0.795084  | -1.272322  |
|-------|------------|------------|------------|
| H     | -5.351527  | -0.022096  | 0.162161   |
| H     | -4.744772  | -1.680053  | 0.25481    |
| <hr/> |            |            |            |
| <hr/> |            |            |            |
| 7-o   |            |            |            |
| <hr/> |            |            |            |
| Atom  | X axis (Å) | Y axis (Å) | Z axis (Å) |
| C     | 4.262201   | -0.518108  | -0.111862  |
| C     | 3.873294   | -1.828675  | 0.105814   |
| C     | 2.536608   | -2.193228  | 0.202776   |
| C     | 1.564166   | -1.217622  | 0.068671   |
| C     | 1.92171    | 0.121073   | -0.178546  |
| C     | 3.28761    | 0.462944   | -0.248421  |
| O     | 0.276301   | -1.615737  | 0.171605   |
| C     | -0.724619  | -0.617779  | 0.435863   |
| C     | -0.519539  | 0.546269   | -0.560124  |
| C     | 0.8877     | 1.11851    | -0.382739  |
| C     | -2.09018   | -1.286488  | 0.196815   |
| C     | -3.234819  | -0.256681  | 0.264228   |
| C     | -2.987588  | 0.928238   | -0.671728  |
| C     | -1.635926  | 1.598385   | -0.468671  |
| O     | 3.673626   | 1.729658   | -0.458154  |
| O     | 1.113544   | 2.313846   | -0.530921  |
| O     | -1.614347  | 2.295946   | 0.779769   |
| O     | -0.475914  | 0.071786   | -1.89912   |
| C     | -0.639442  | -0.238401  | 1.938181   |
| O     | 0.220164   | 0.830474   | 2.252399   |
| O     | -2.027311  | -1.936752  | -1.069865  |
| C     | -4.586161  | -0.90864   | -0.016264  |
| H     | 5.305966   | -0.241726  | -0.174091  |
| H     | 4.634046   | -2.591937  | 0.21463    |
| H     | 2.242844   | -3.216026  | 0.393754   |
| H     | -2.23917   | -2.040846  | 0.97823    |
| H     | -3.269754  | 0.117804   | 1.288499   |
| H     | -3.050303  | 0.591382   | -1.709041  |
| H     | -3.769783  | 1.676208   | -0.533974  |
| H     | -1.460895  | 2.308371   | -1.277655  |
| H     | 2.867566   | 2.281594   | -0.518509  |
| H     | -1.20369   | 3.150256   | 0.629949   |
| H     | -1.017213  | -0.73268   | -1.954472  |
| H     | -1.638619  | -0.03887   | 2.32582    |
| H     | -0.260459  | -1.12493   | 2.446856   |
| H     | -0.266157  | 1.628683   | 2.005054   |
| H     | -2.875277  | -2.343531  | -1.260821  |
| H     | -4.684626  | -1.206008  | -1.064088  |

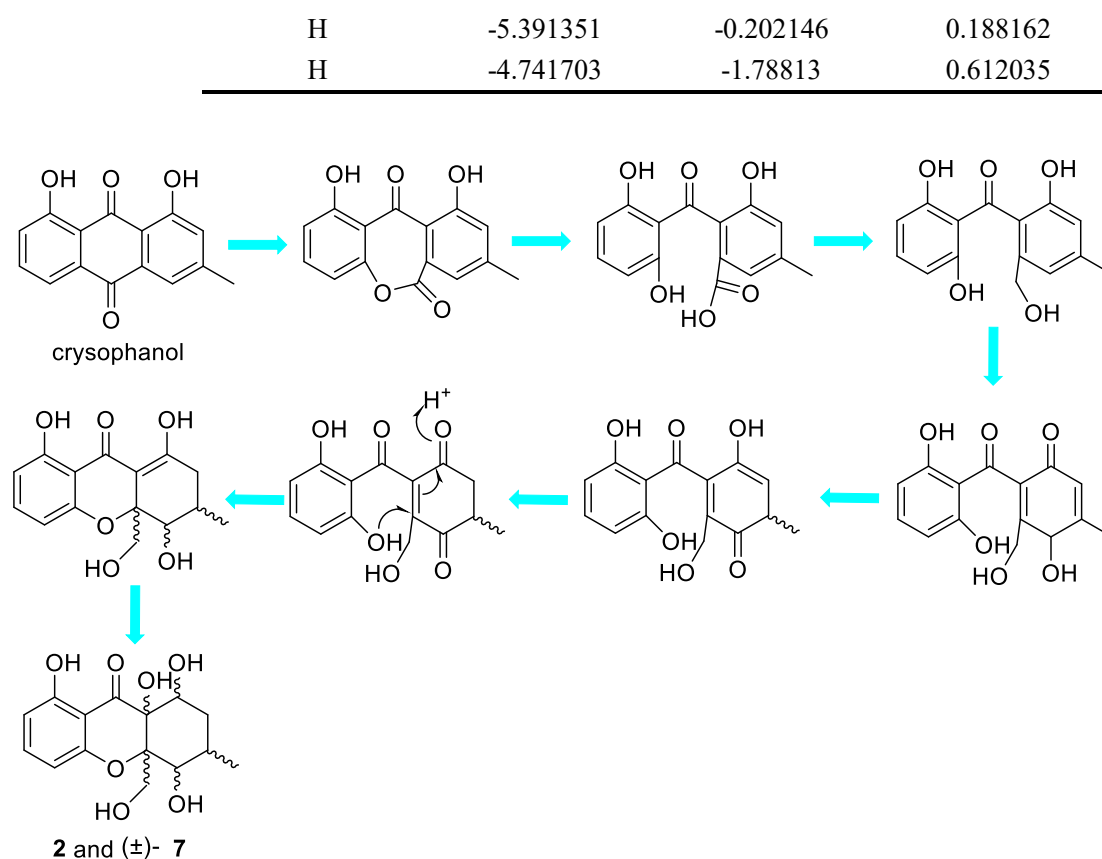

**Figure S62.** Plausible biogenetic pathway leading to a formation of 2 and (±)-7.

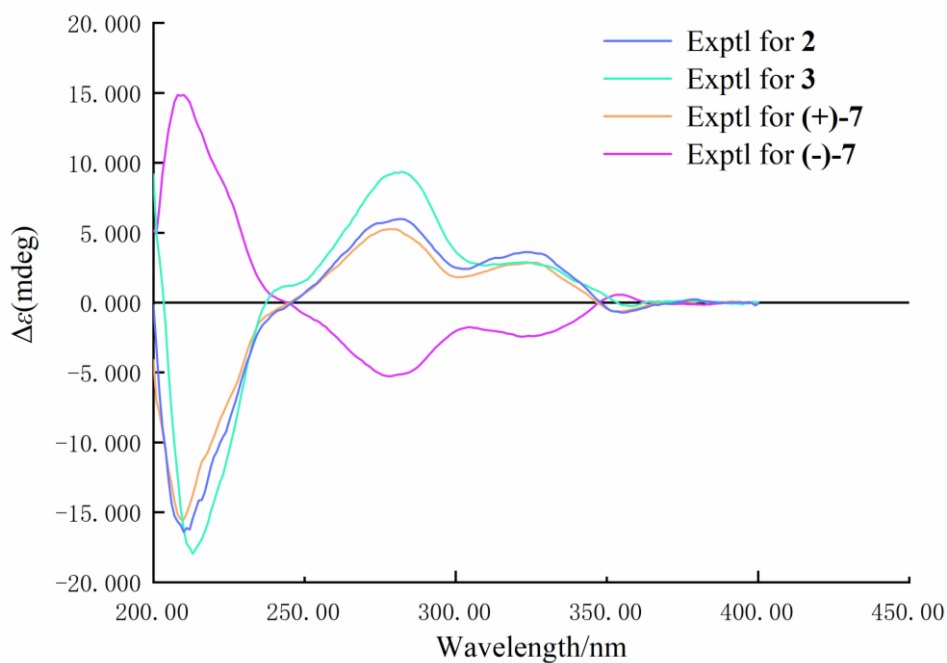

**Figure S63.** Experimental ECD spectra of 2, 3, (+) and (-)-7 (in MeOH).
